# Supplementary material for: An access to highly enantioenriched cis-3,5-disubstituted γ-lactones from α-bromoacetate and silyl enol ether
Source: Royal Society of Chemistry journal article supplement (doi:10.1039/d1ob01403j), 2021-01-01

## Supplemental Information

An Access to Highly Enantioenriched *cis*-3,5-Disubstituted  $\gamma$ -Lactones  
from  $\alpha$ -Bromoacetate and Silyl Enol Ether

### Contents

I. NMR Spectra for **2a-b**, **3**, **4a-k**, **5**, **6**, **7**, **8** and **9**

II. Chiral stationary phase HPLC chromatograms of **3**, **4a-k**, **5**, **6**, **7**, **8** and **9**

# N-Benzoyl-O-(2,4-diphenyl-4-oxobutanoyl)-L-threonine Isopropyl Ester (2a)

7.950  
7.932  
7.929  
7.842  
7.825  
7.821  
7.583  
7.565  
7.549  
7.546  
7.543  
7.539  
7.536  
7.533  
7.522  
7.517  
7.513  
7.502  
7.499  
7.496  
7.464  
7.444  
7.440  
7.423  
7.420  
7.406  
7.402  
7.393  
7.382  
7.343  
7.332  
7.310  
7.301  
7.291  
7.287  
7.280  
7.072  
7.051  
5.494  
5.486  
5.478  
5.470  
5.127  
5.111  
5.095  
4.862  
4.854  
4.839  
4.832  
4.286  
4.276  
4.259  
4.249  
3.945  
3.918  
3.899  
3.873  
3.315  
3.305  
3.270  
3.260  
1.251  
1.235  
1.218  
1.197  
1.182

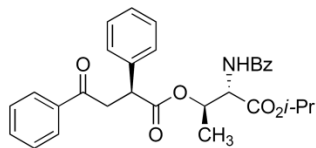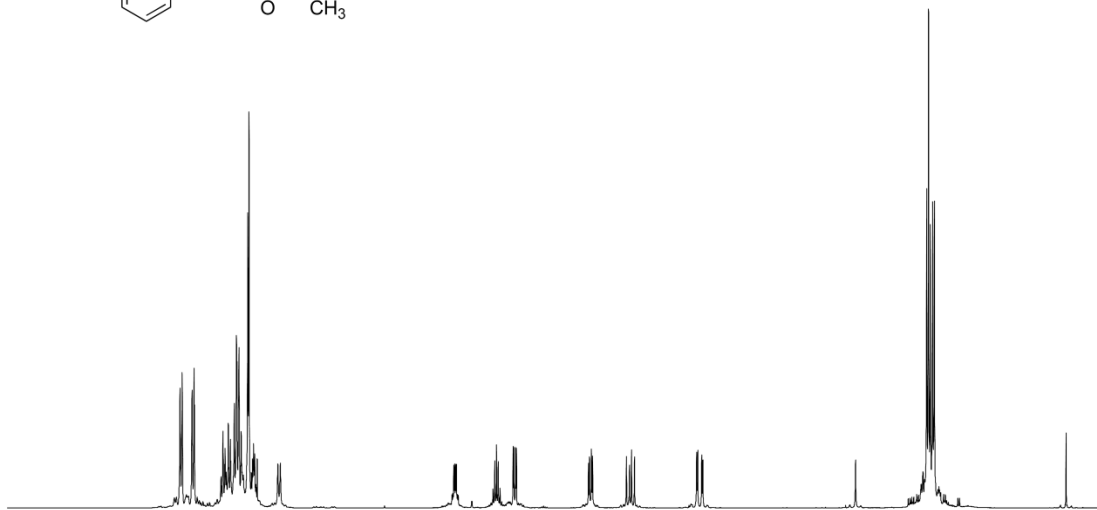

9.0 8.5 8.0 7.5 7.0 6.5 6.0 5.5 5.0 4.5 4.0 3.5 3.0 2.5 2.0 1.5 1.0 0.5 ppm

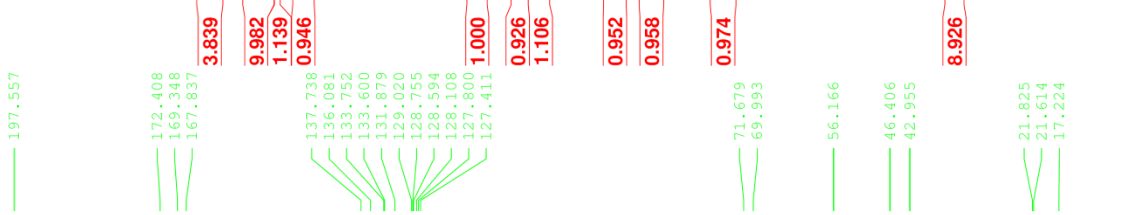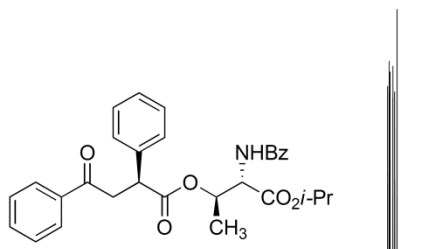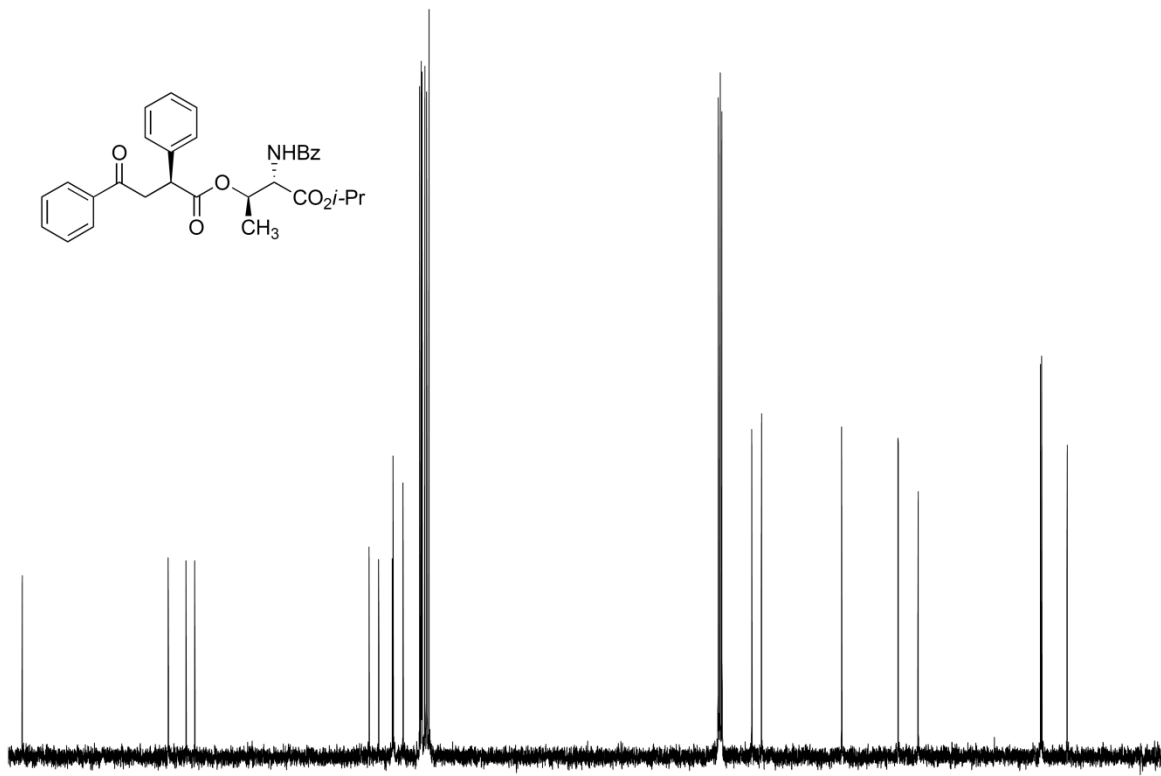

180 160 140 120 100 80 60 40 20 ppm

*N*-Benzoyl-*O*-(4-Methyl-4-oxo-2-phenylbutanoyl)-*L*-threonine Isopropyl Ester (**2b**)

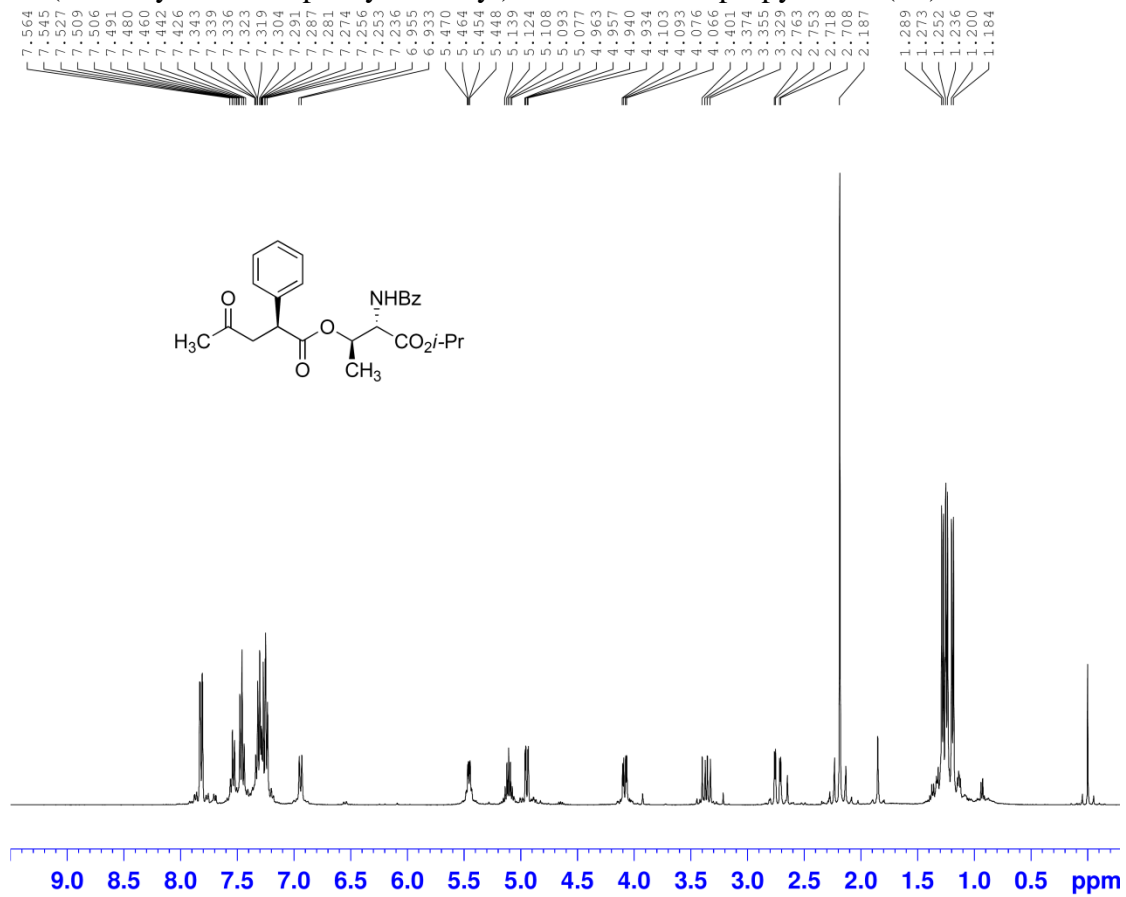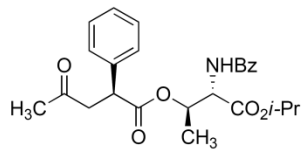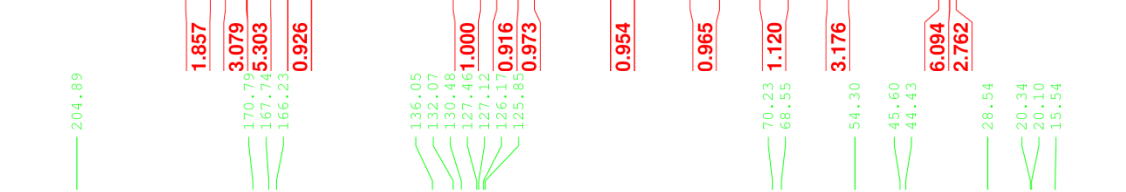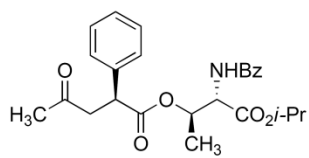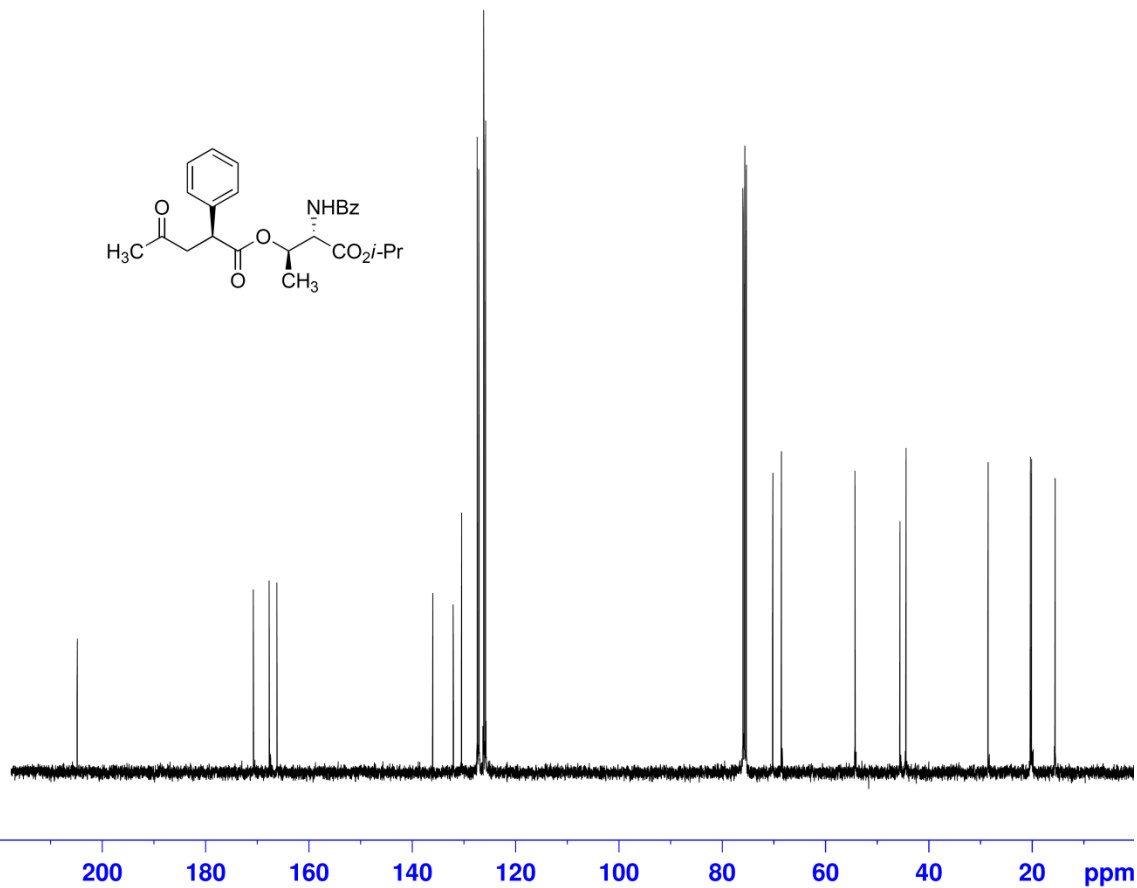

# Ethyl 4-oxo-2,4-diphenylbutanoate (3)

7.994, 7.976, 7.973, 7.594, 7.591, 7.575, 7.557, 7.554, 7.482, 7.479, 7.462, 7.444, 7.416, 7.407, 7.369, 7.357, 7.320, 7.316, 7.313, 7.309, 7.299, 7.267, 7.263, 4.292, 4.289, 4.282, 4.266, 4.263, 4.256, 4.253, 4.234, 4.231, 4.216, 4.213, 4.207, 4.204, 4.189, 4.186, 4.131, 4.128, 4.113, 4.110, 4.104, 4.100, 4.086, 4.083, 3.997, 3.994, 3.971, 3.967, 3.952, 3.949, 3.926, 3.922, 3.299, 3.296, 3.289, 3.286, 3.254, 3.250, 3.244, 1.240, 1.236, 1.222, 1.218, 1.204

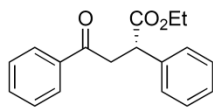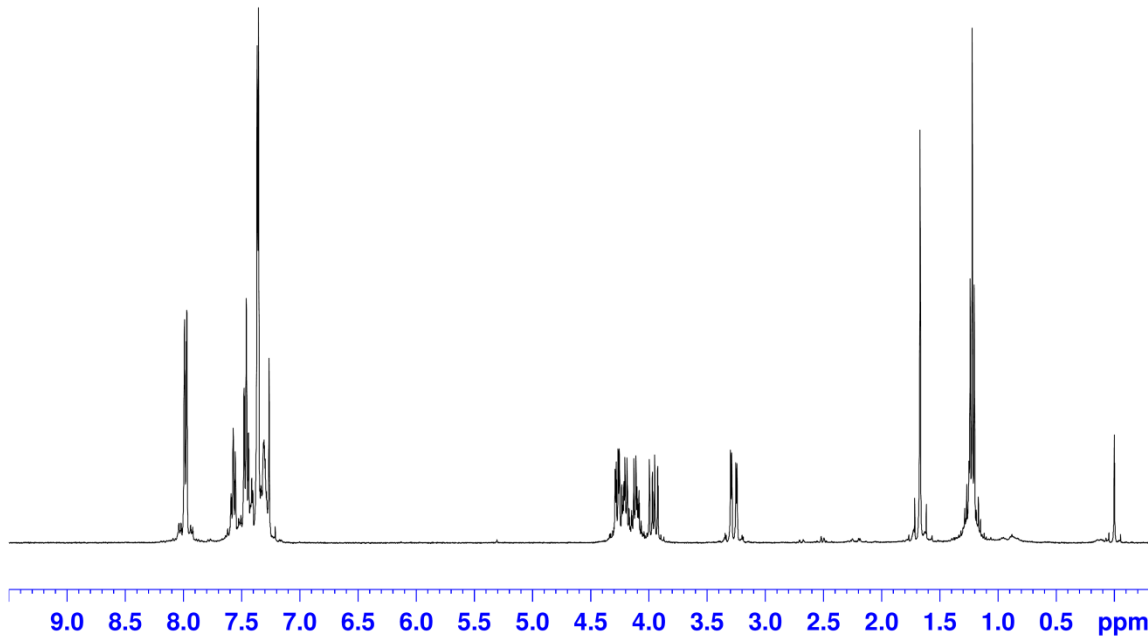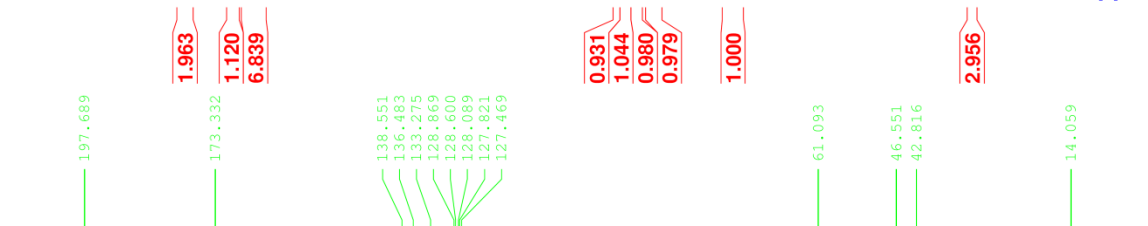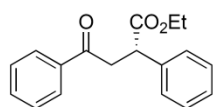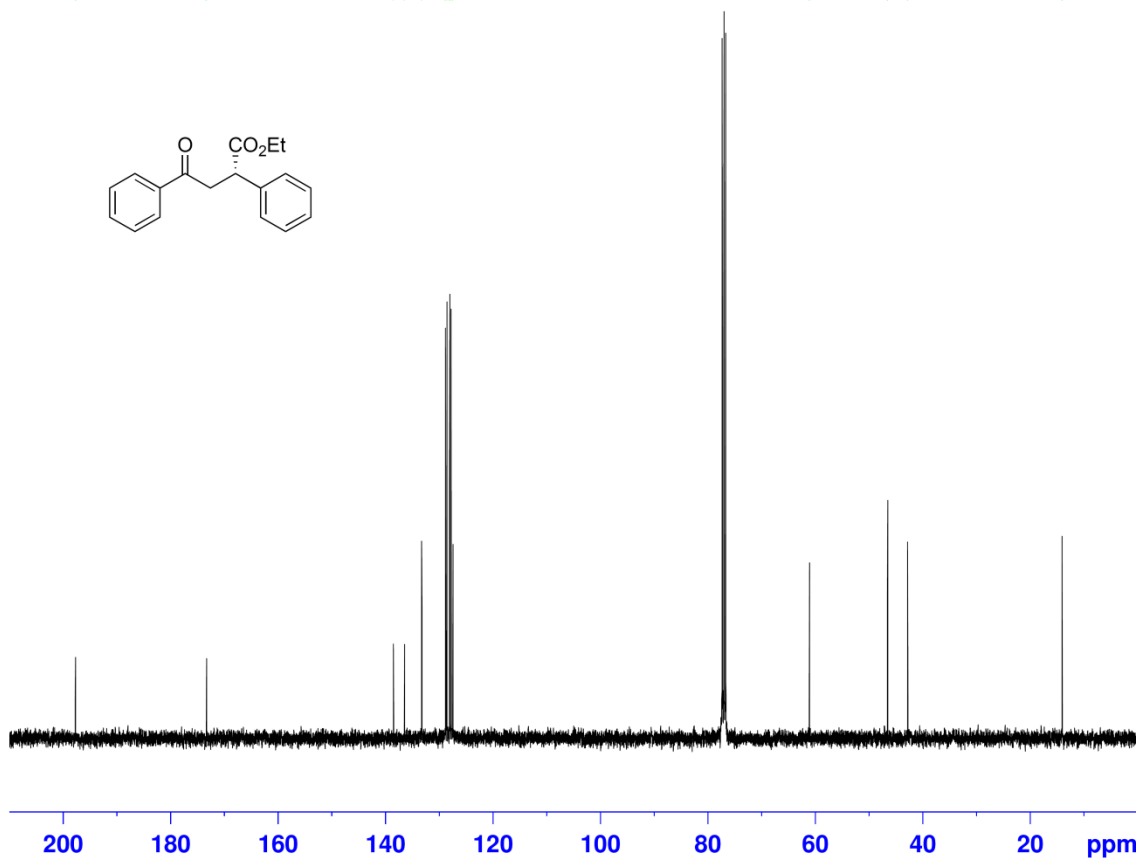

*cis*-3,5-Diphenyldihydrofuran-2(3*H*)-one (*cis*-4a)

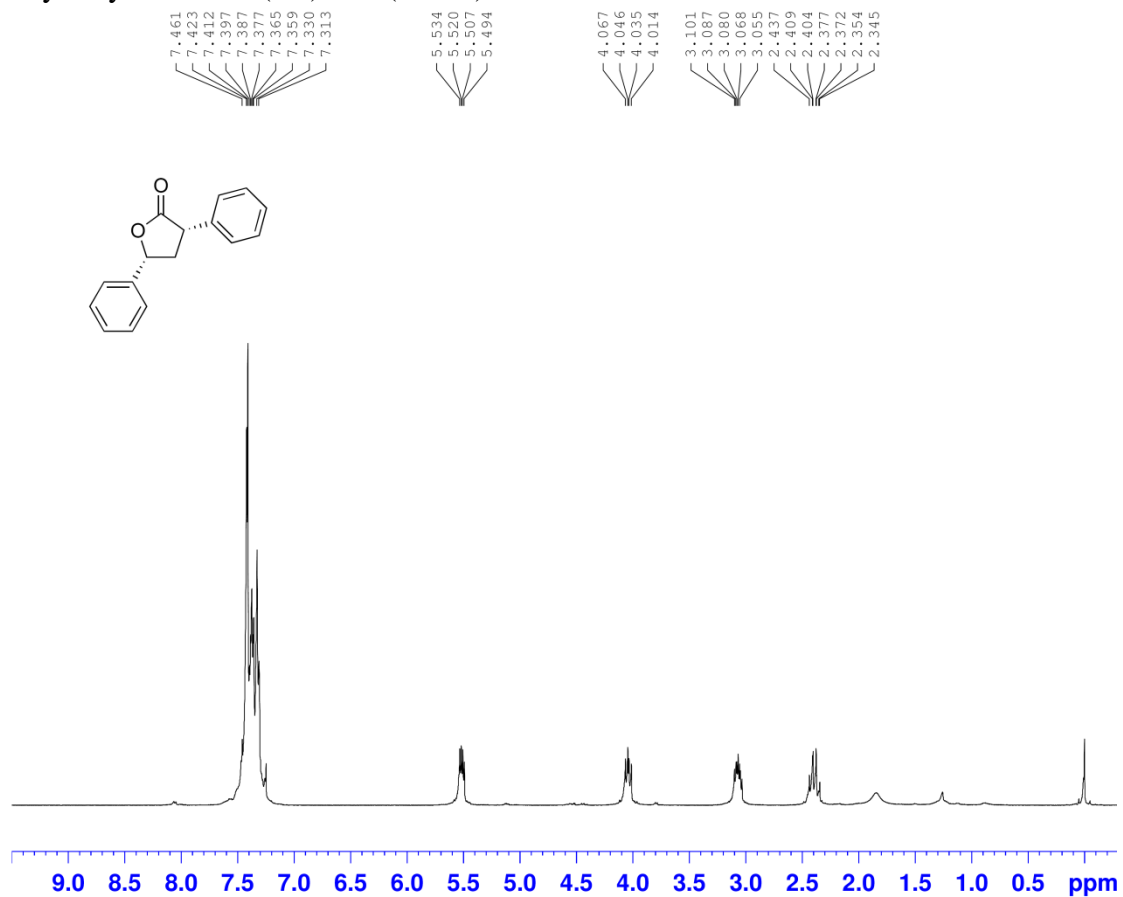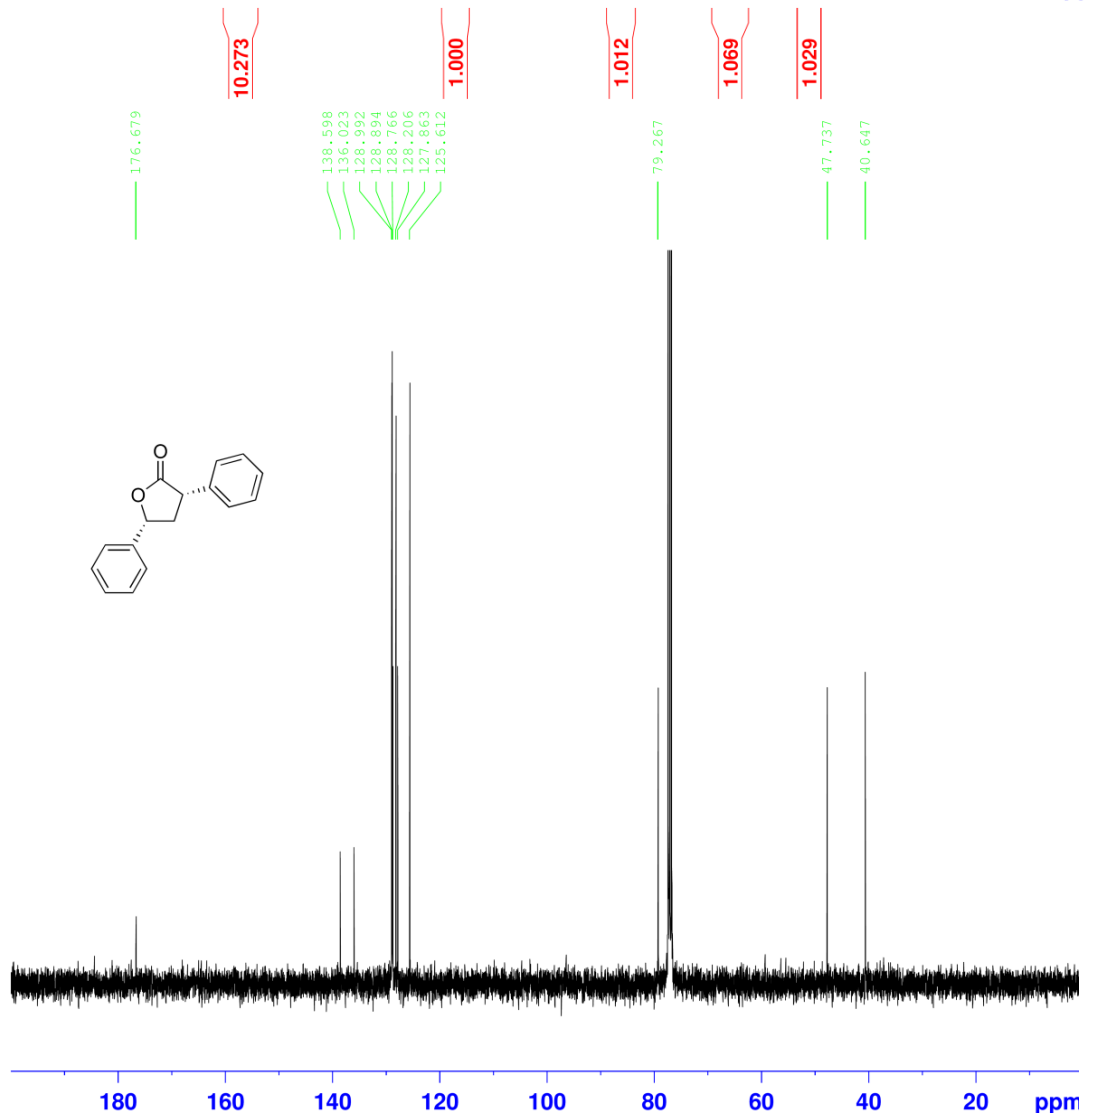

*trans*-3,5-Diphenyldihydrofuran-2(3*H*)-one (*trans*-4a)

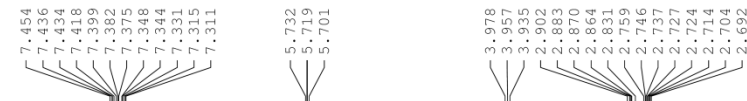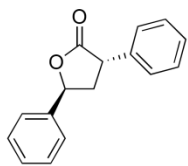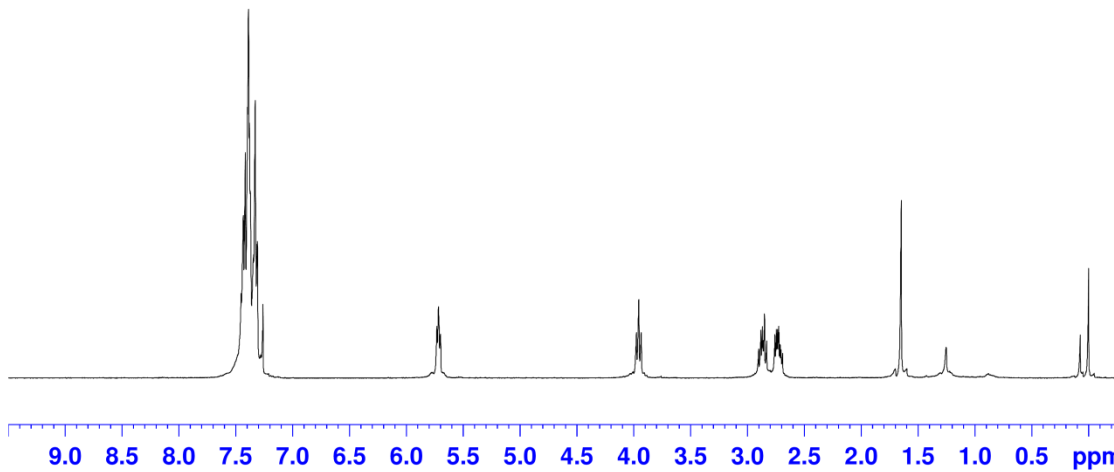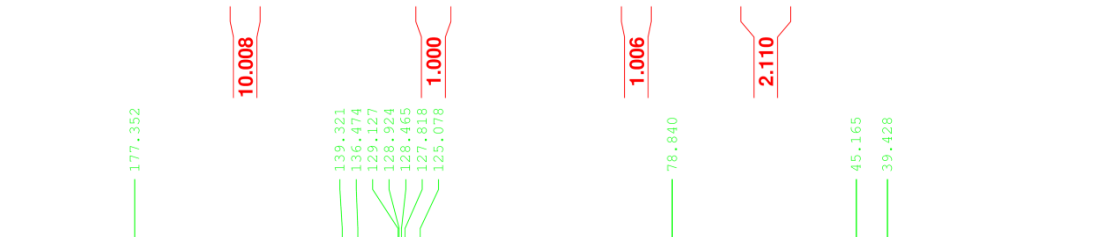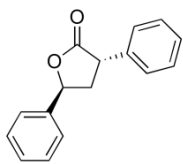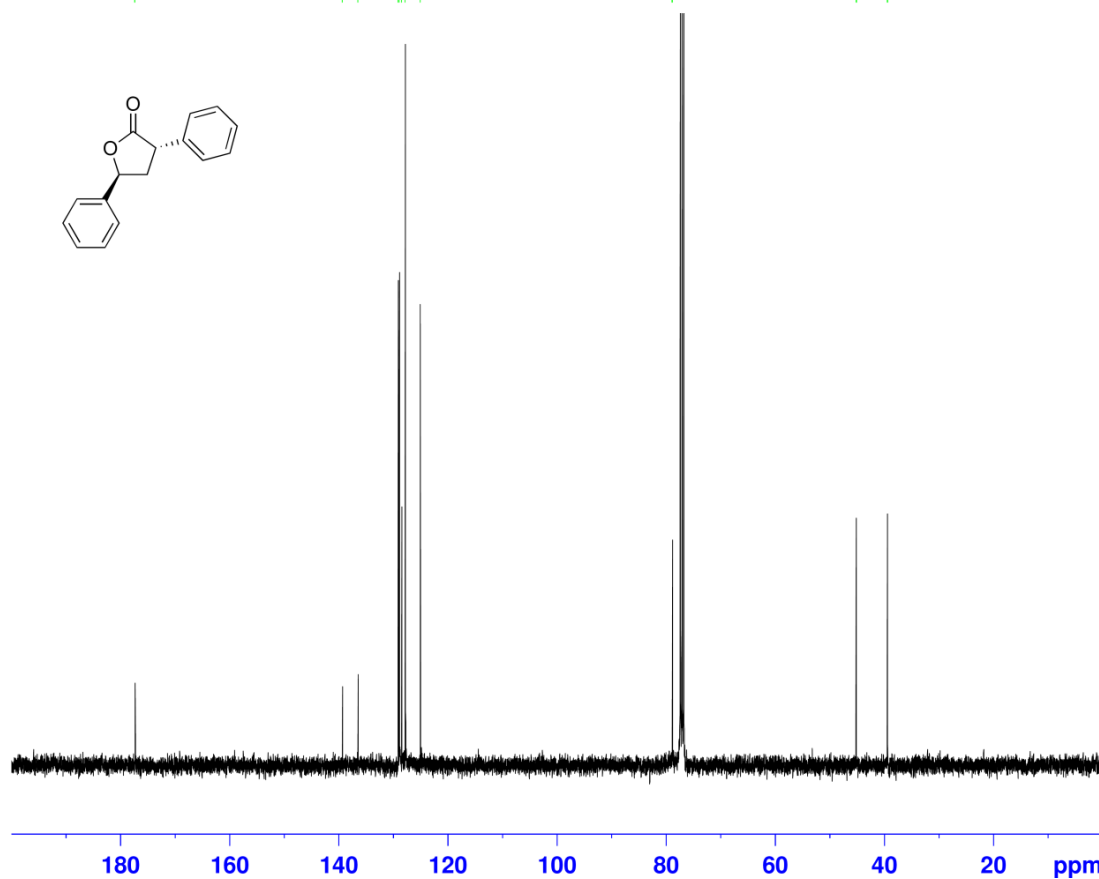

*cis*-5-(4-Methoxyphenyl)-3-phenyldihydrofuran-2(3*H*)-one (*cis*-**4b**)

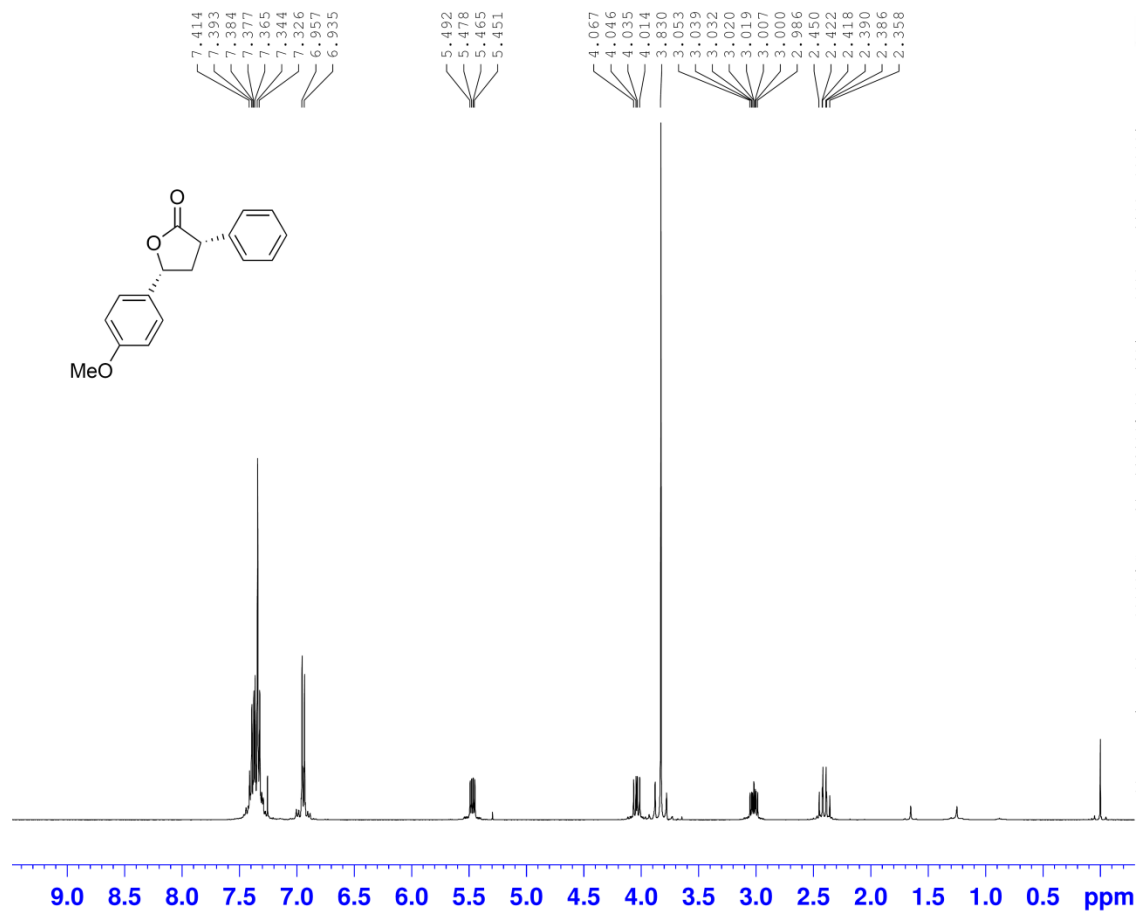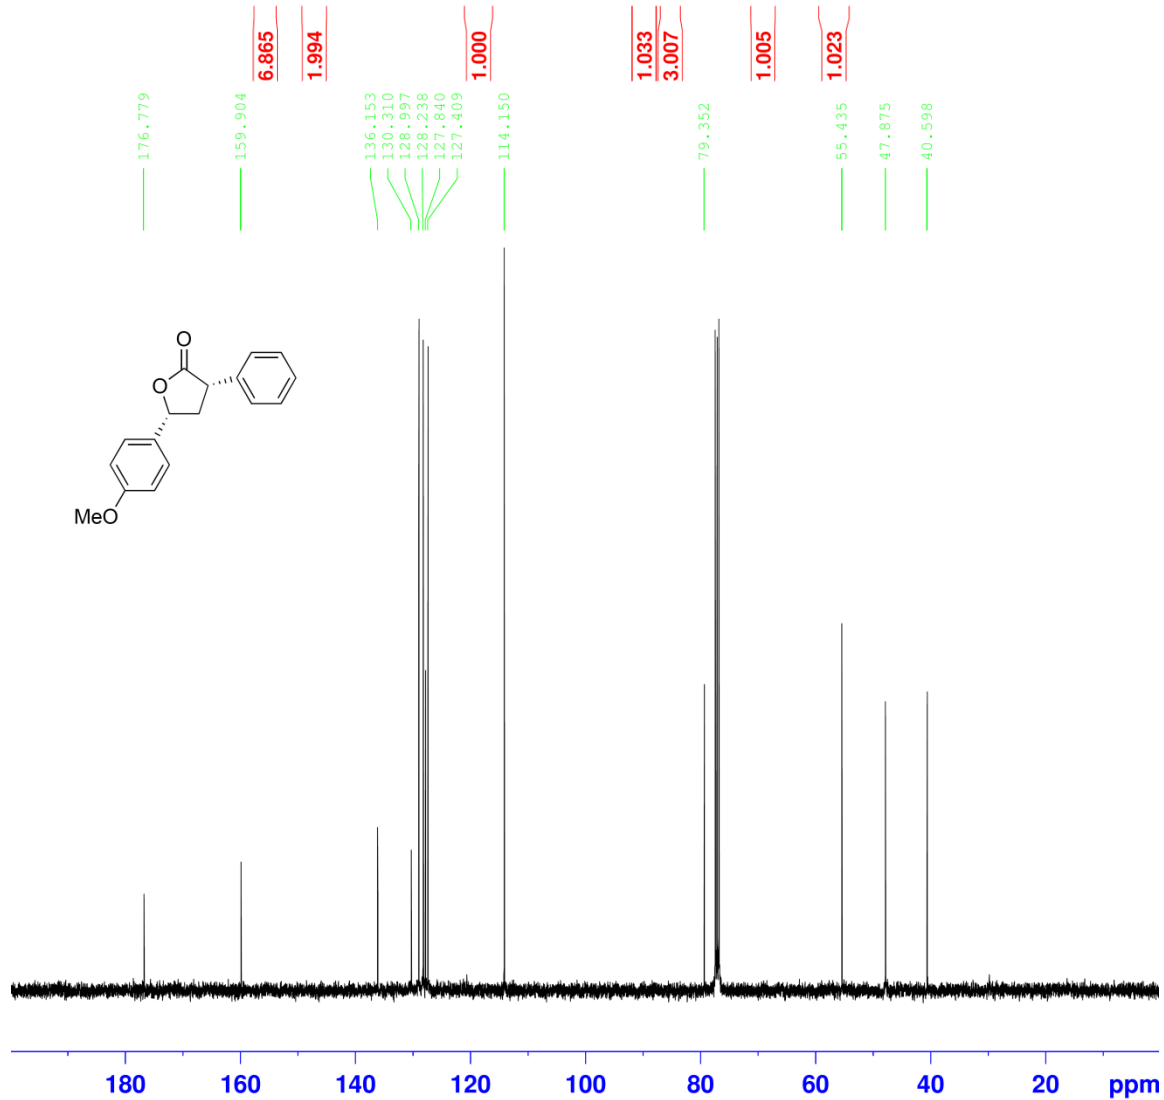

*cis*-5-(4-Methoxyphenyl)-3-phenyldihydrofuran-2(3*H*)-one (*cis*-**4c**)

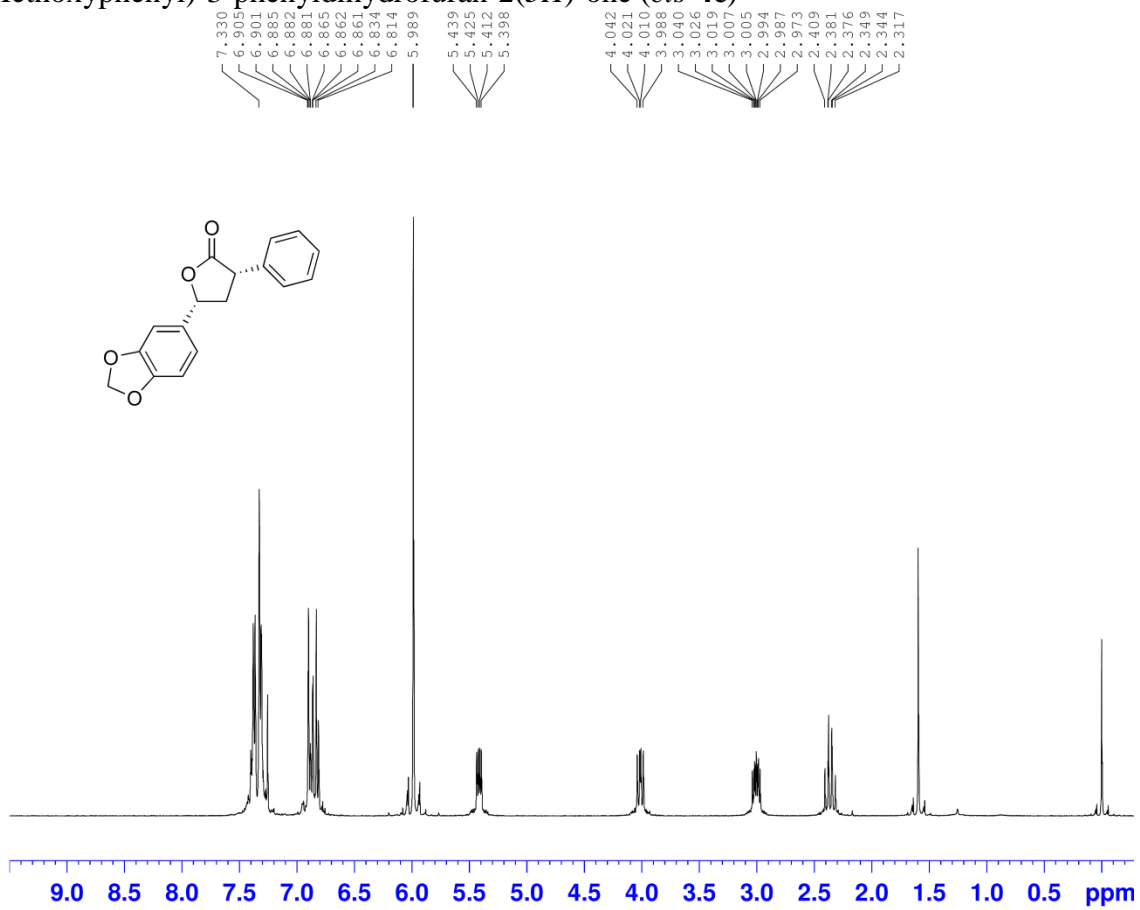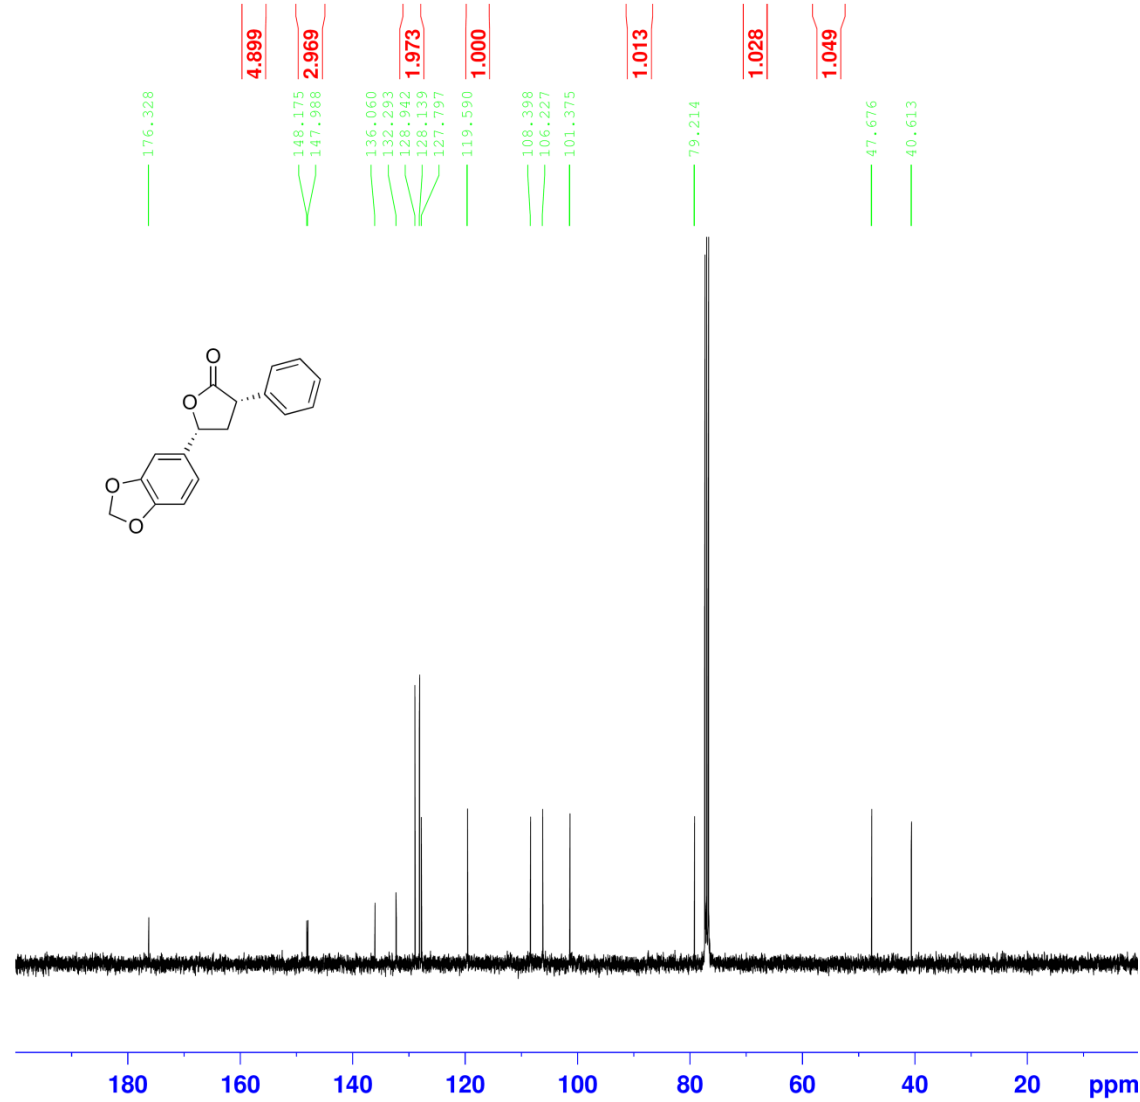



*cis*-5-(2-Naphthyl)-3-phenyldihydrofuran-2(3*H*)-one (*cis*-4d)

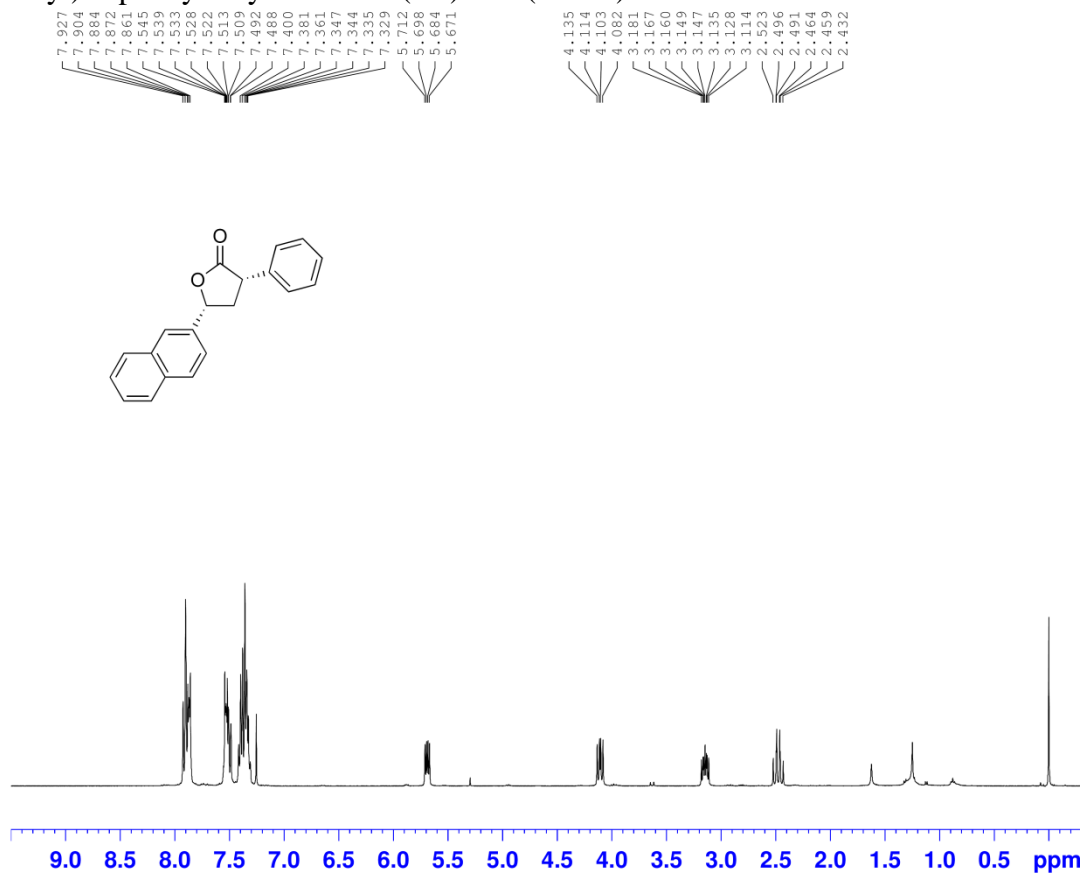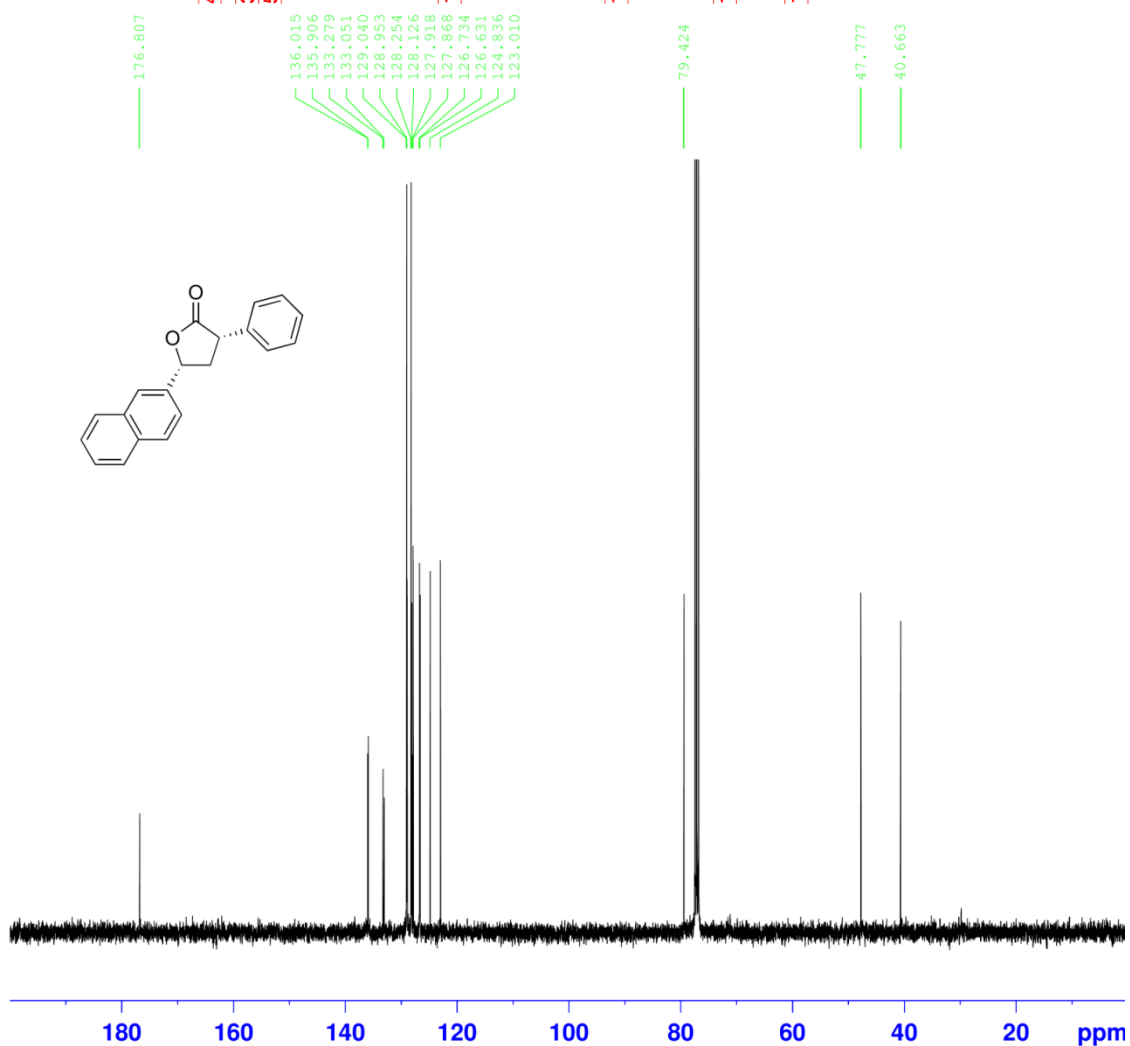

*cis*-5-(4-Methylphenyl)-3-phenyldihydrofuran-2(3*H*)-one (*cis*-**4e**)

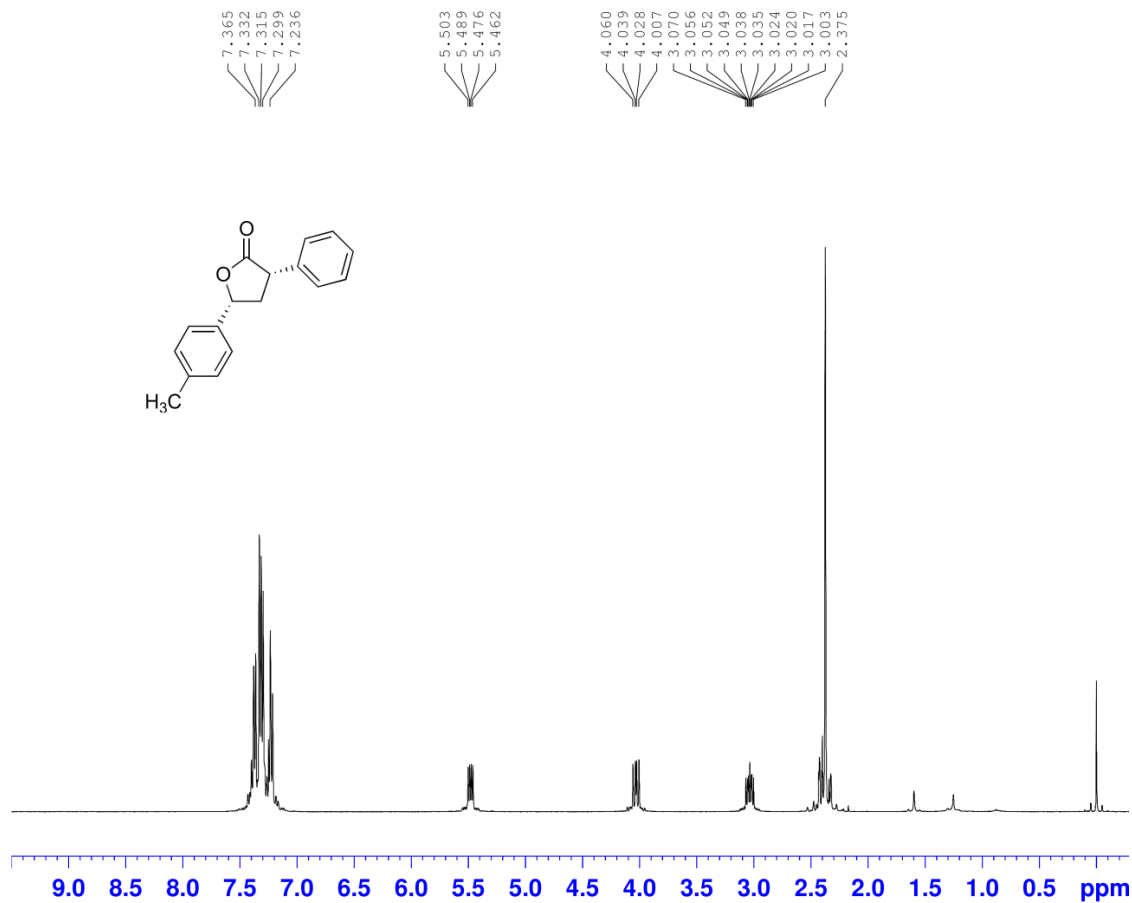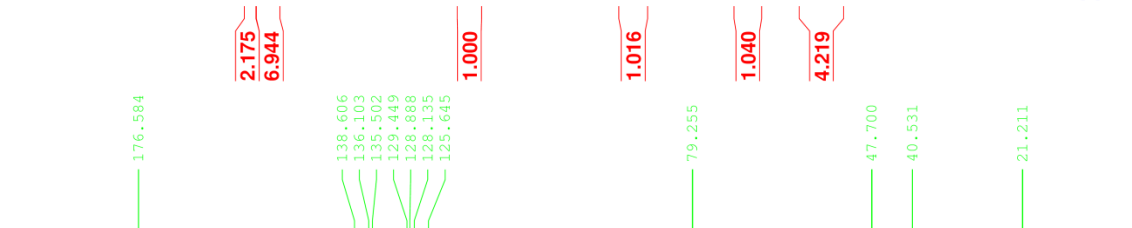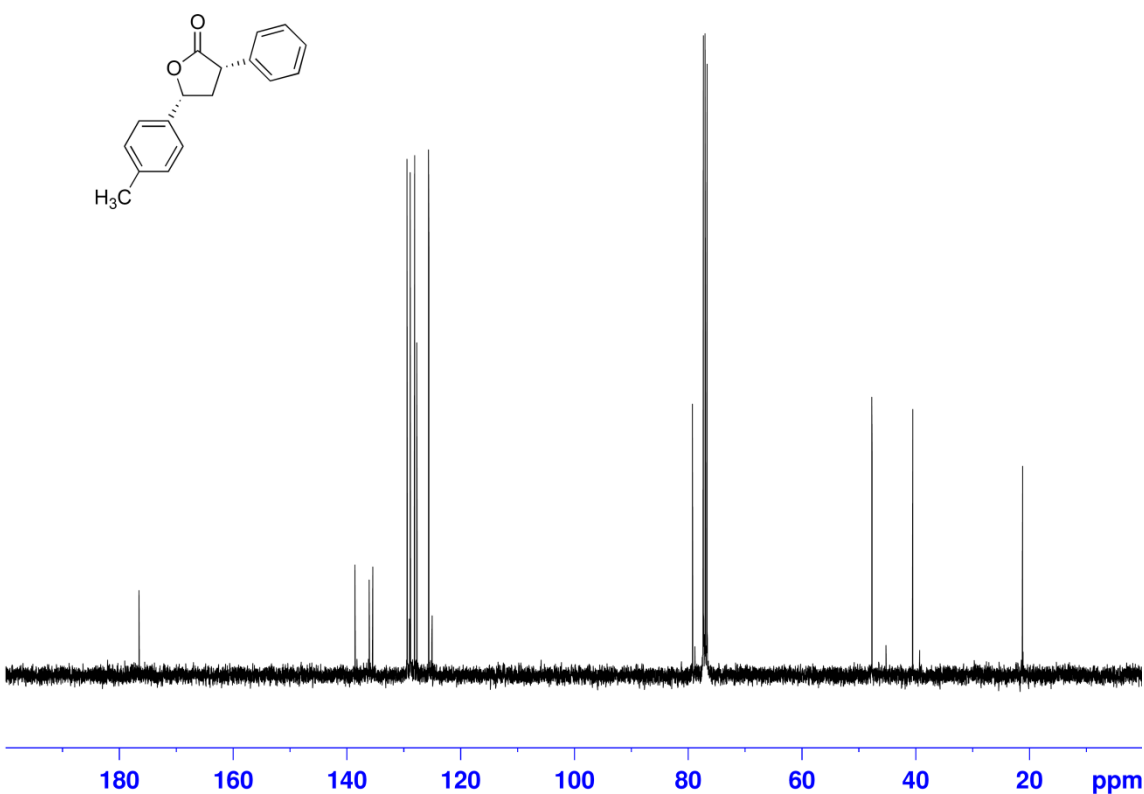

*cis*-5-(4-Bromophenyl)-3-phenyldihydrofuran-2(3*H*)-one (*cis*-4f)

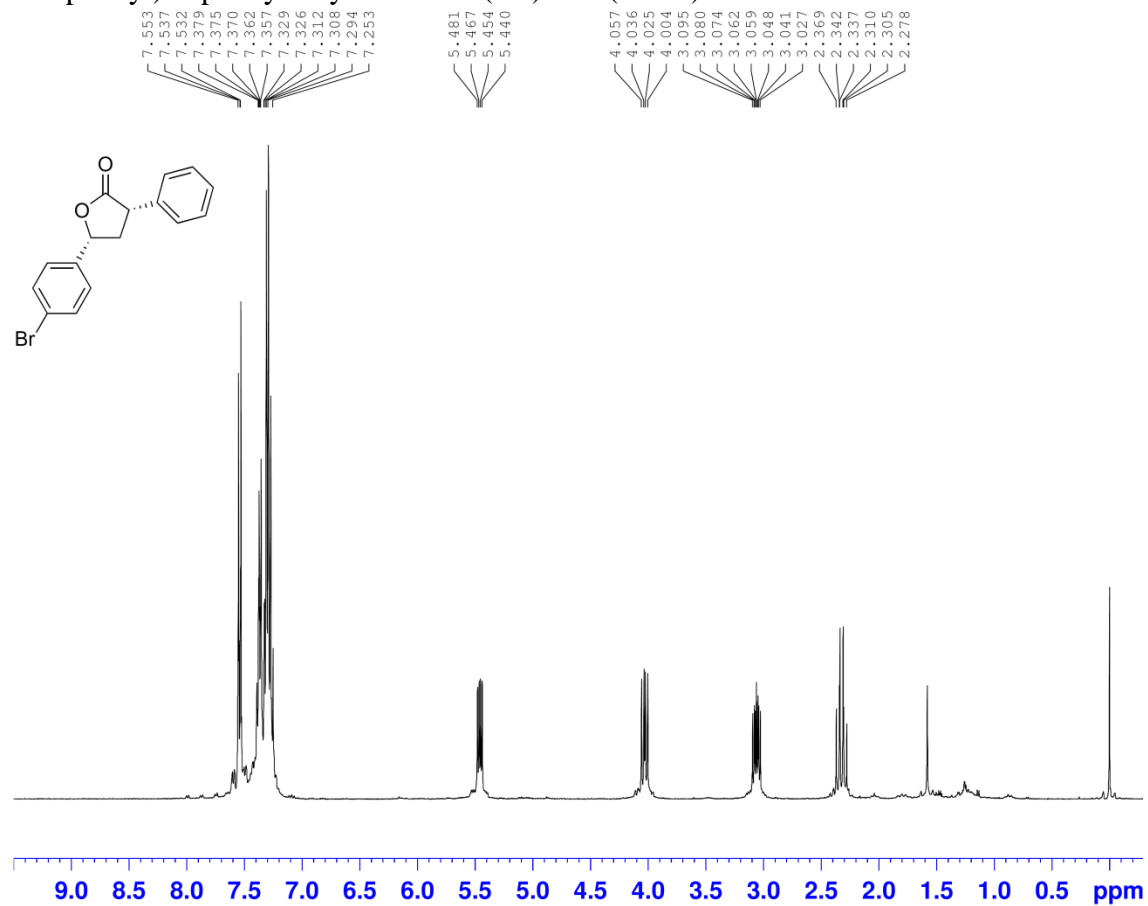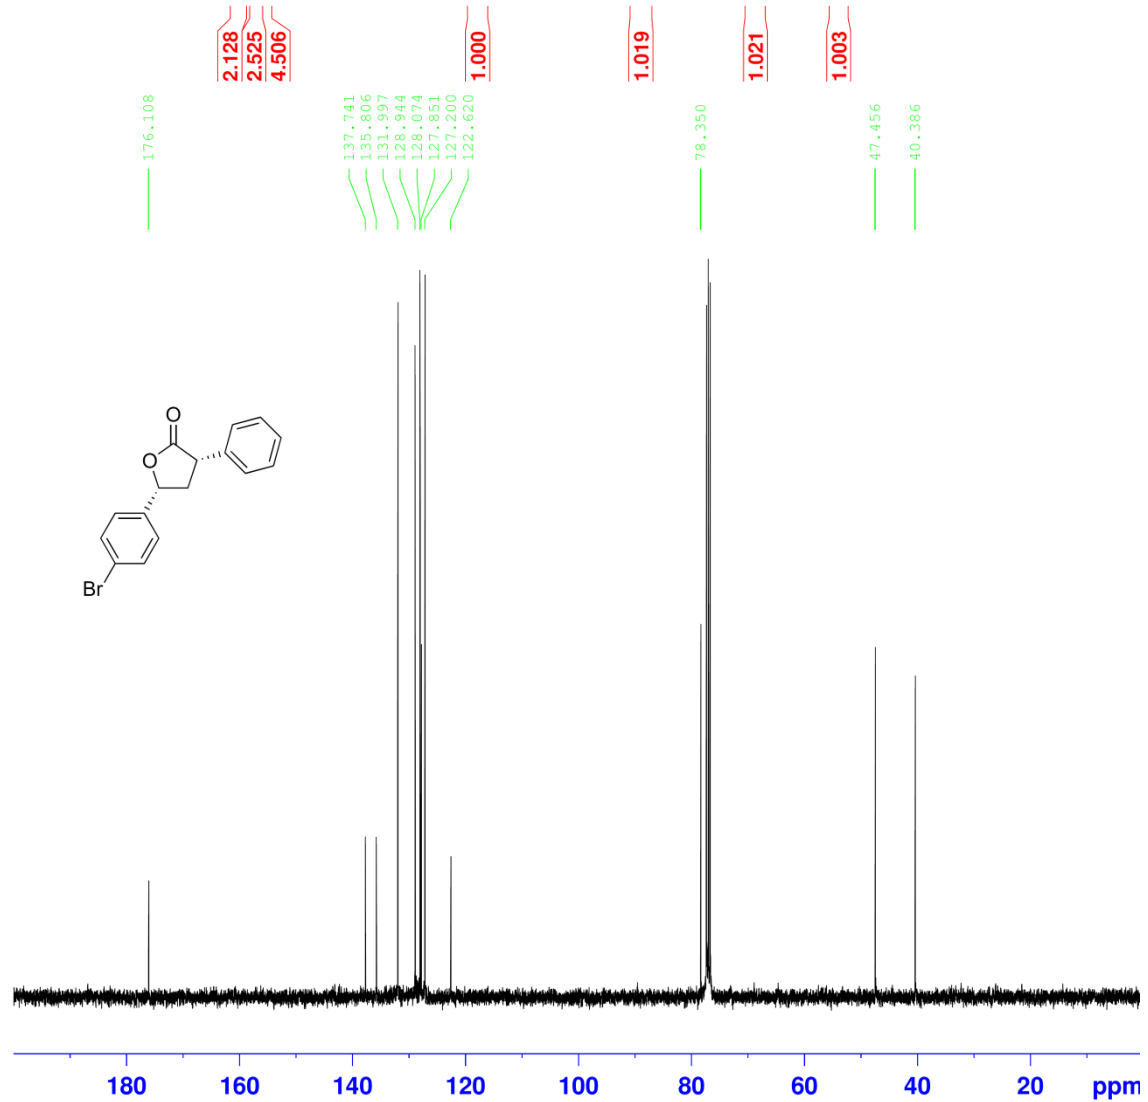

*cis*-5-(4-Chlorophenyl)-3-phenyldihydrofuran-2(3*H*)-one (*cis*-4g)

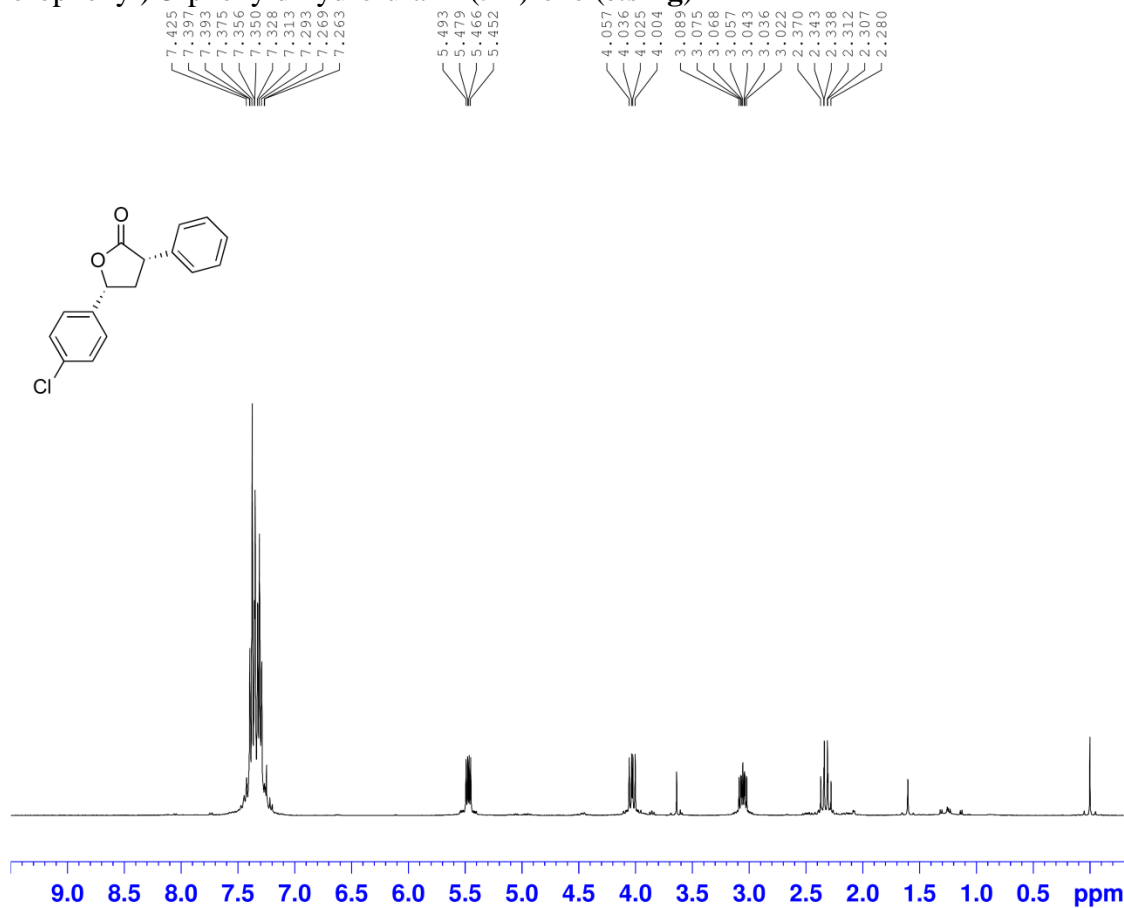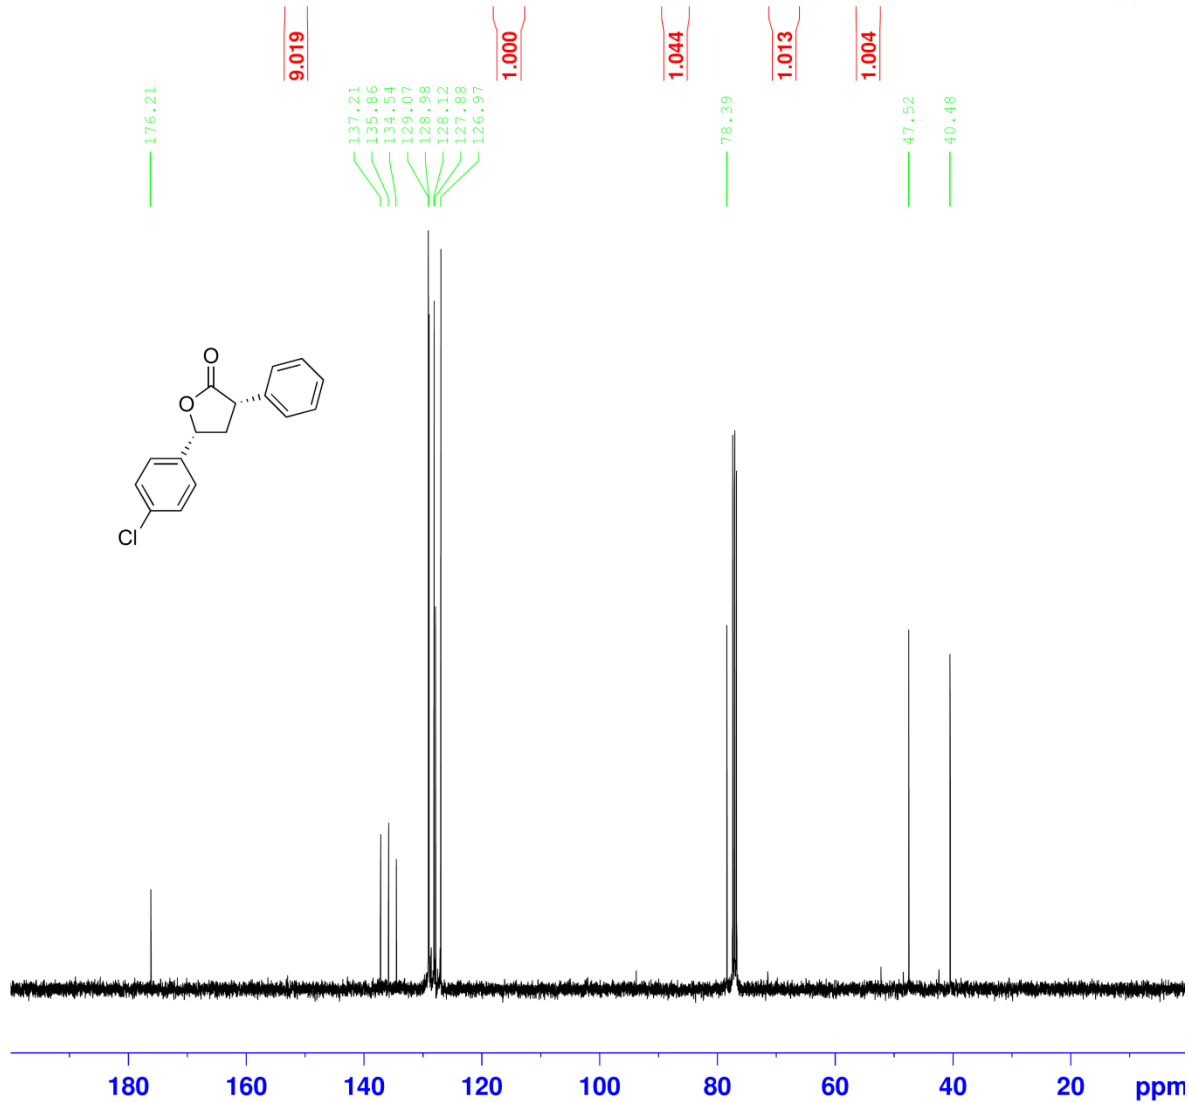

*cis*-5-(3-Bromophenyl)-3-phenyldihydrofuran-2(3*H*)-one (*cis*-**4h**)

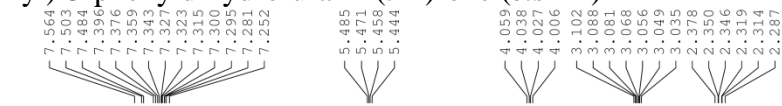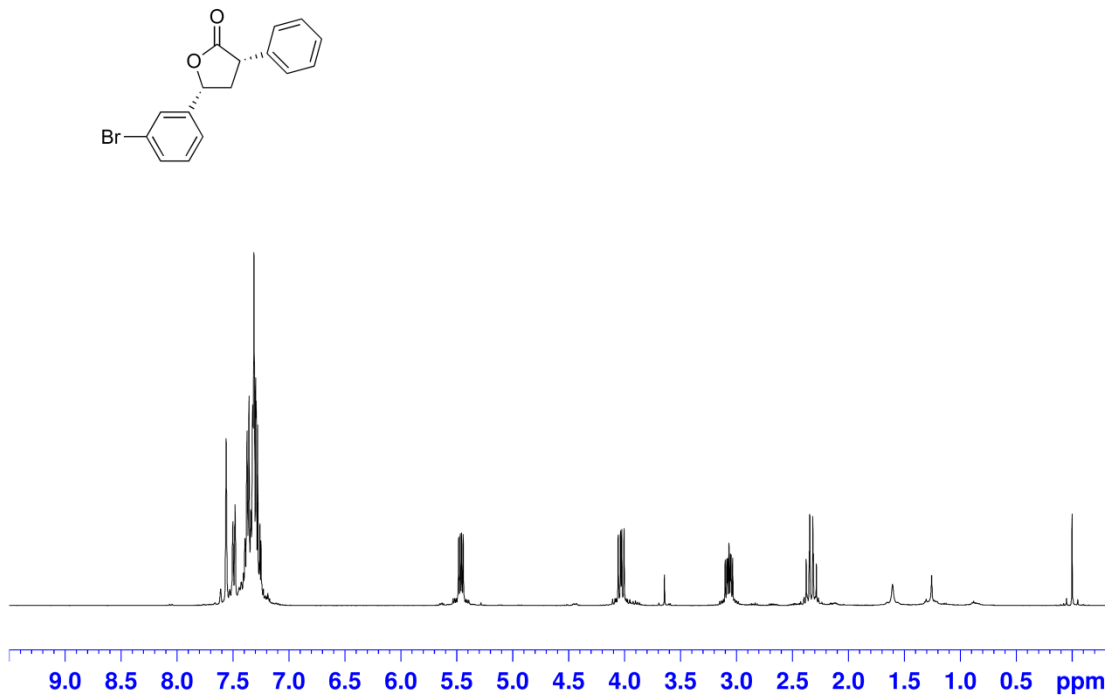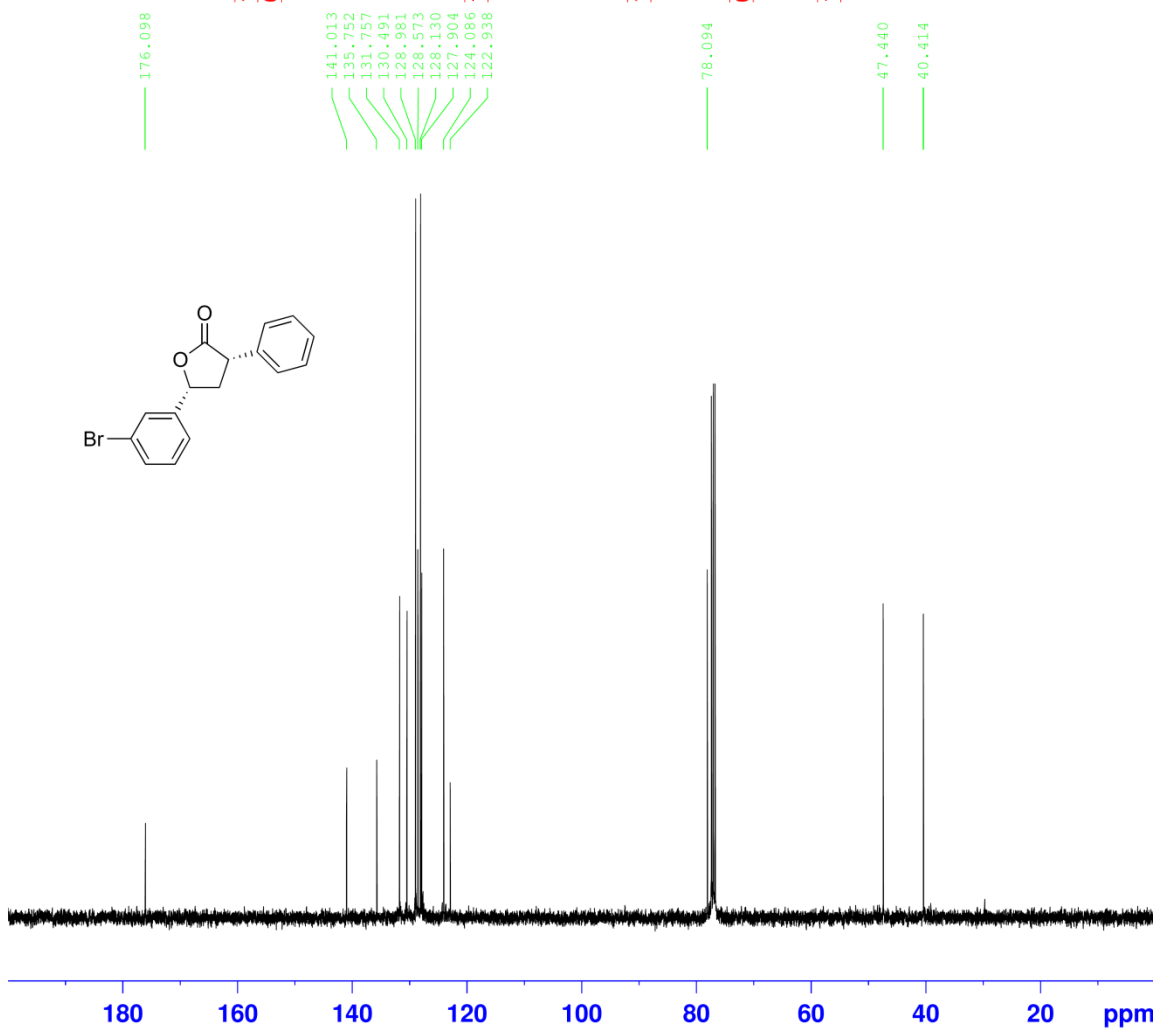

*cis*-5-Methyl-3-phenyldihydrofuran-2(3*H*)-one (*cis*-**4i**)

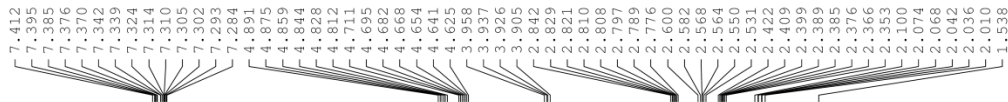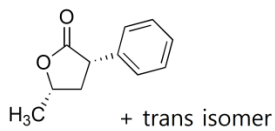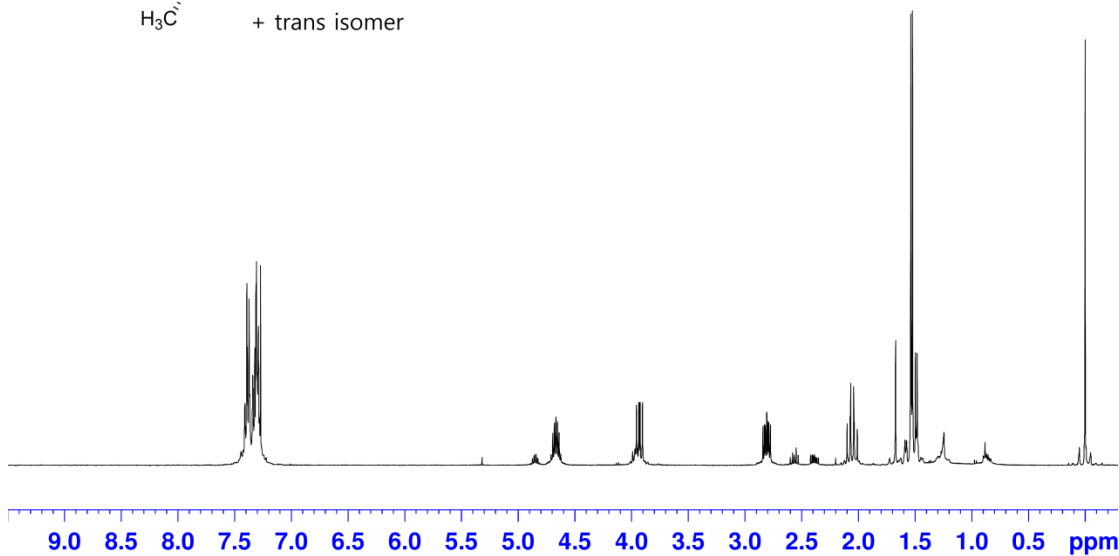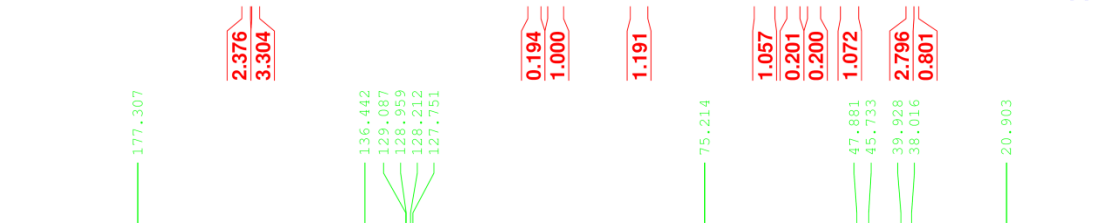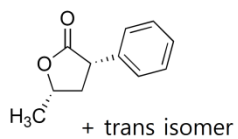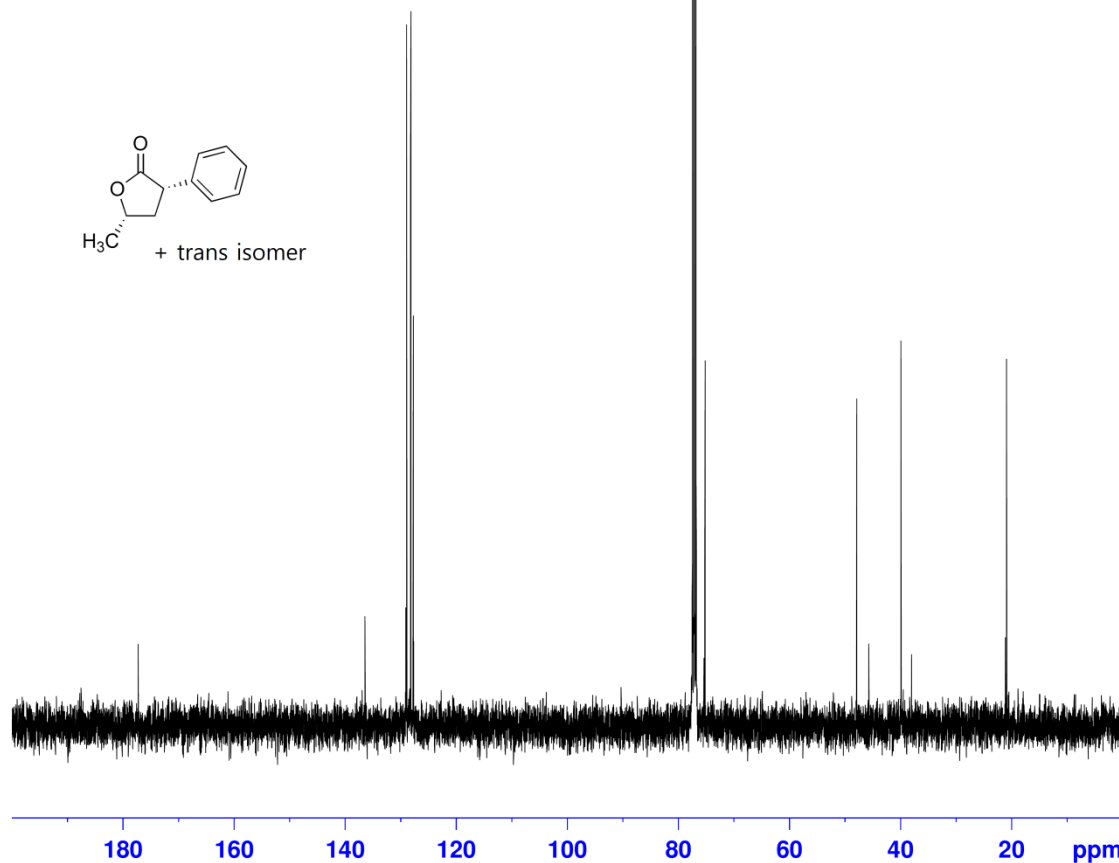

*cis*-3-(4-Bromophenyl)-5-phenyldihydrofuran-2(3*H*)-one (*cis*-4j)

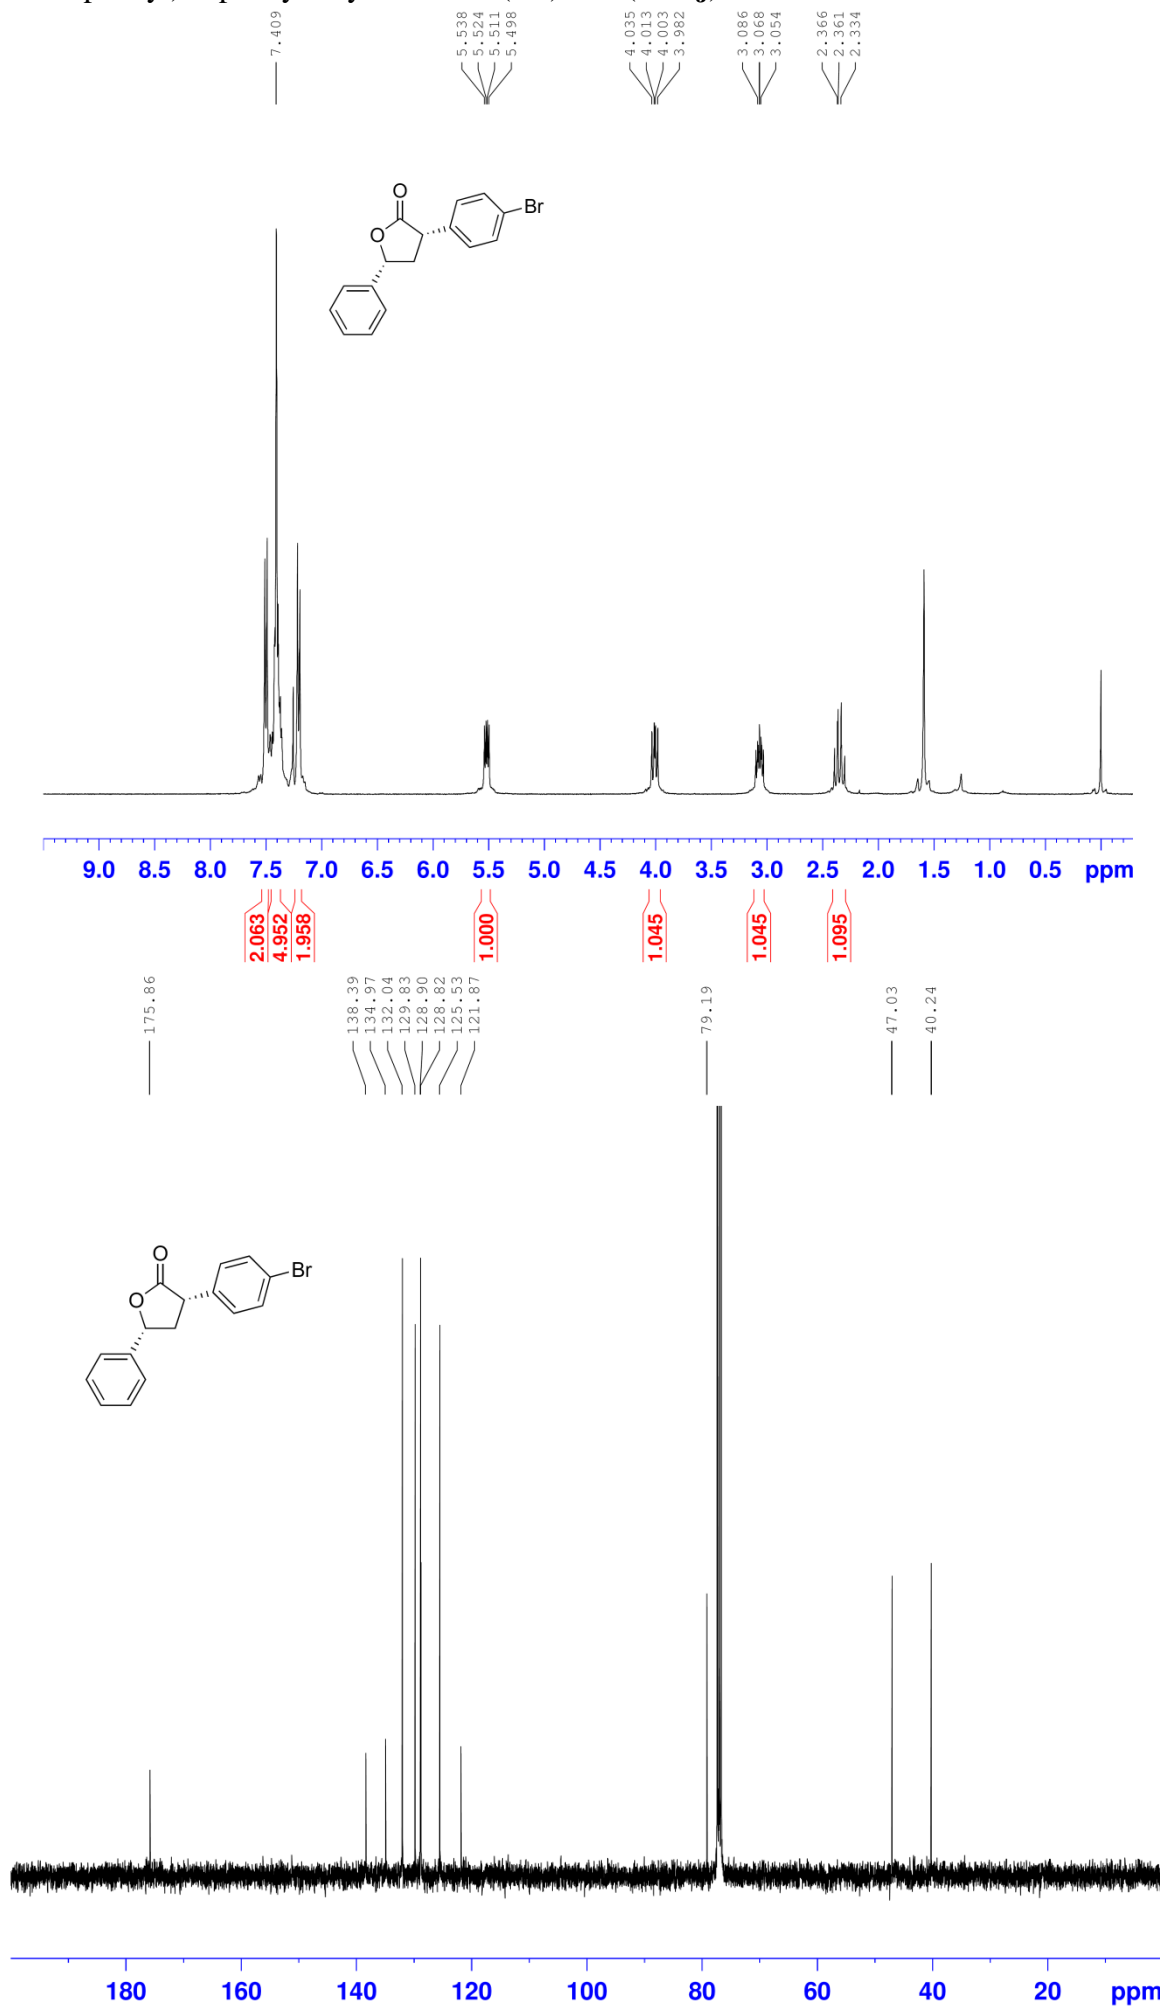

*cis*-3-(4-Chlorophenyl)-5-phenyldihydrofuran-2(3*H*)-one (*cis*-**4k**)

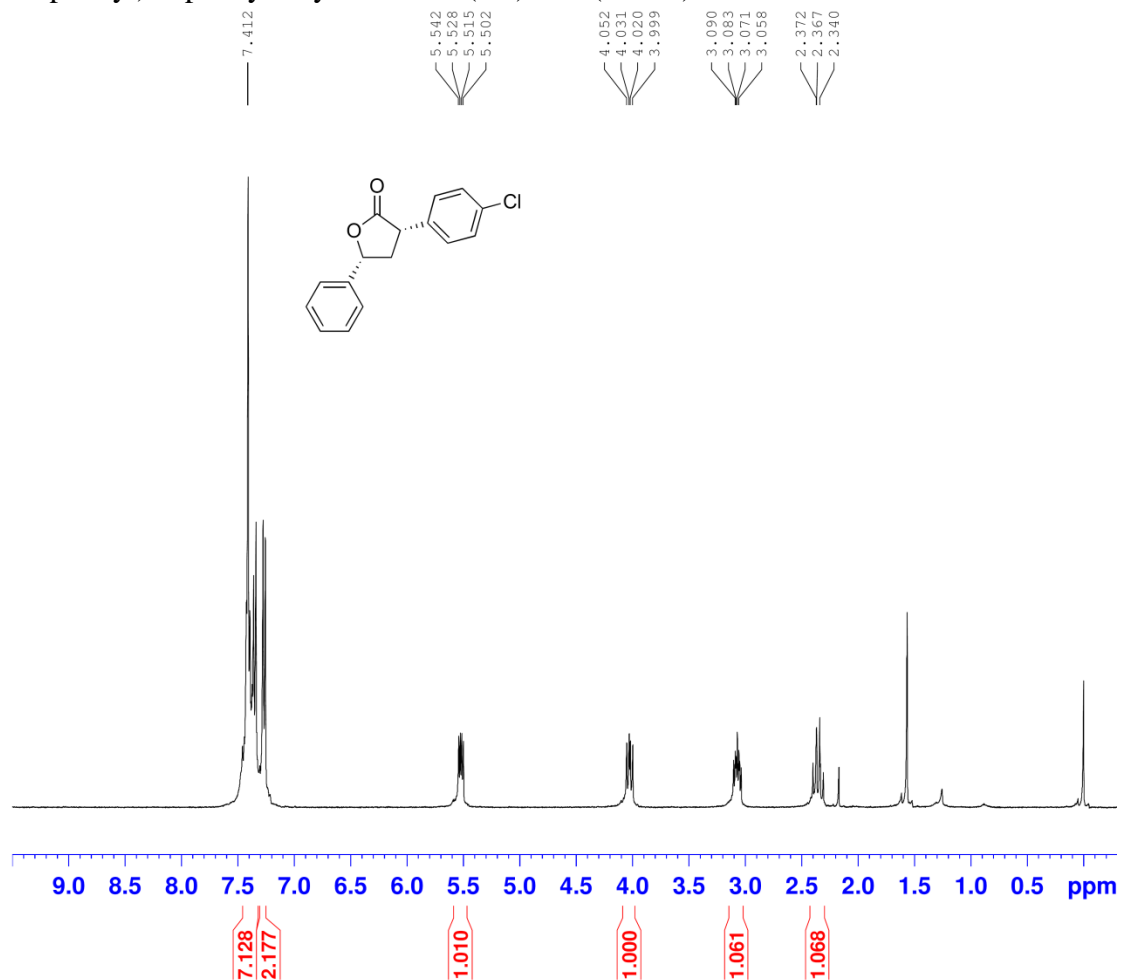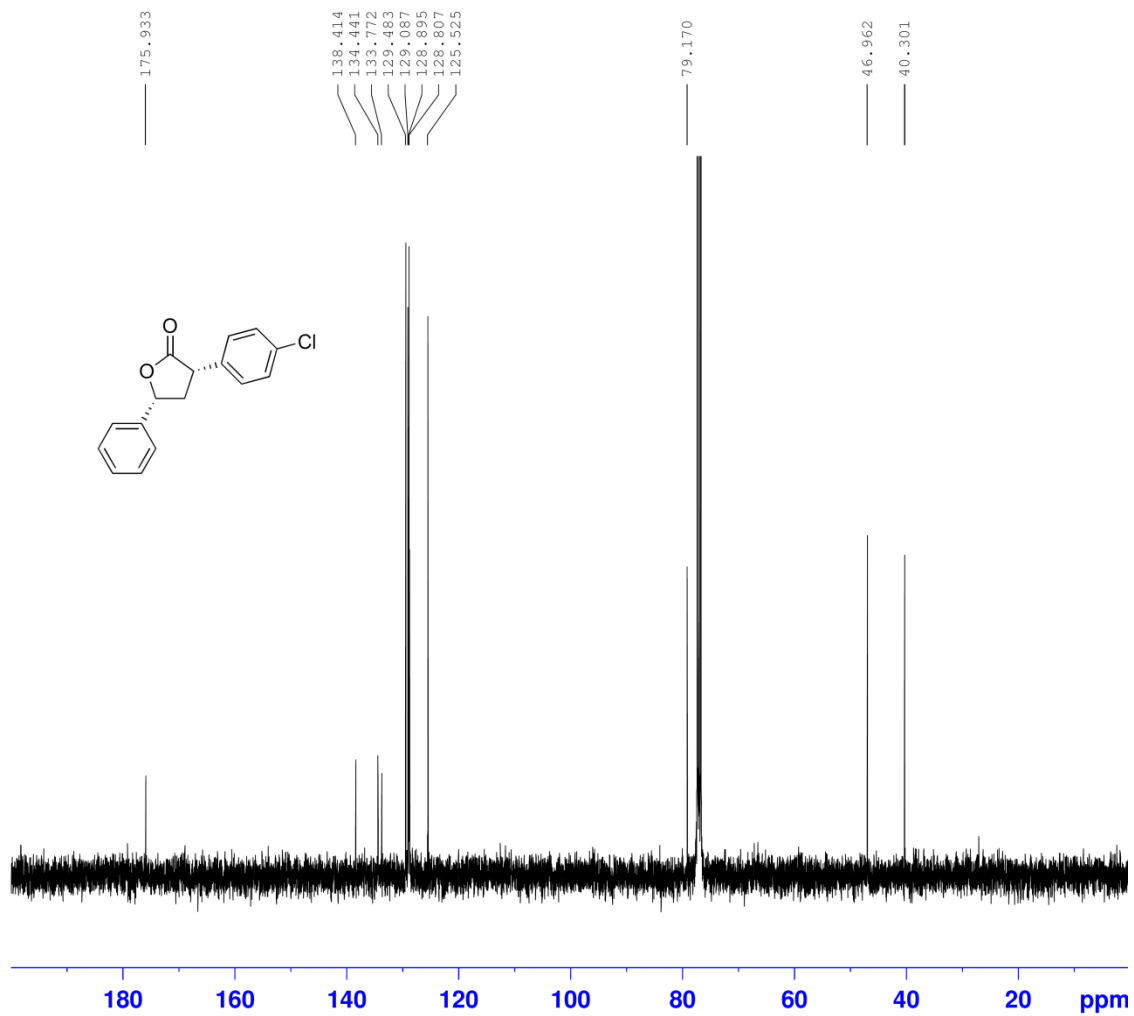



*cis*-2,4-Diphenyltetrahydrofuran (*cis*-5)

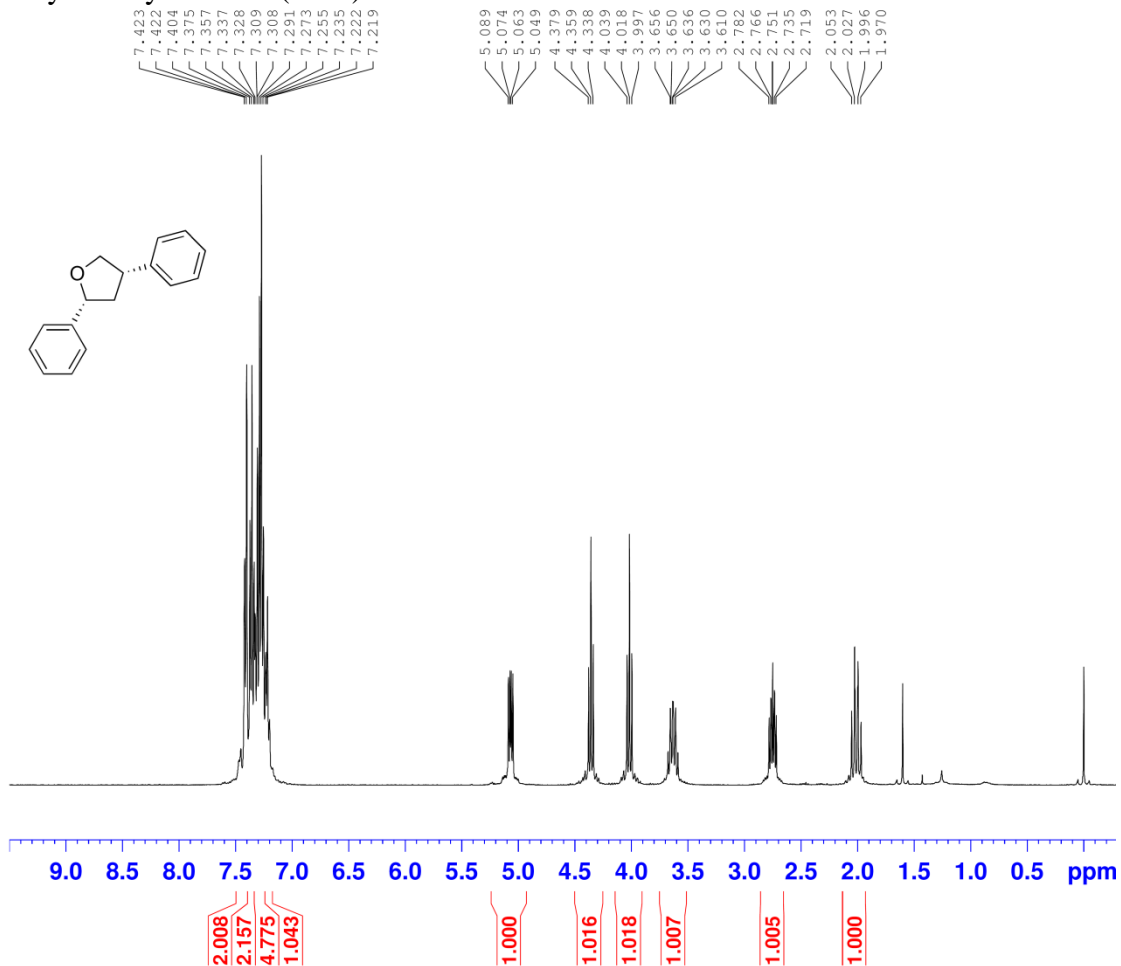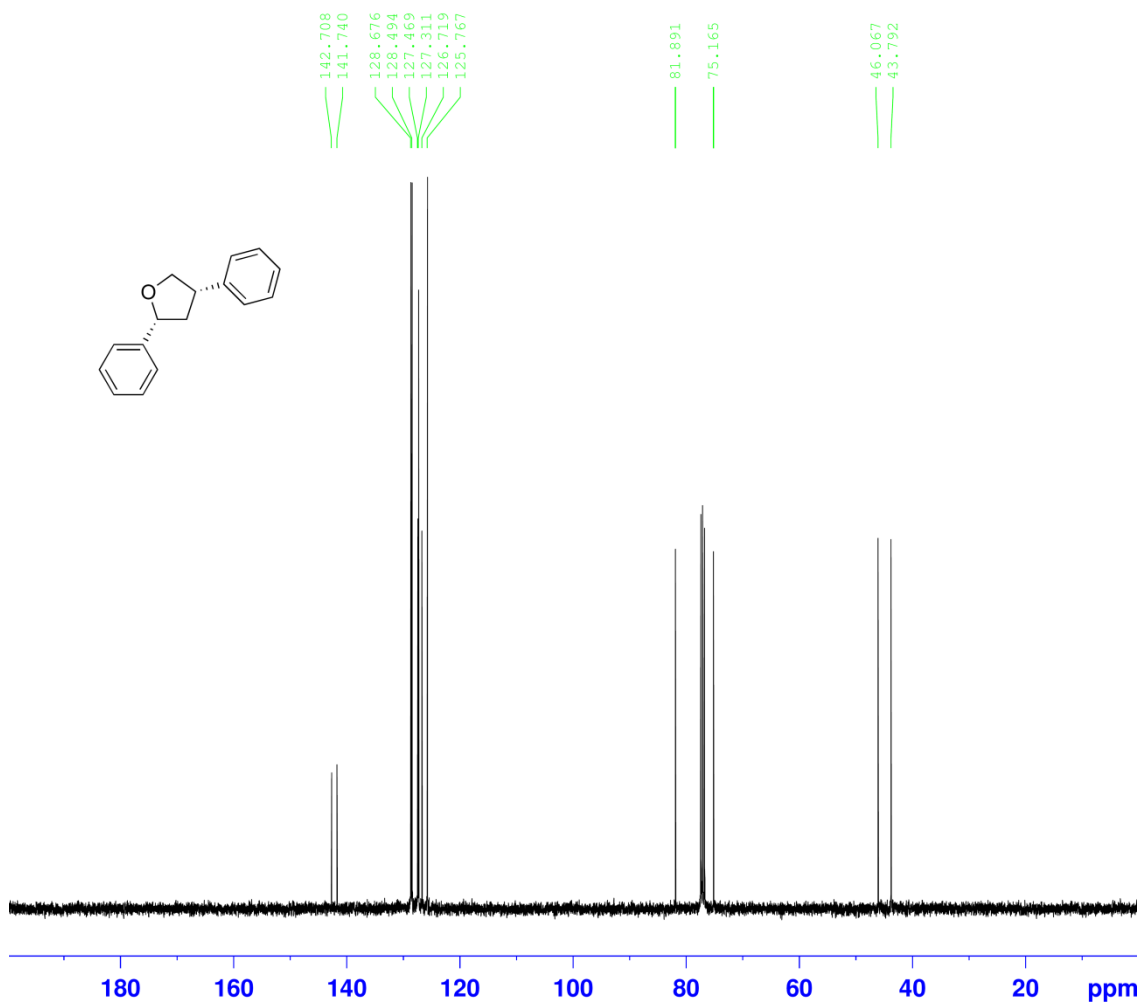



*cis*-2-(2-Naphthyl)-4-phenyltetrahydrofuran (*cis*-**6**)

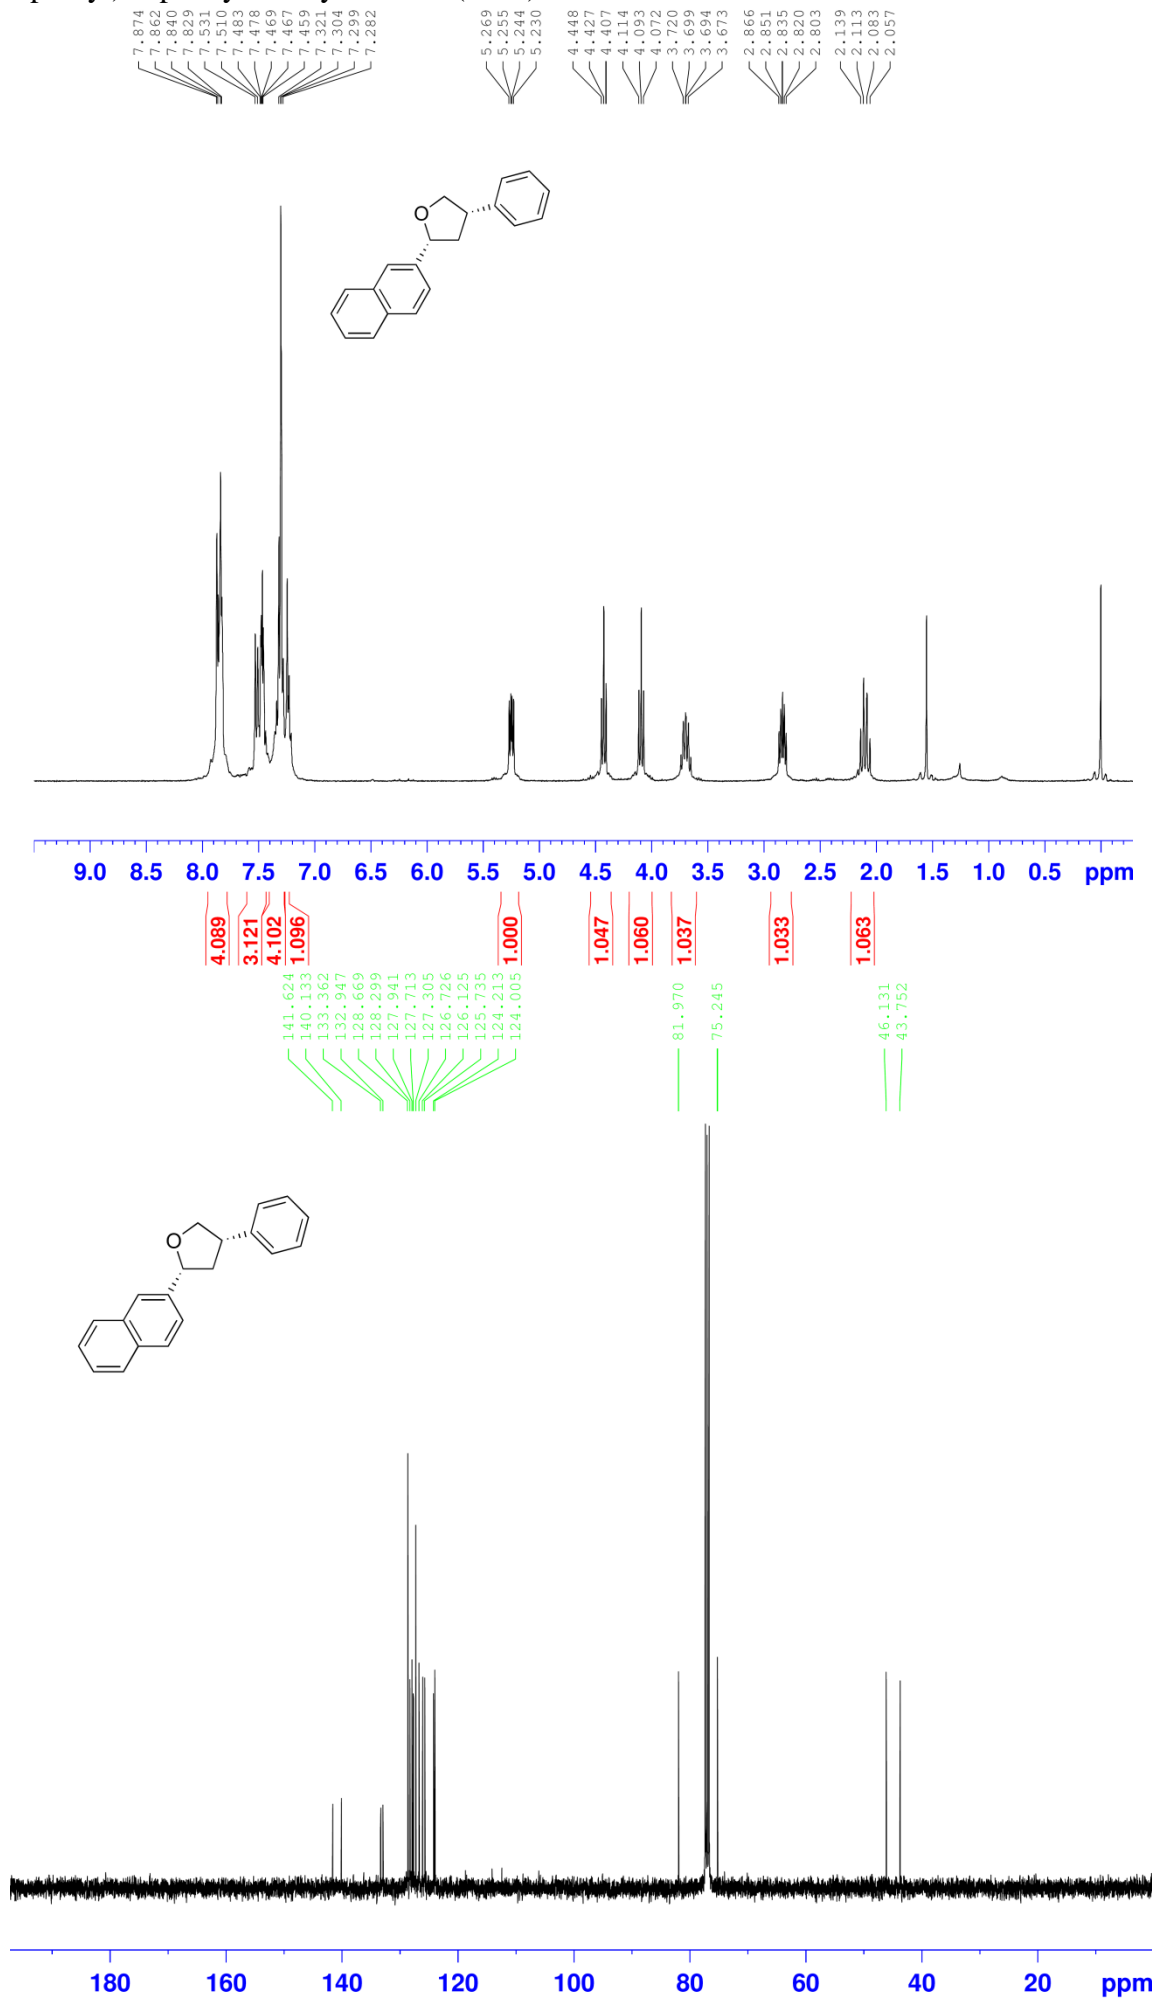

*trans*-2-(2-Naphthyl)-4-phenyltetrahydrofuran (*trans*-**6**)

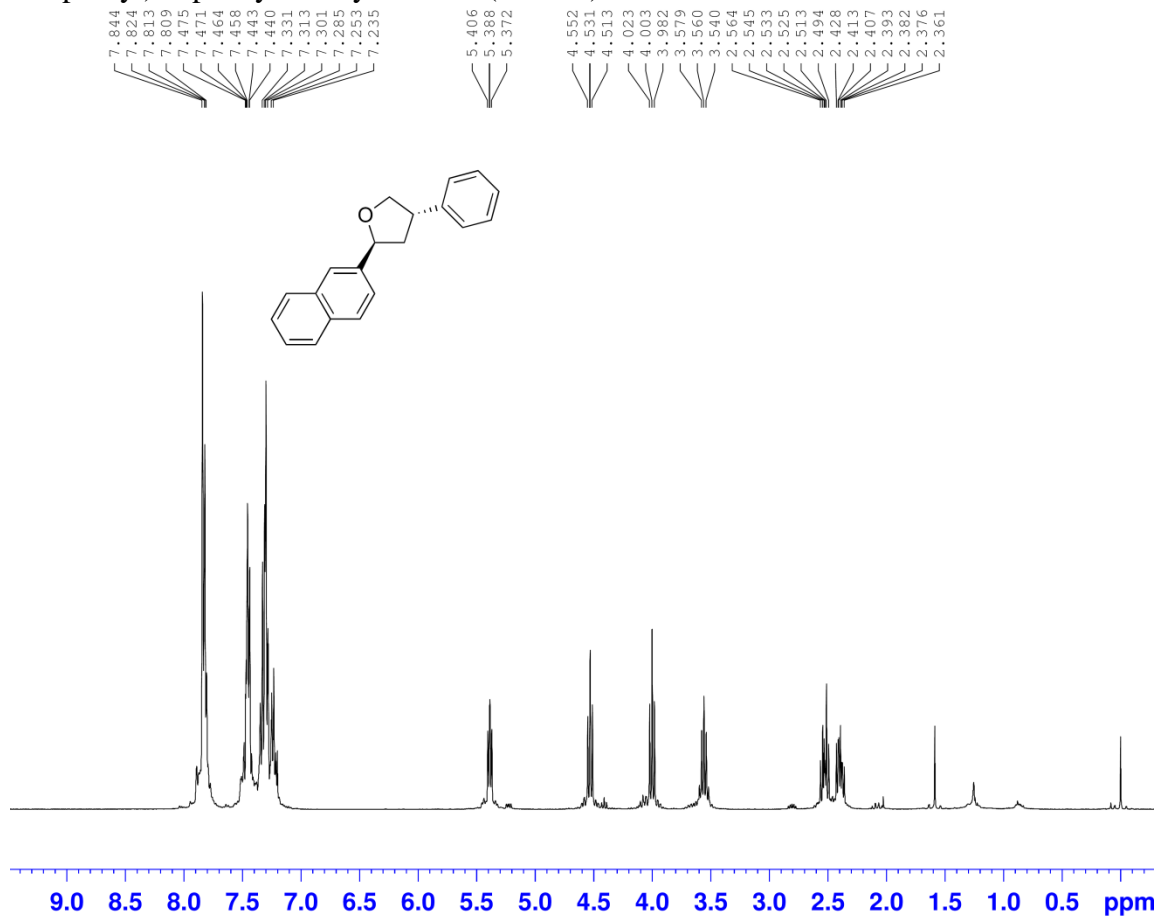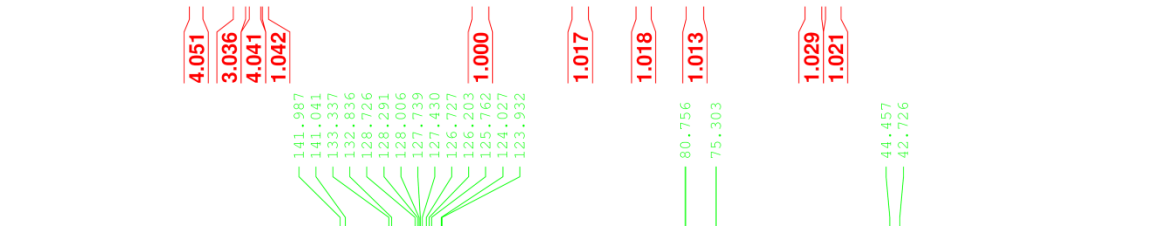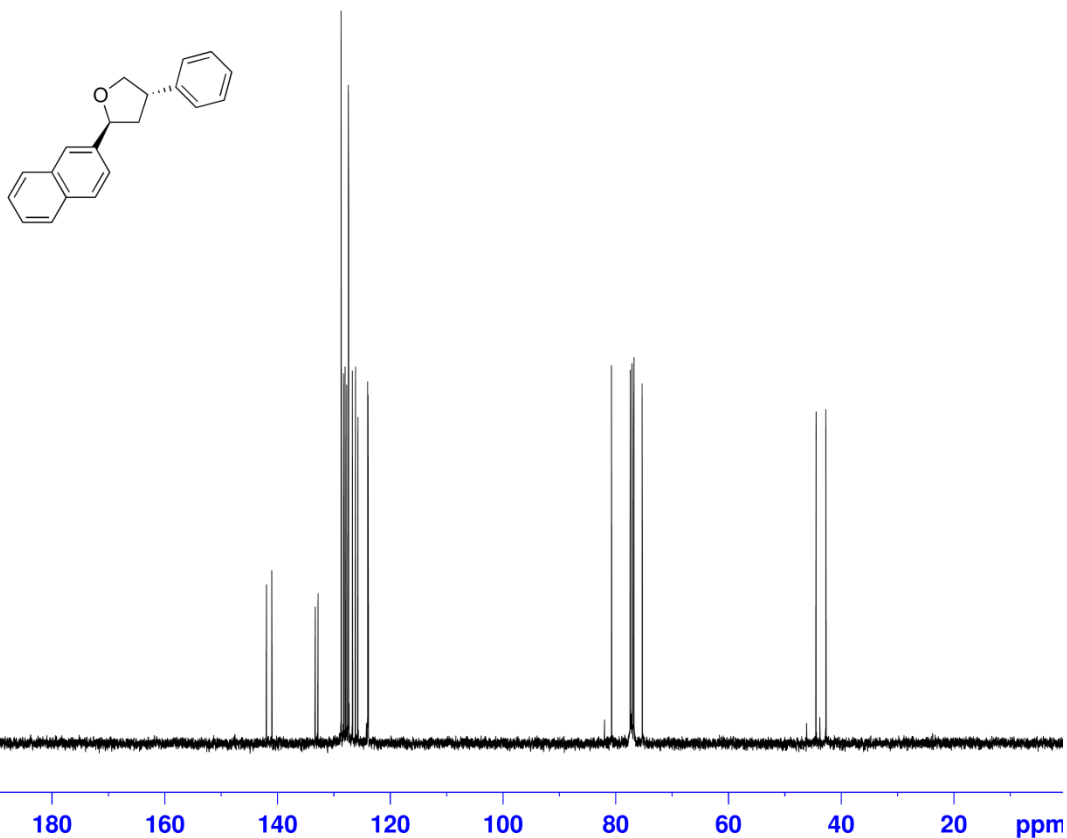

*cis*-2-(4-Methylphenyl)-4-phenyltetrahydrofuran (*cis*-7)

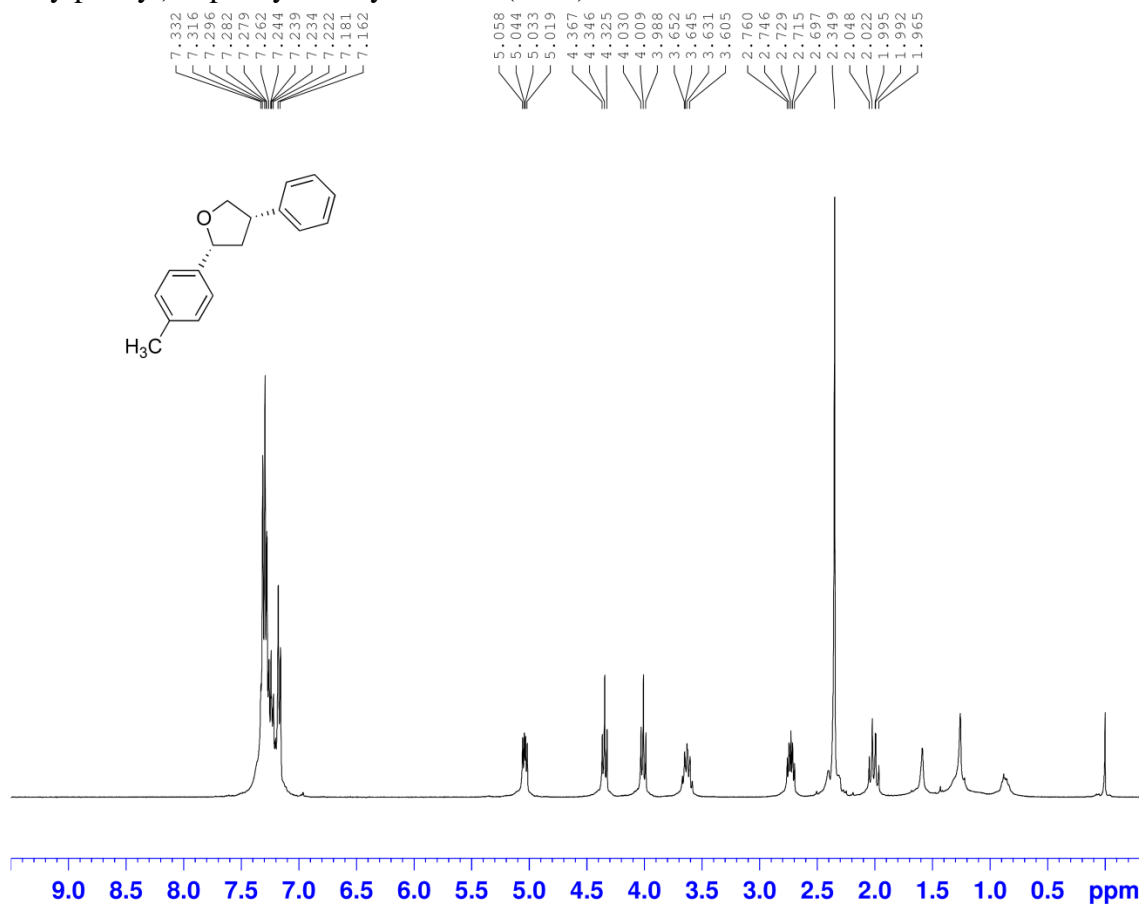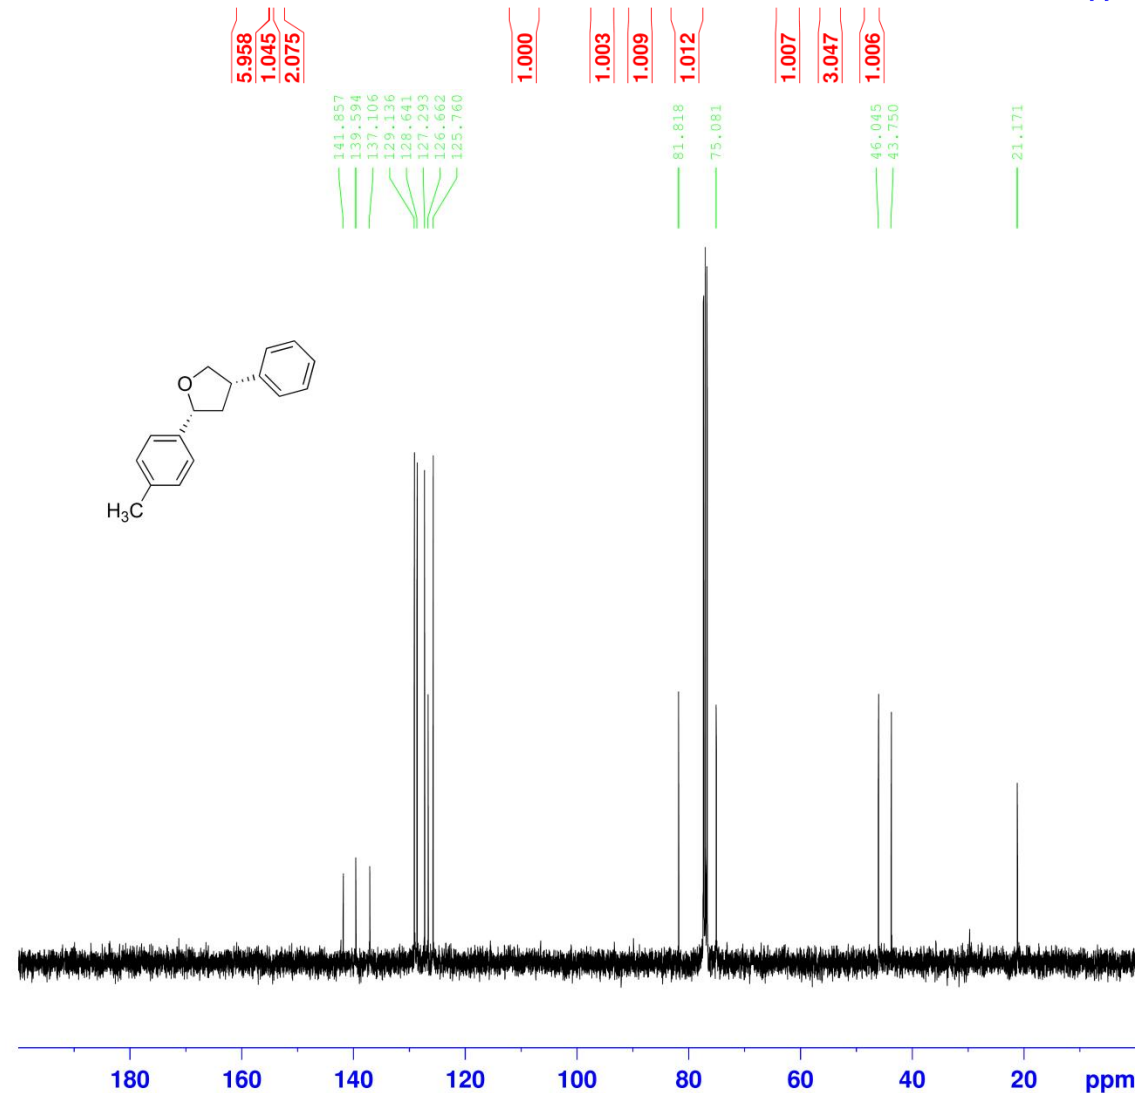

*trans*-2-(4-Methylphenyl)-4-phenyltetrahydrofuran (*trans*-7)

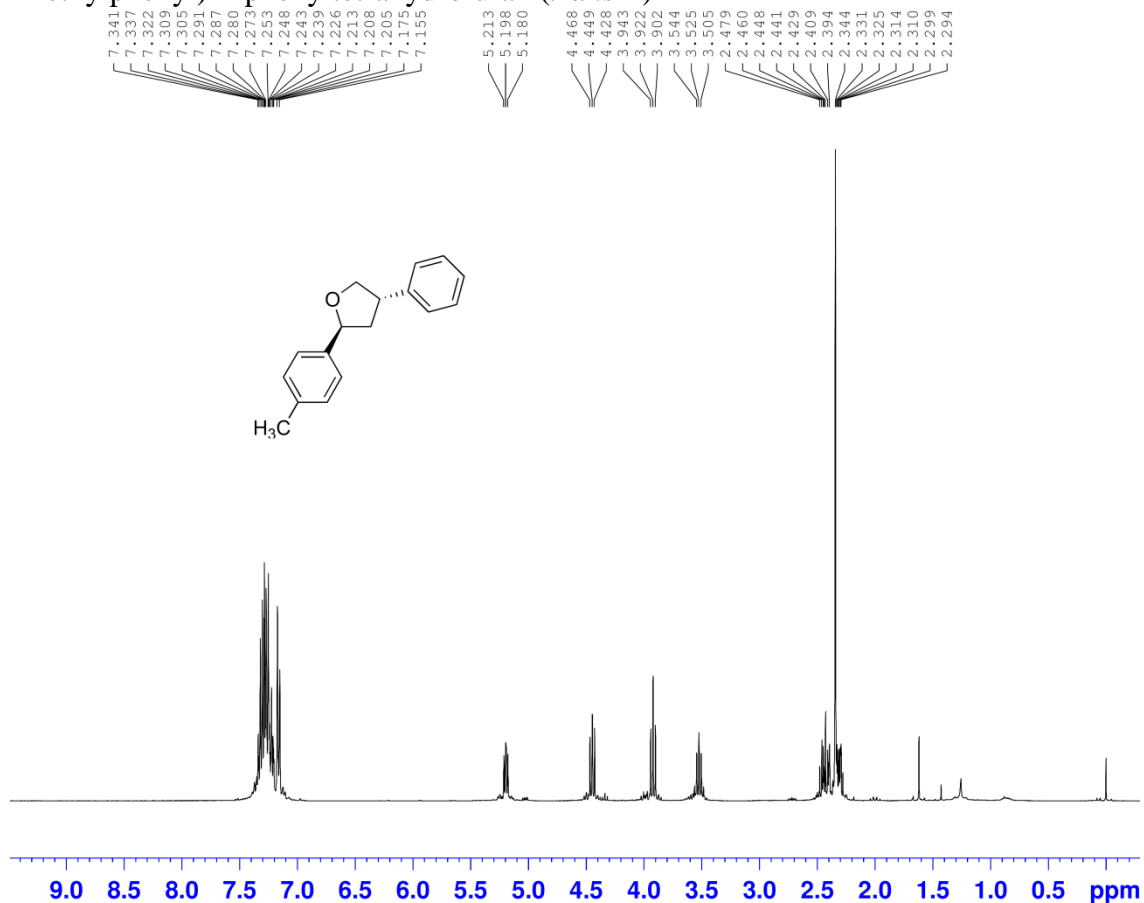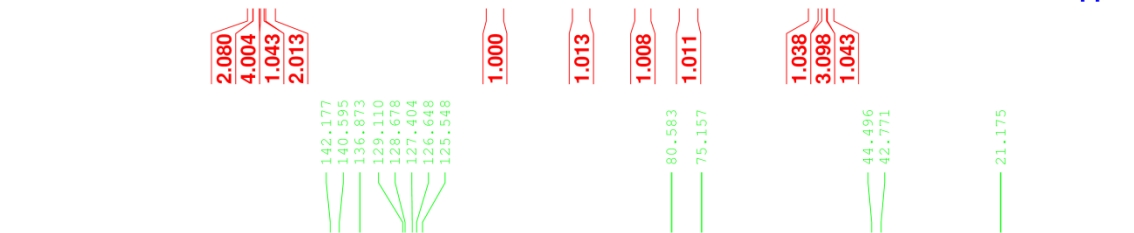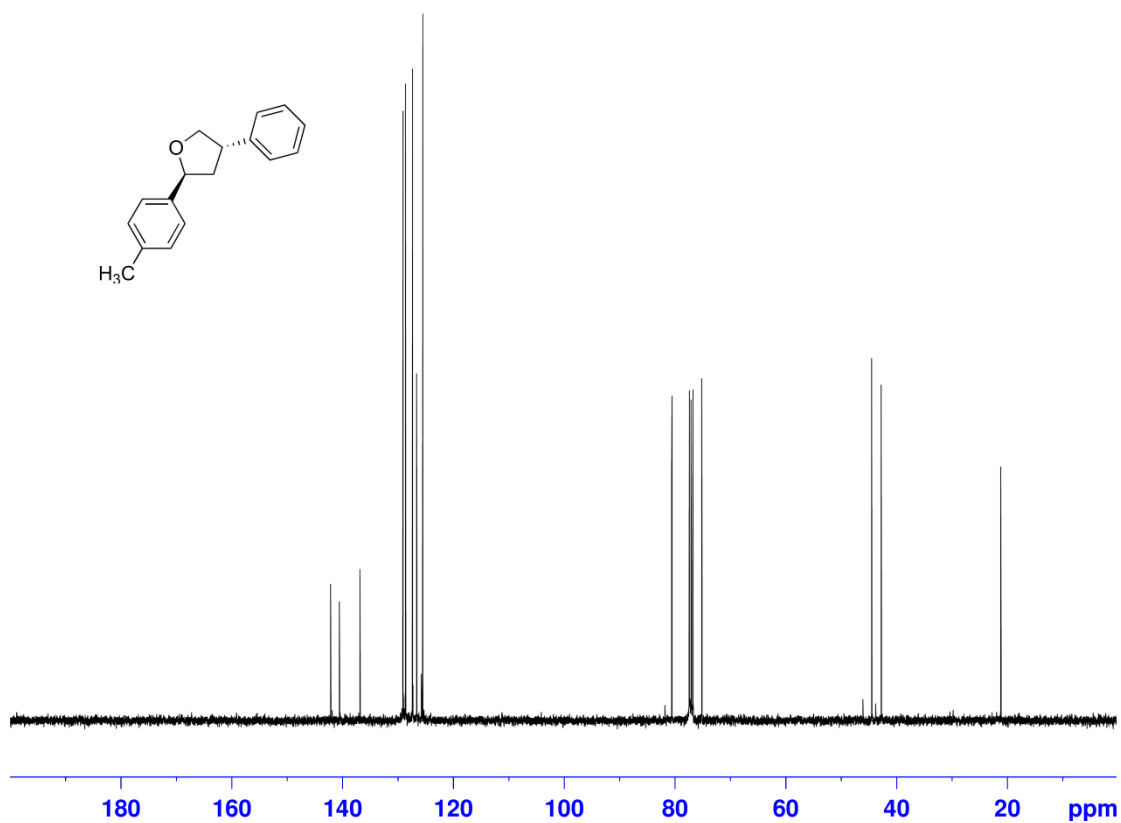

*cis*-2-(4-Chlorophenyl)-4-phenyltetrahydrofuran (*cis*-**8**)

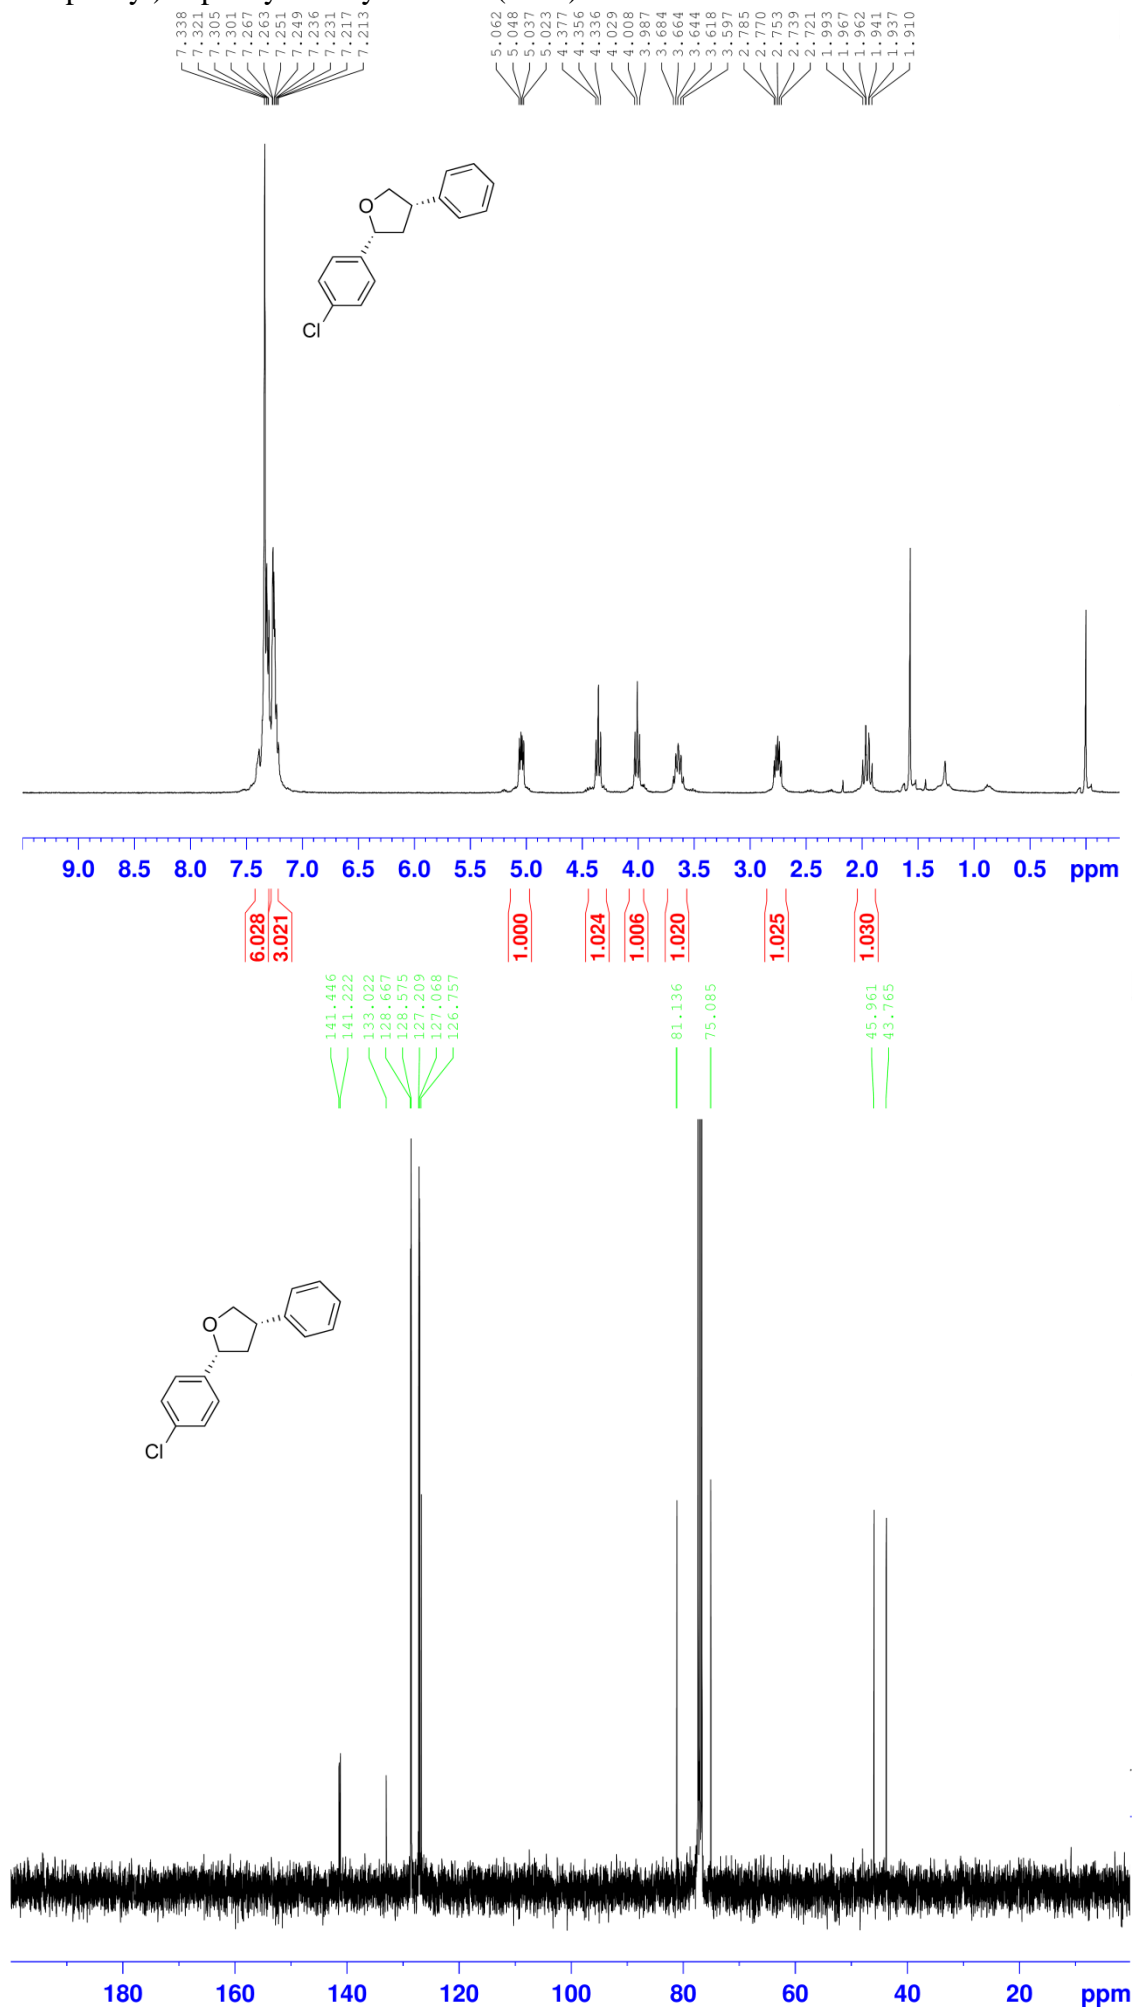

*trans*-4-(4-Chlorophenyl)-2-phenyltetrahydrofuran (*trans*-**9**)

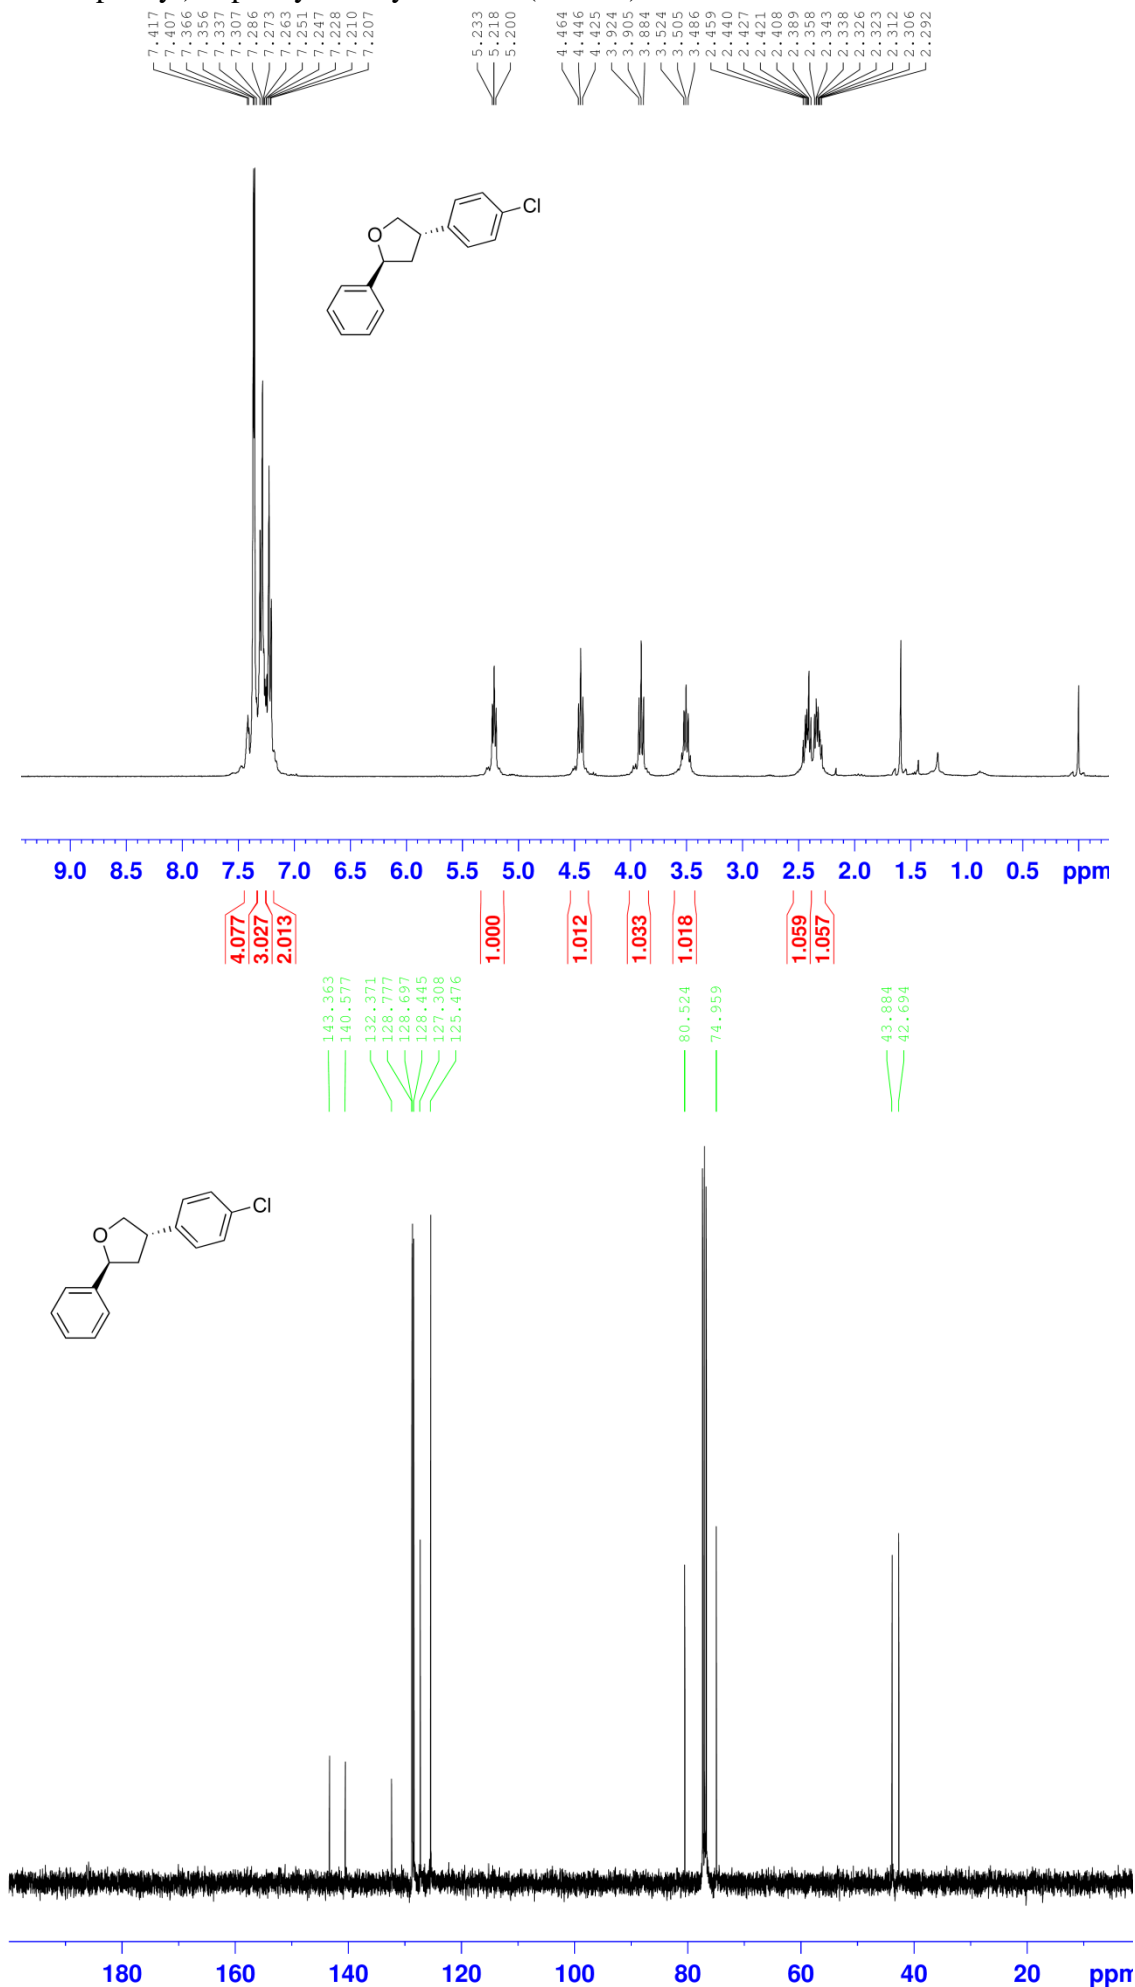



### 3: Chiralcel OD, 2% IPA/HXN, 0.5 ml/min

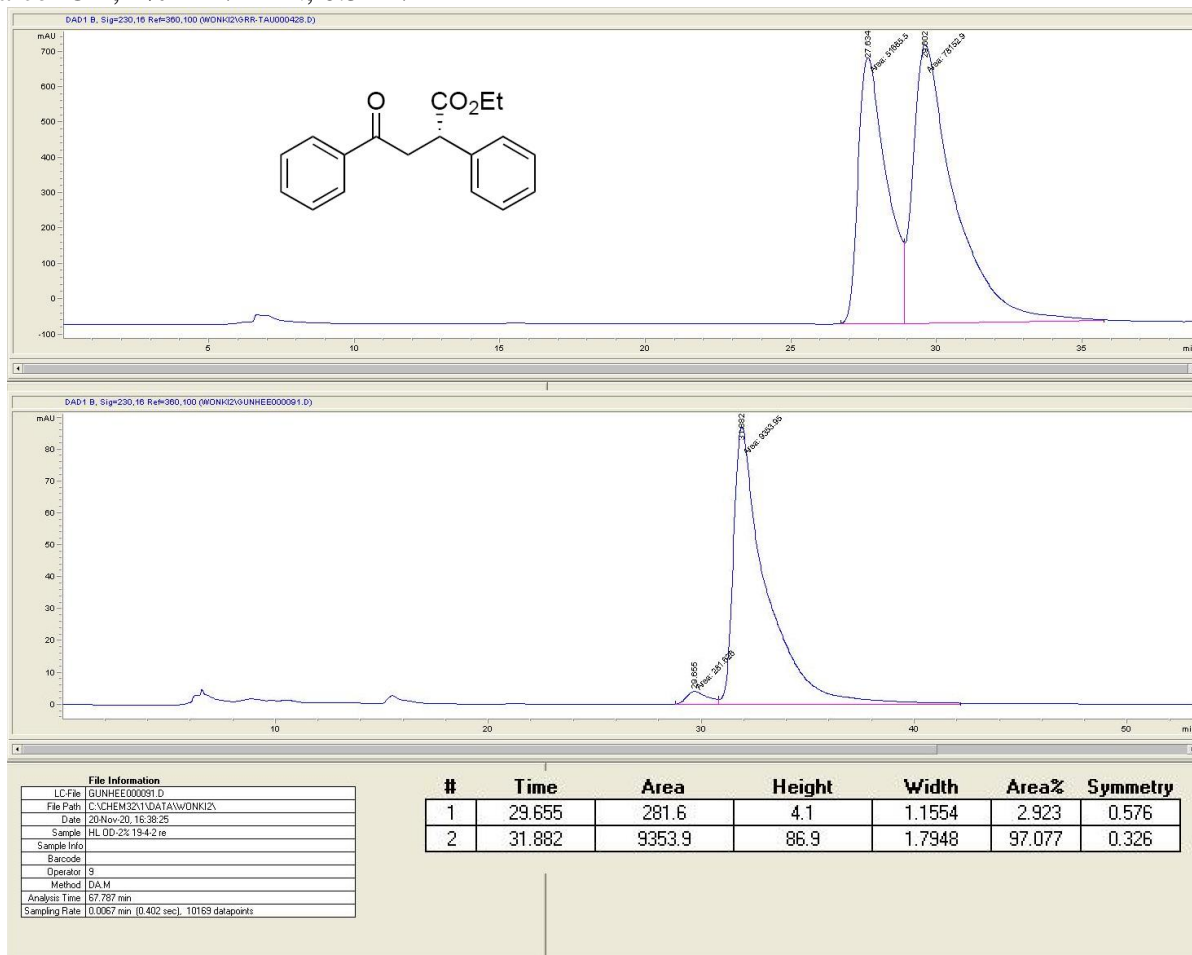

### cis-4a: Chiralcel OB-H, 40% IPA/HXN, 0.5 ml/min

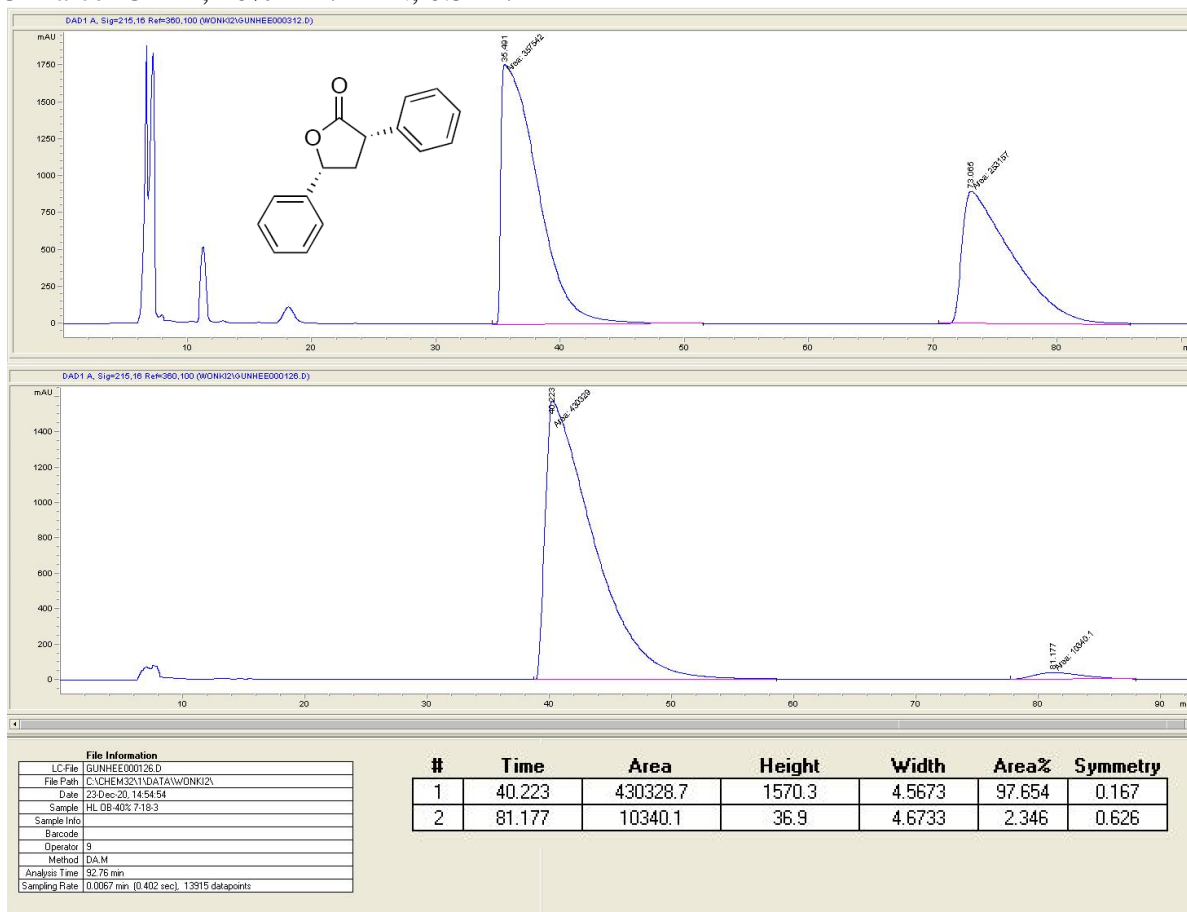

*trans*-4a: Chiralcel OD, 20% IPA/HXN, 0.5 ml/min

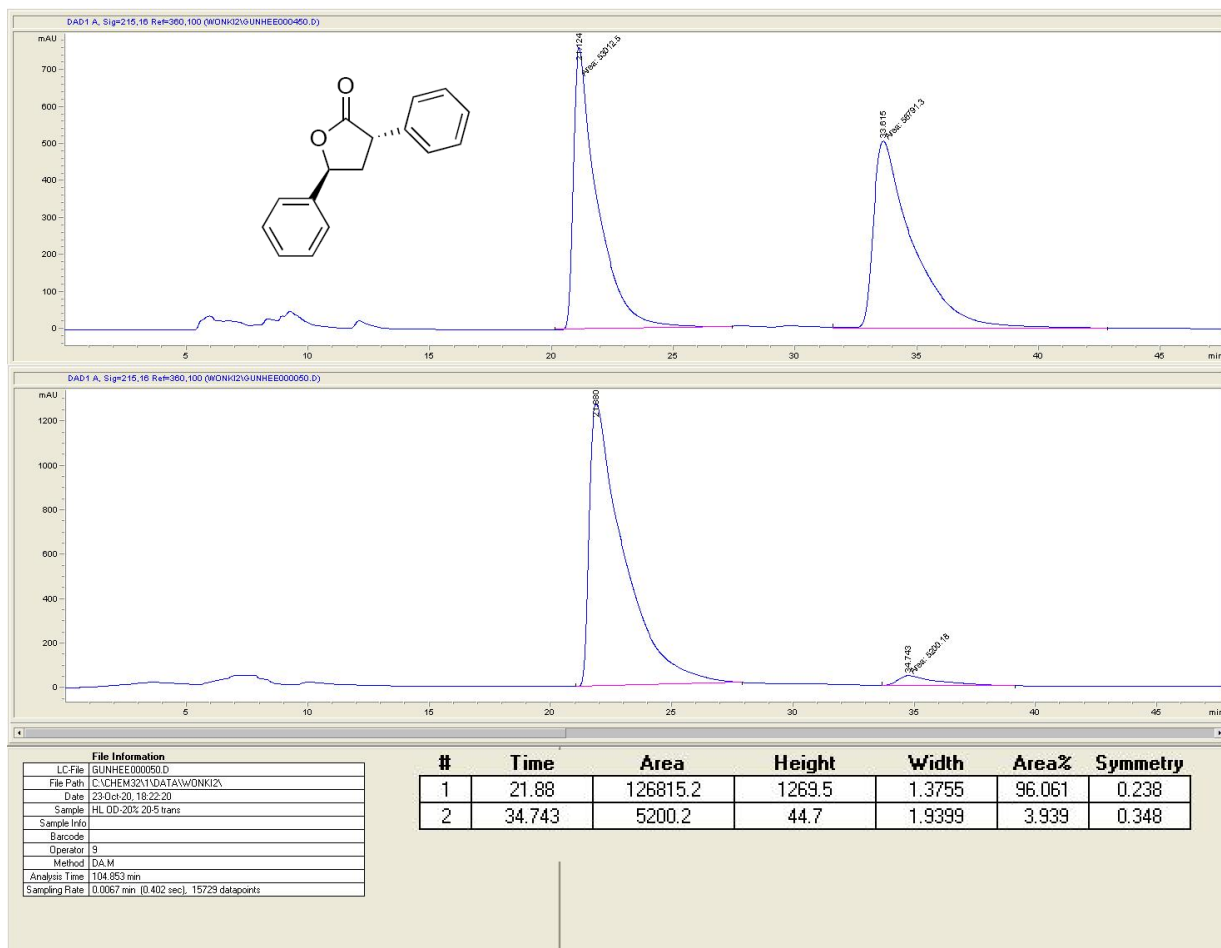

*cis*-4b: Chiralcel OB-H, 40% IPA/HXN, 1.0 ml/min

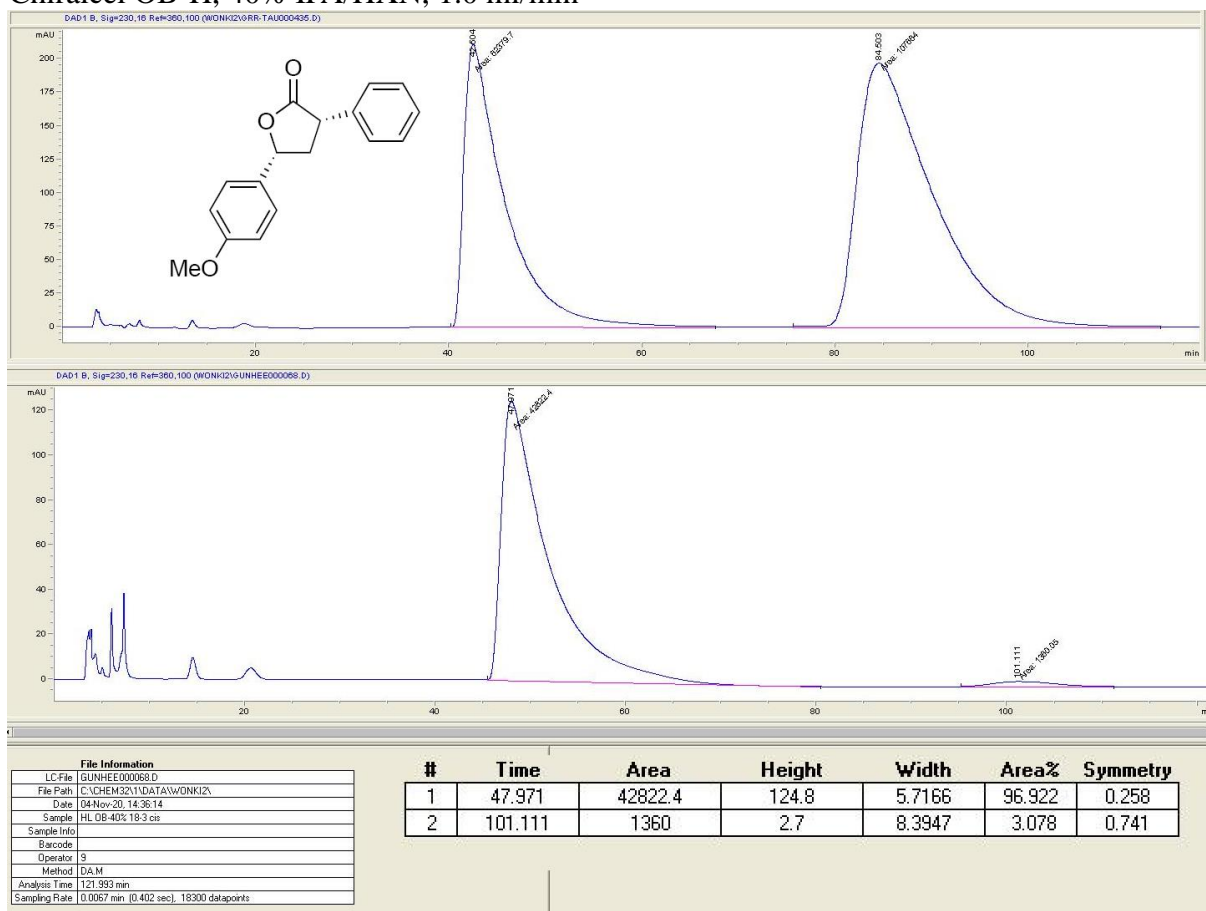

*cis-4c*: Chiralcel OB-H, 40% IPA/HXN, 1.0 ml/min

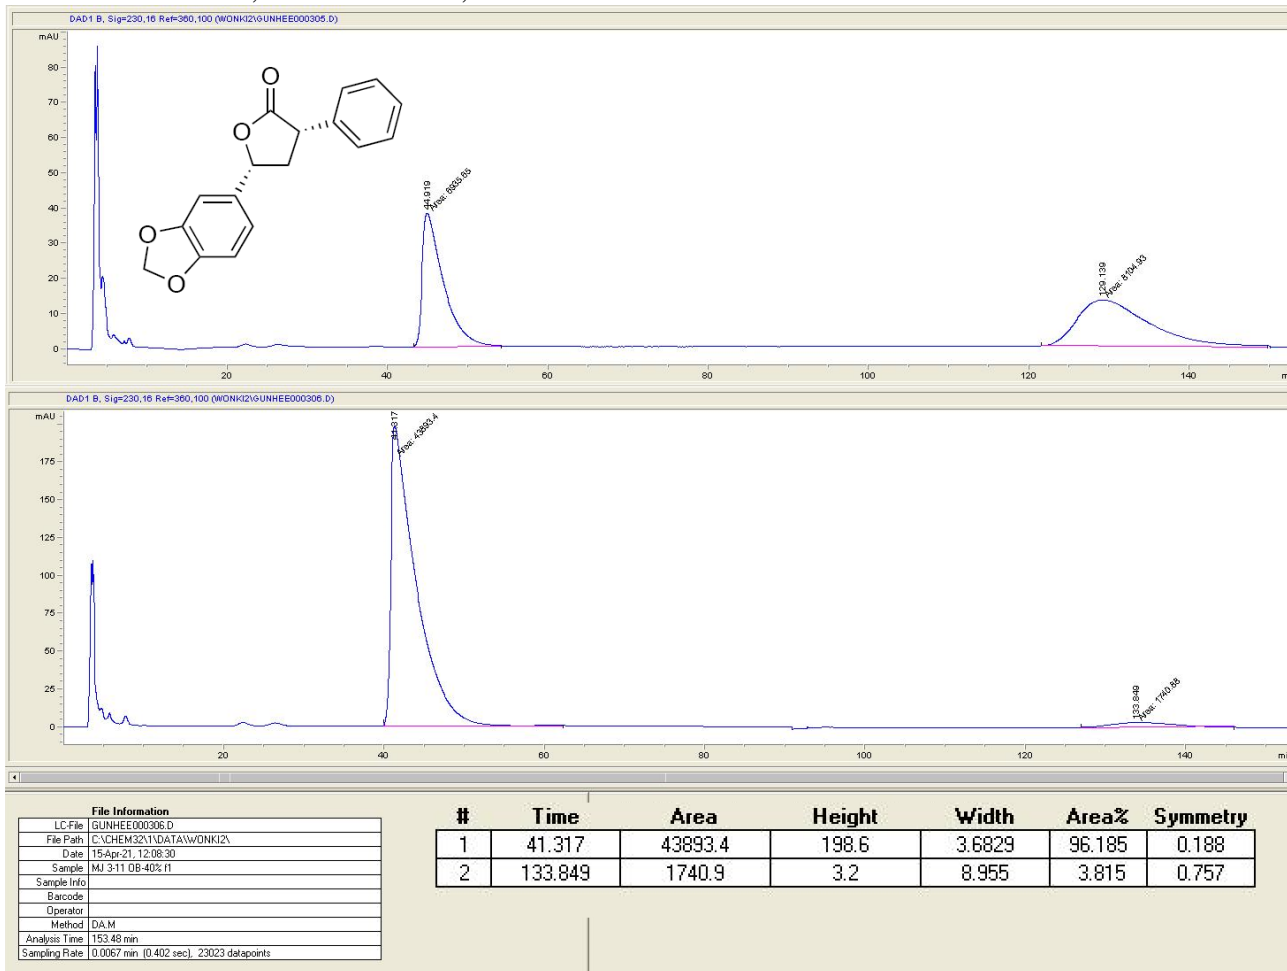

*cis-4d*: Chiralcel OB-H, 40% IPA/HXN, 1.0 ml/min

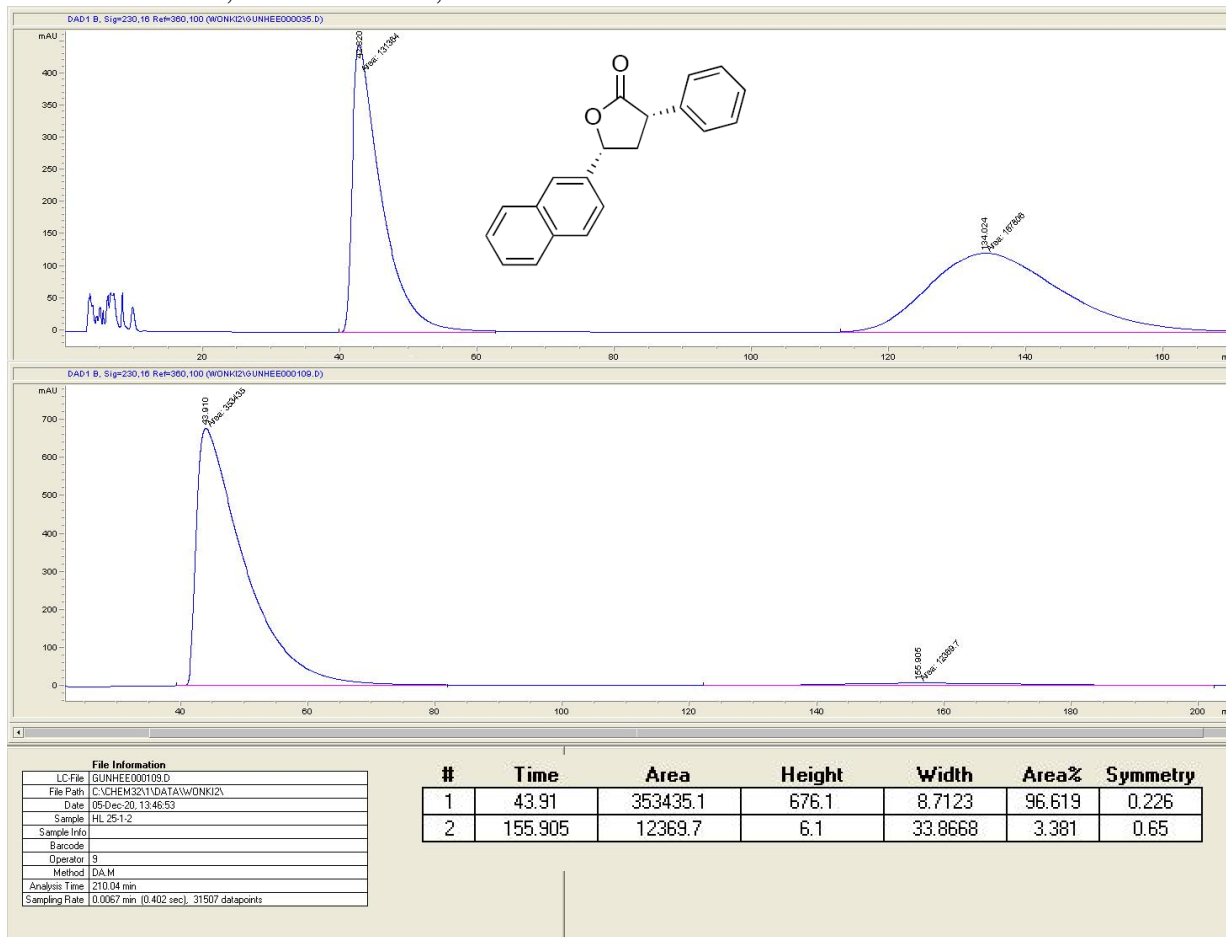

*cis-4e*: Chiralcel OB-H, 40% IPA/HXN, 1.0 ml/min

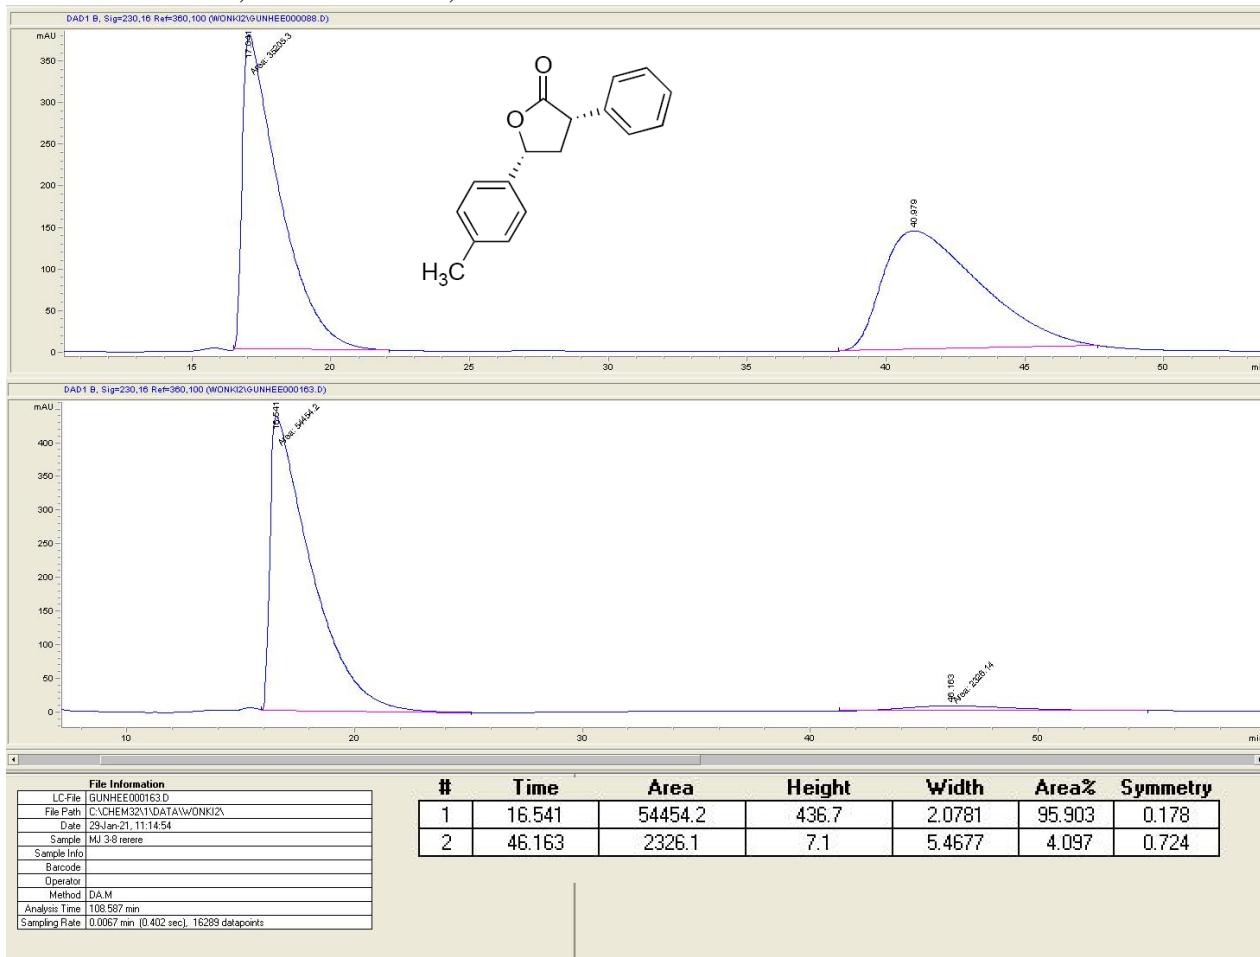

*cis-4f*: Chiralcel OJ-H, 20% IPA/HXN, 1.0 ml/min

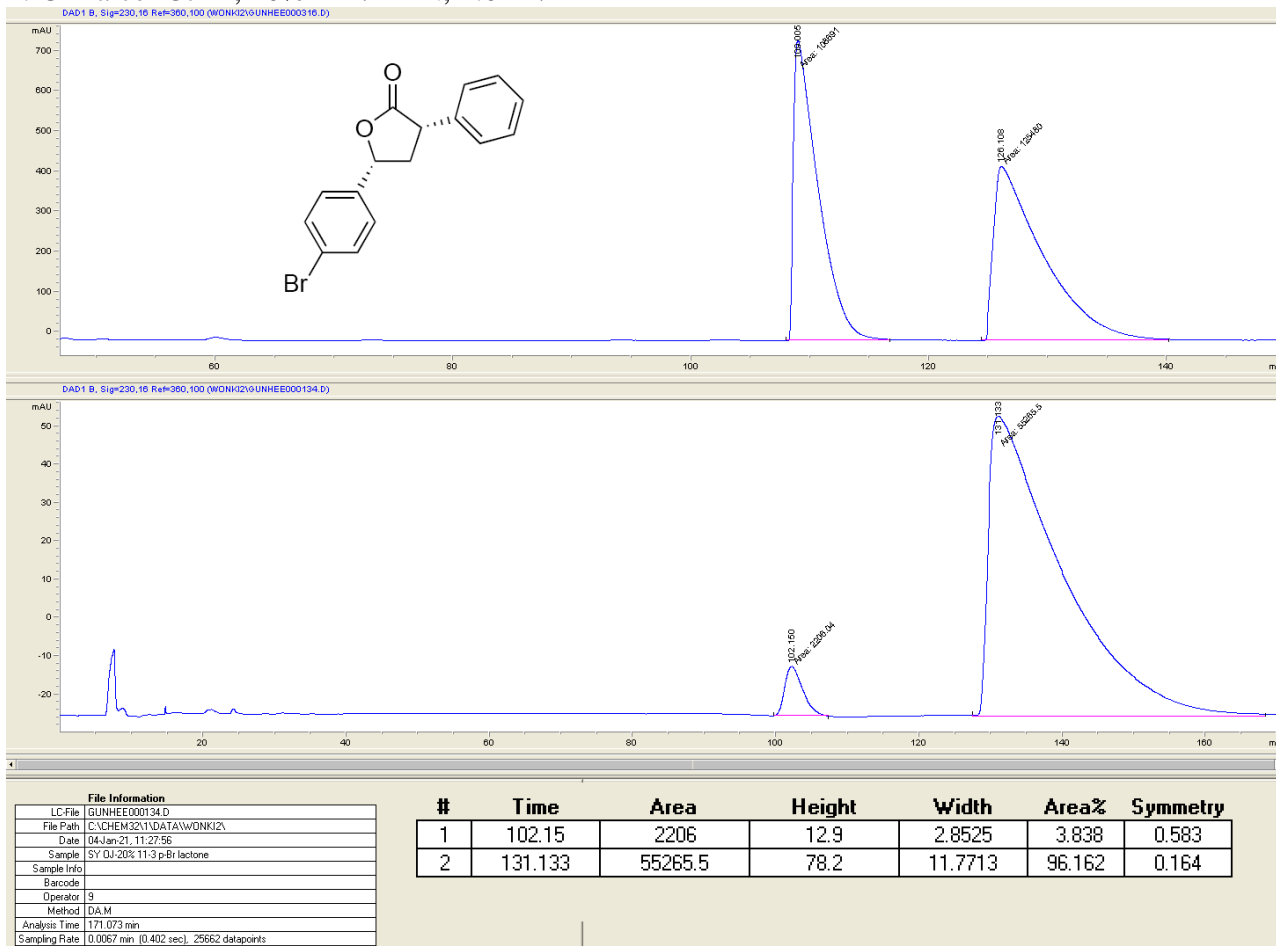

**cis-4g:** Chiralcel OB-H, 40% IPA/HXN, 1.0 ml/min

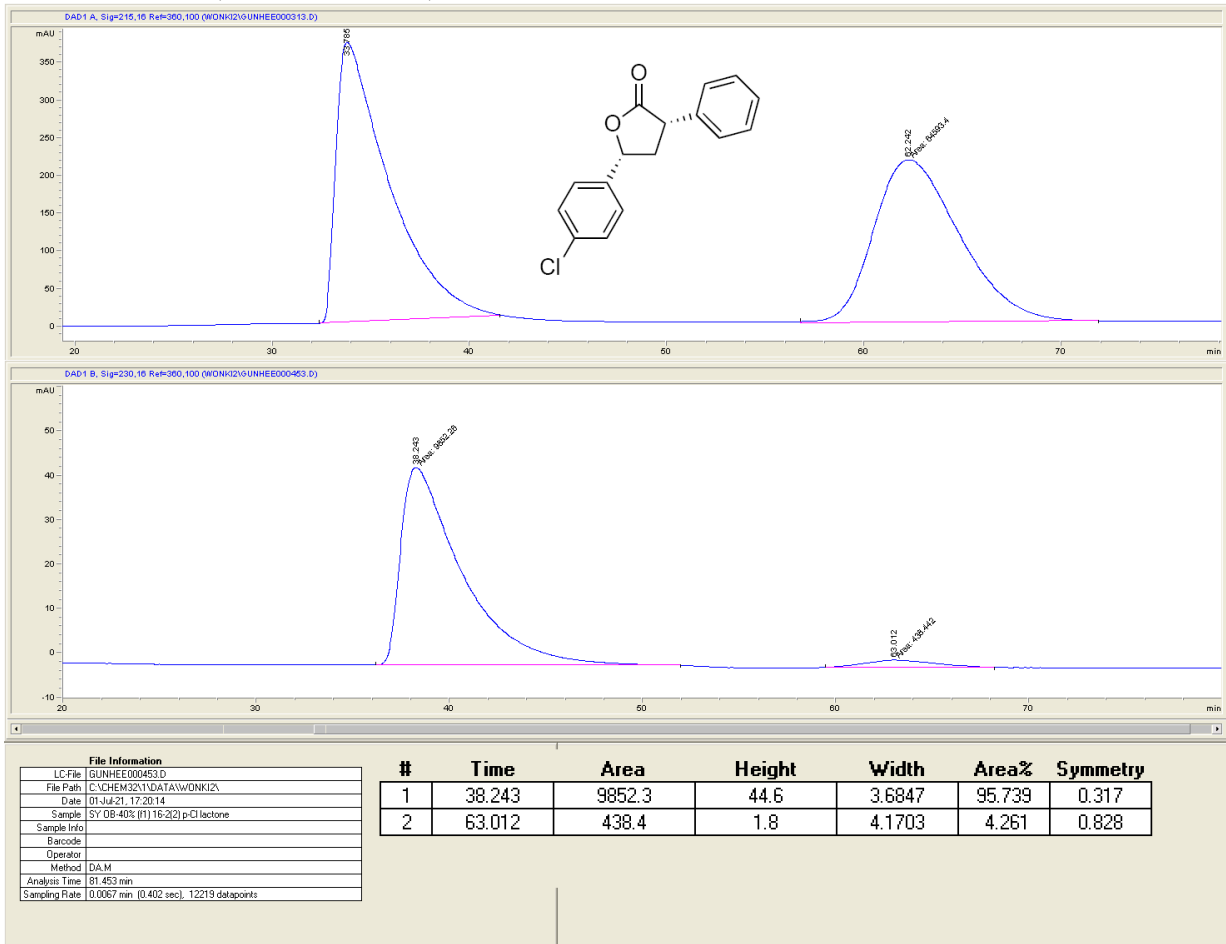

**cis-4h:** Chiralcel OB-H, 40% IPA/HXN, 1.0 ml/min

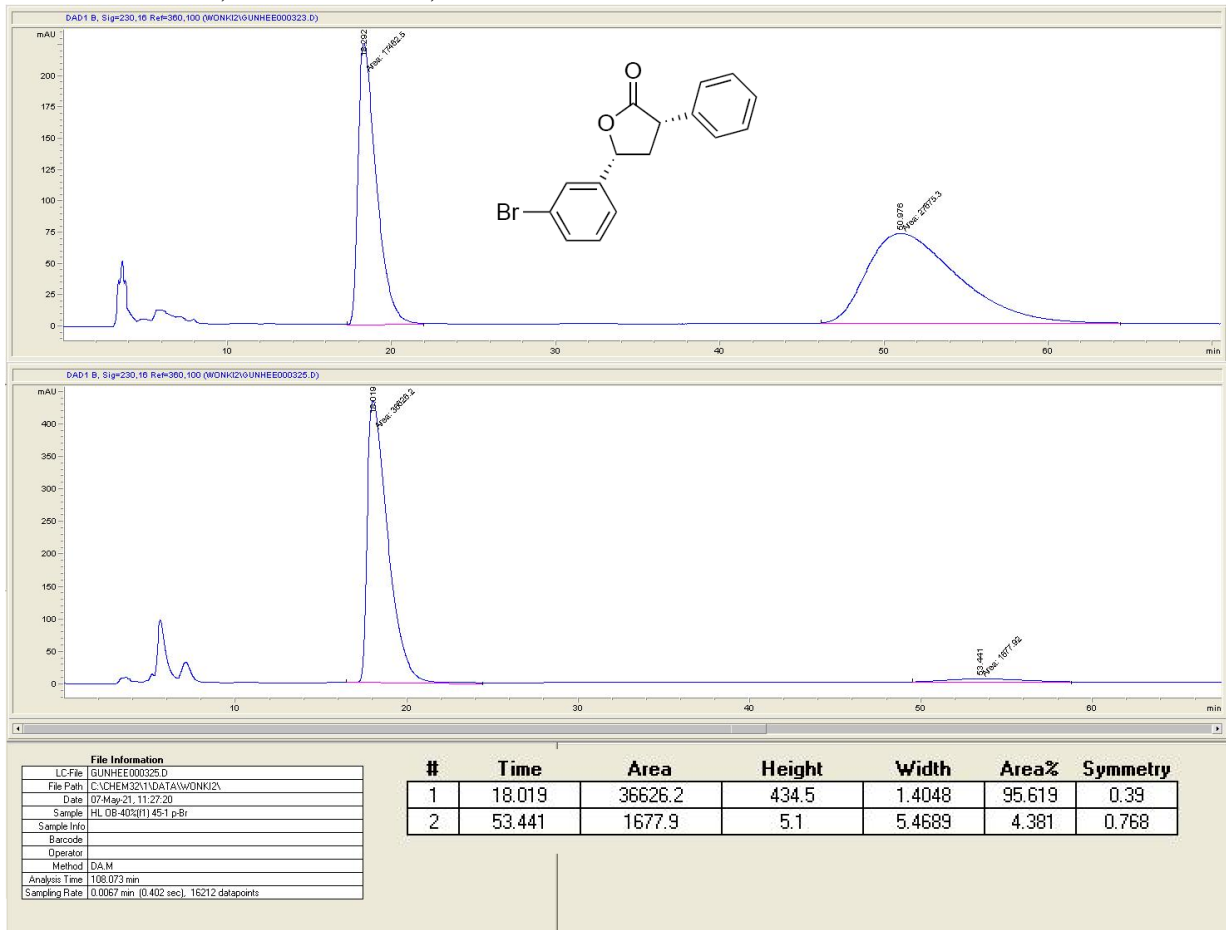

**cis-4i:** Chiralcel OB-H, 40% IPA/HXN, 0.5 ml/min

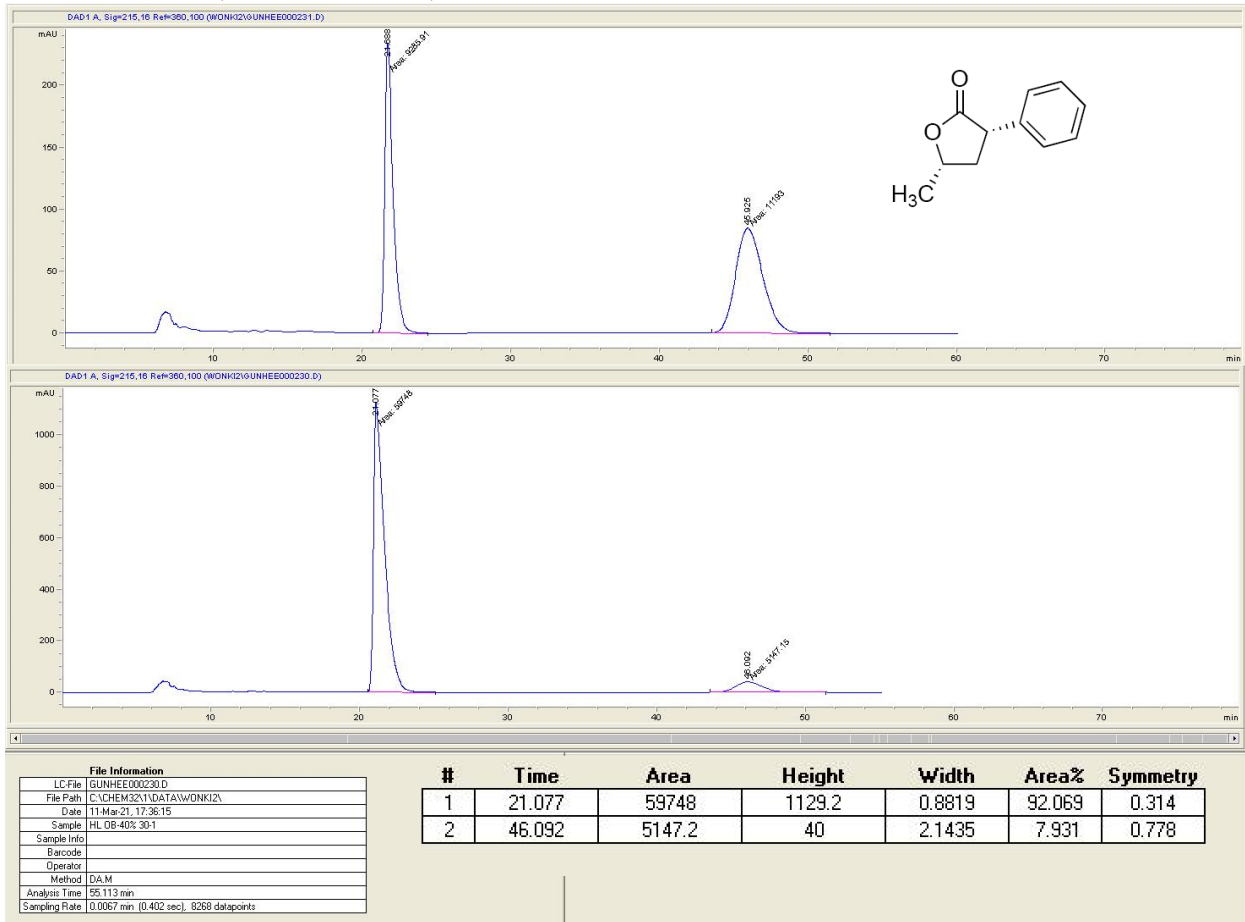

**cis-4j:** Chiralcel OJ-H, 40% IPA/HXN, 0.5ml/min

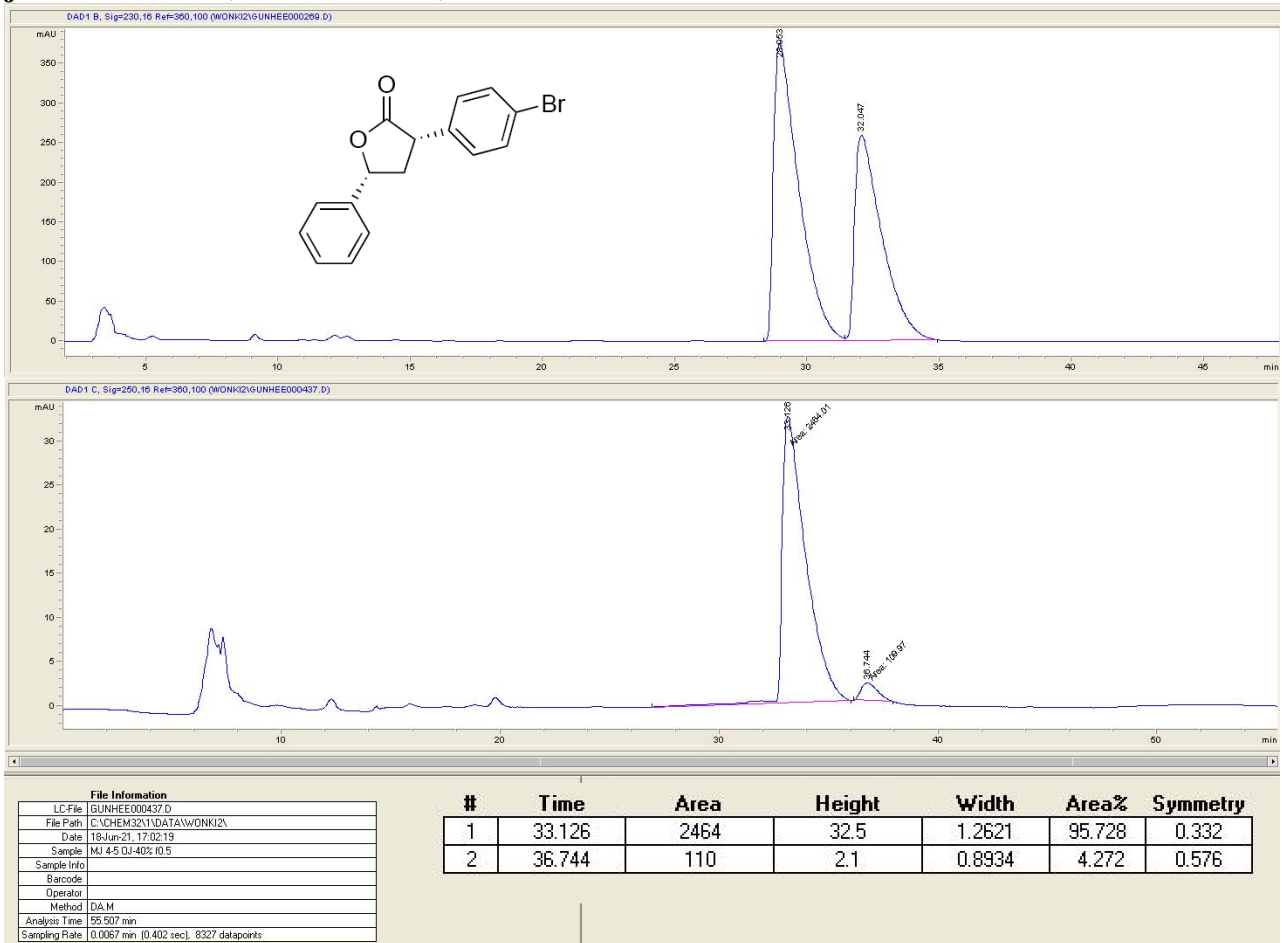

*cis-4k*: Chiralcel OJ-H, 40% IPA/HXN, 0.5ml/min

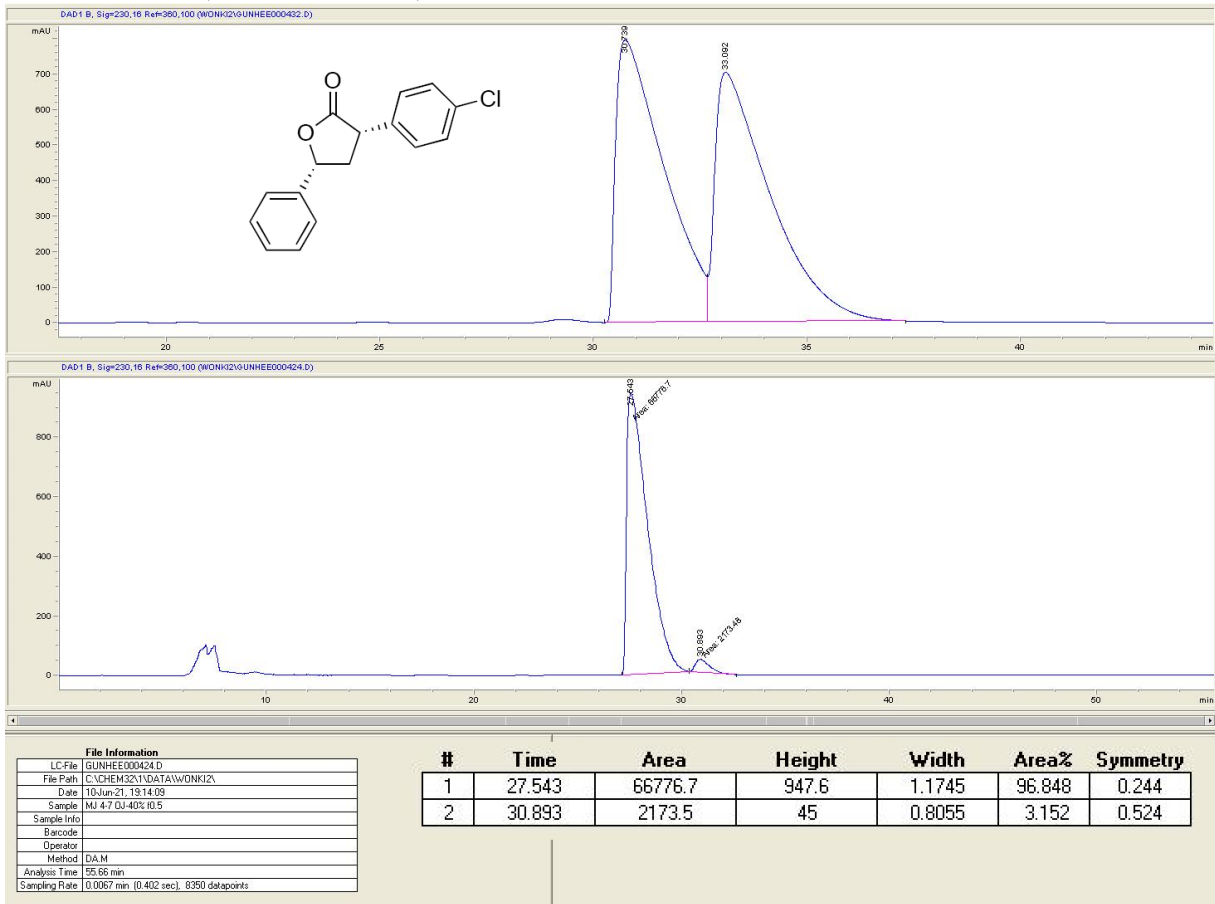

*cis-5*: Chiralcel OB-H, 5% IPA/HXN, 0.5ml/min

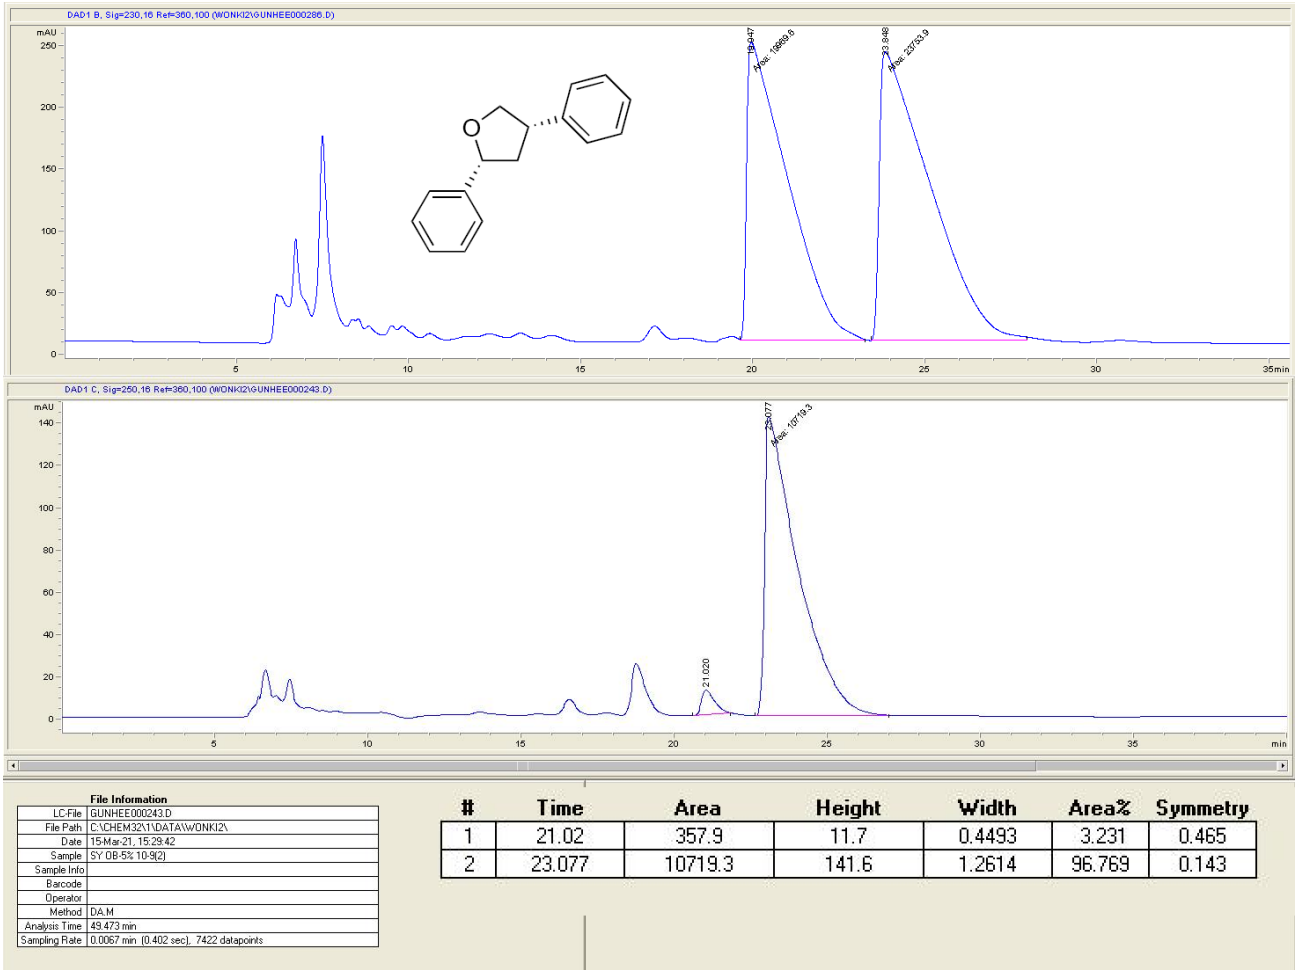

*trans*-5: Chiralcel OD, 2% IPA/HXN, 0.5ml/min

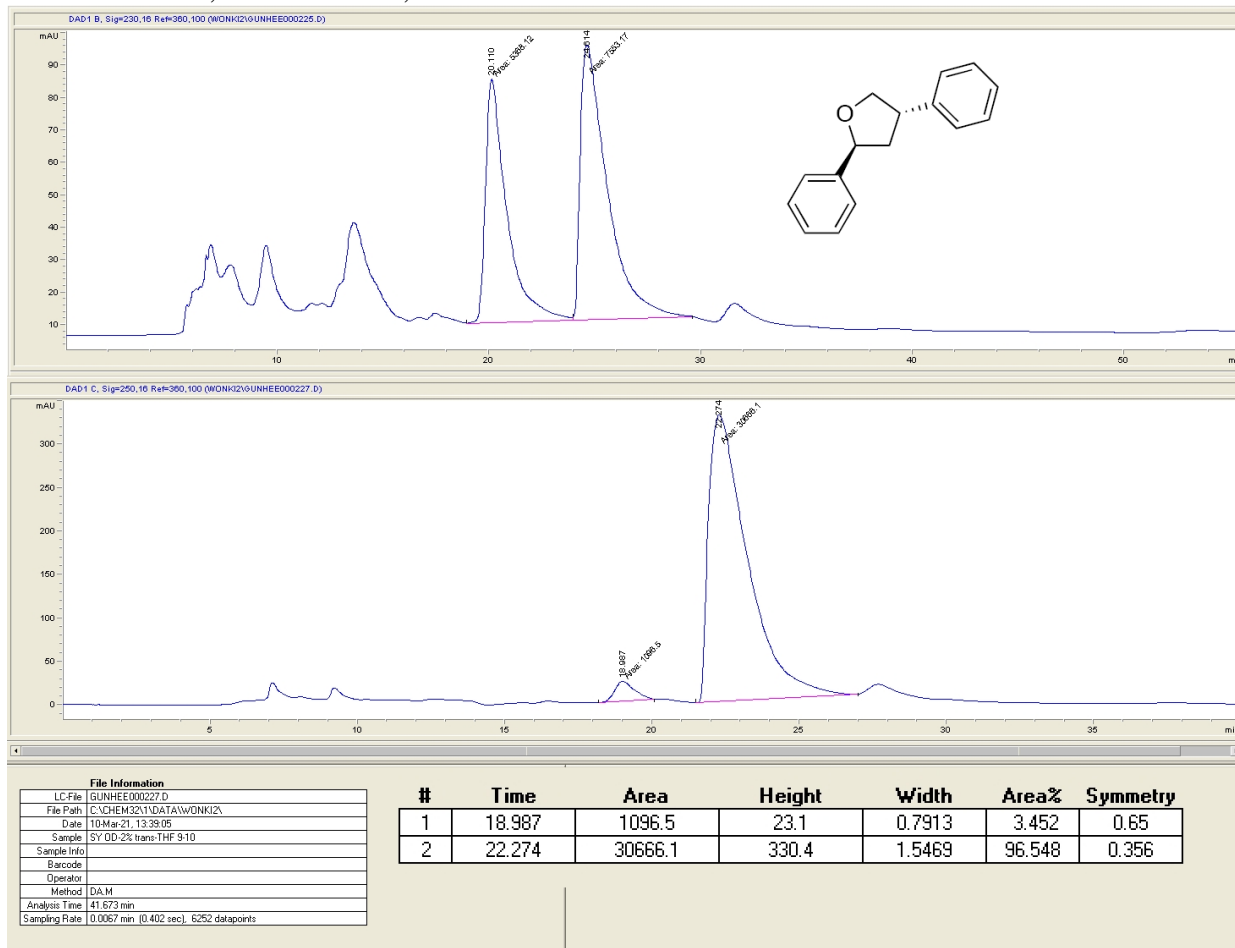

*cis*-6: Chiralcel OJ-H, 10% IPA/HXN, 0.5ml/min

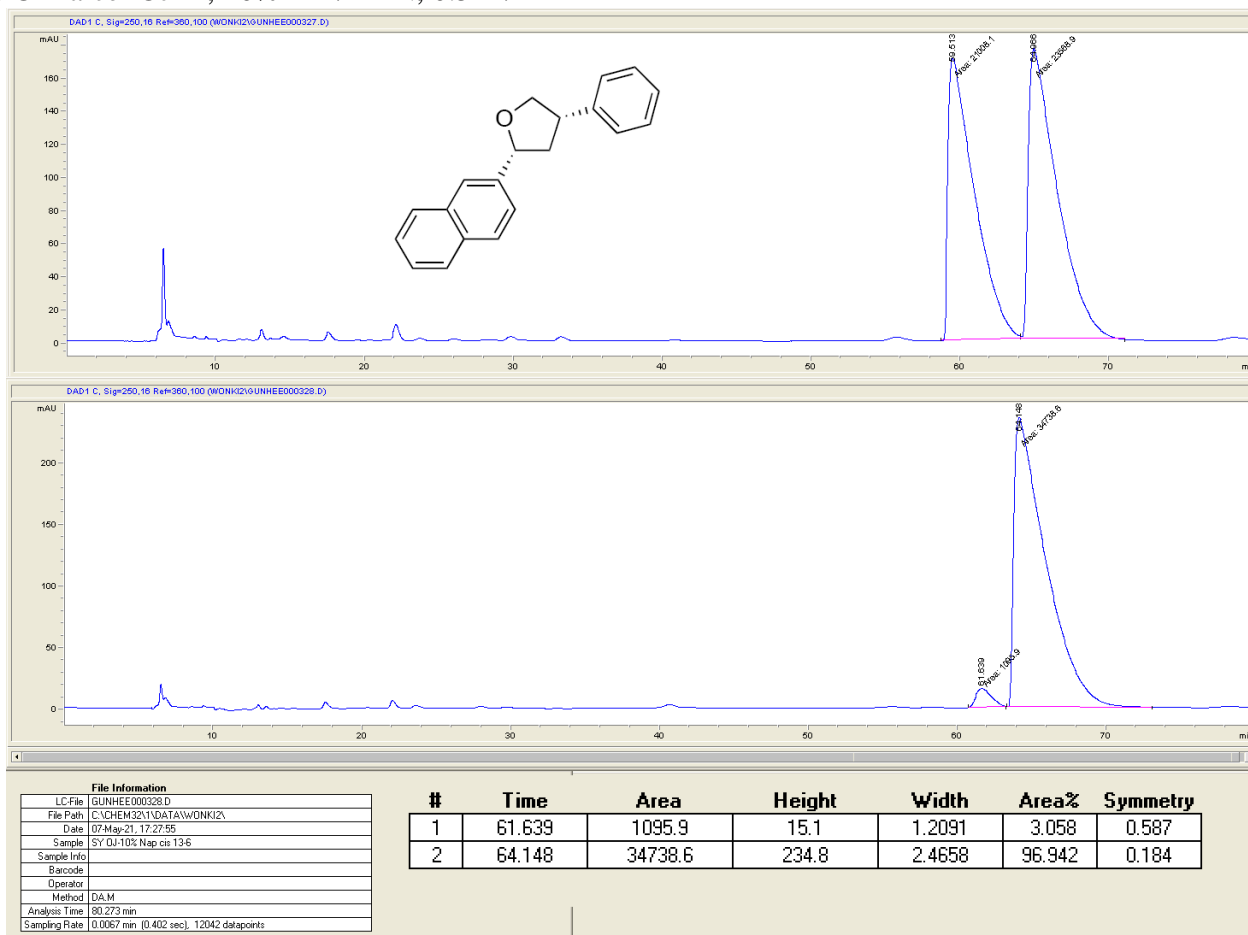



*trans*-6: Chiralcel OJ-H, 10% IPA/HXN, 0.5ml/min

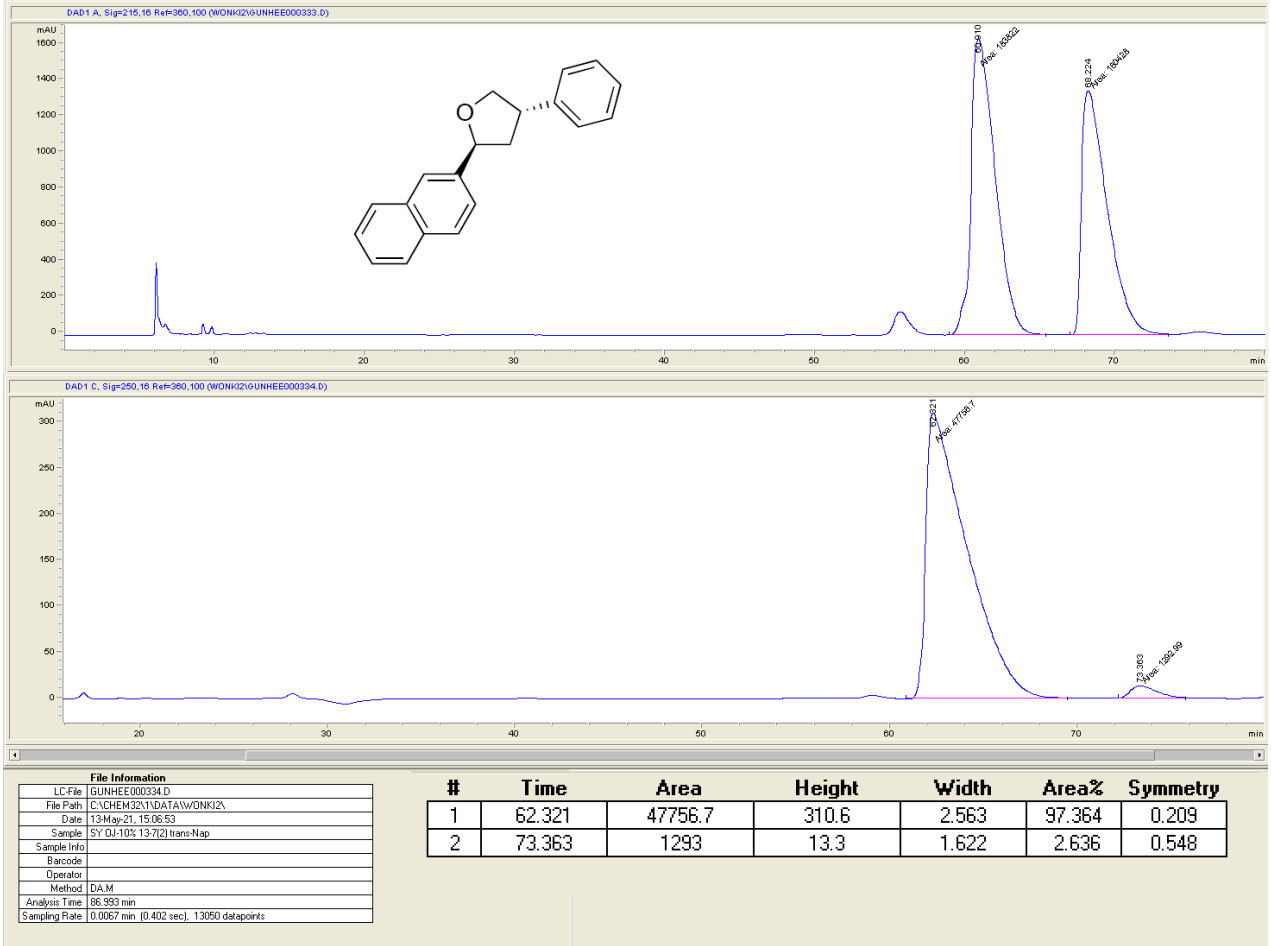

*cis*-7: Chiralcel OB-H, 10% IPA/HXN, 0.5ml/min

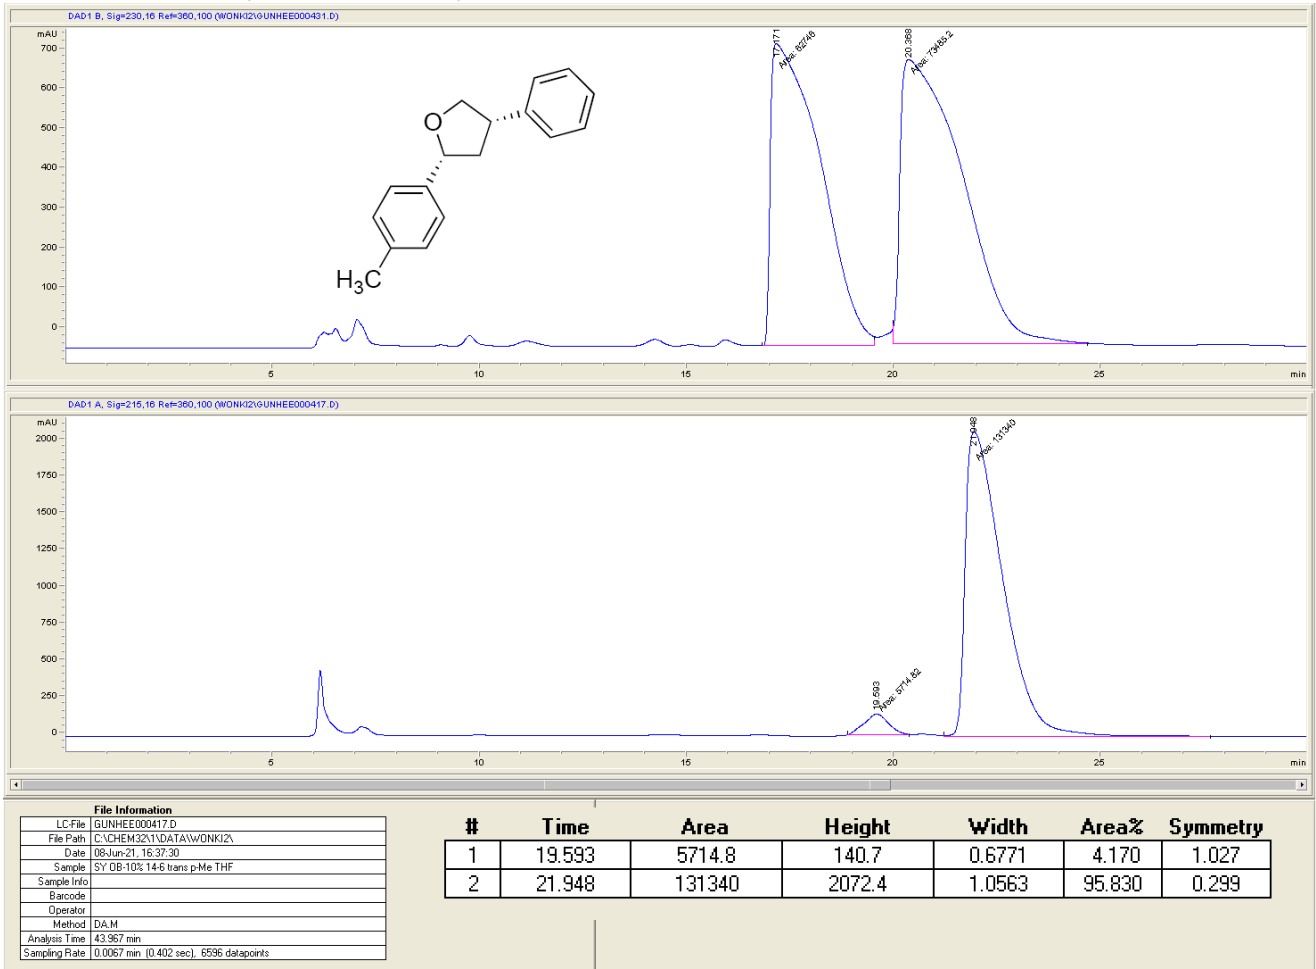

*trans*-7: Chiralcel OB-H, 10% IPA/HXN, 0.5ml/min

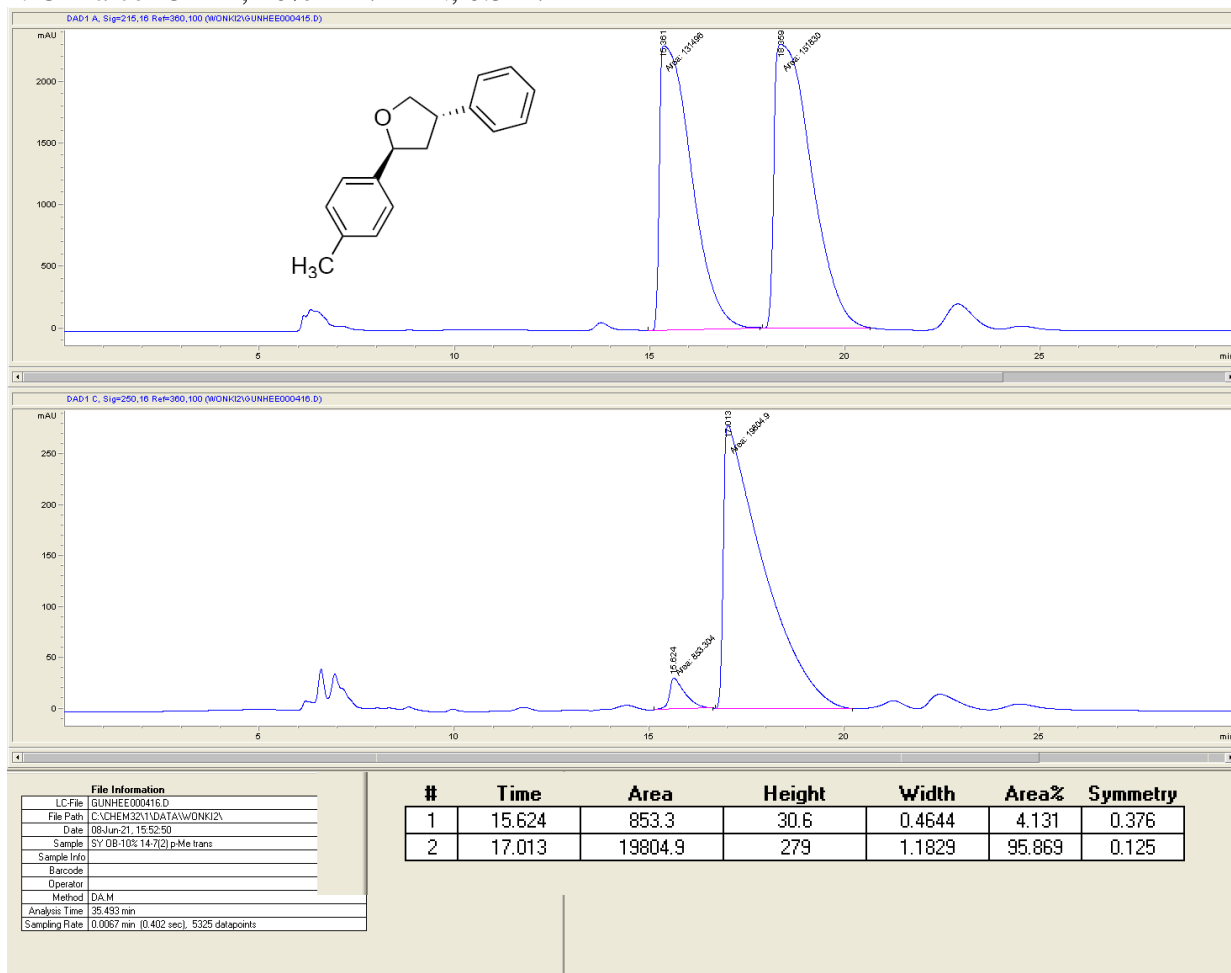

*cis*-8: Chiralcel OD, 2% IPA/HXN, 0.5ml/min

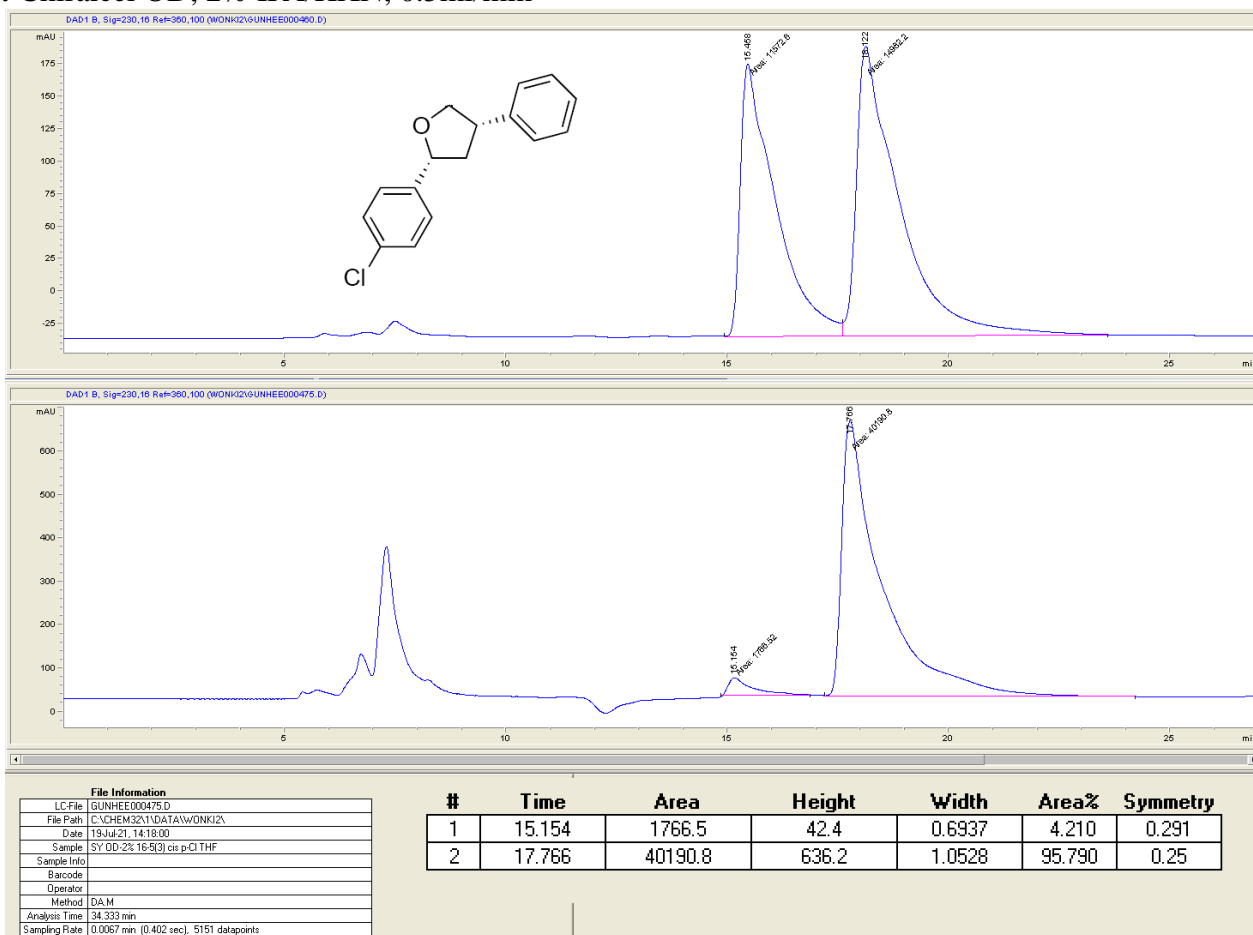

*trans*-9: Chiralcel OD, 2% IPA/HXN, 0.5ml/min

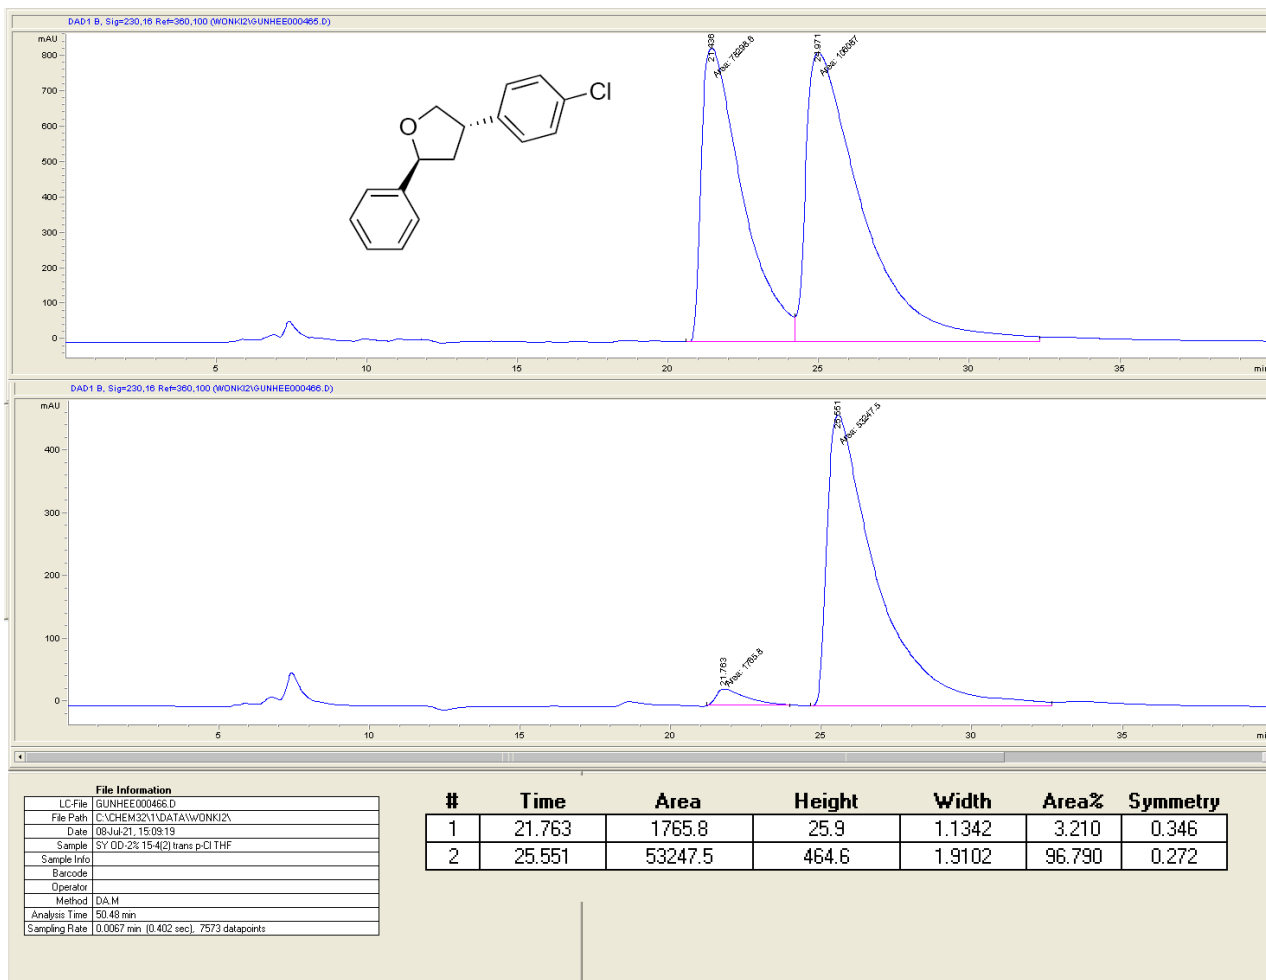

Supplement: d1ob01403j1.pdf [file d1ob01403j1.pdf]
